# Supplementary material for: Genetic background- and environment-independent QTL and candidate gene identification of appearance quality in three MAGIC populations of rice
Source: Front Plant Sci. 2022 Nov 11;13:1074106. doi: 10.3389/fpls.2022.1074106 (PMC9697191; doi:10.3389/fpls.2022.1074106)
Supplement: Supplementary file 2 [file Table_1.xlsx]

## Sheet: phone
	Supplementary Table S1 | List of the phenotype of grain shape and chalkiness related traits in this study.
	Line	Population	15PX-GL	15PX-GW	15PX-GLWR	15PX-PGWC	15PX-DEC	15SZ-GL	15SZ-GW	15SZ-GLWR	15SZ-PGWC	15SZ-DEC	16PX-GL	16PX-GW	16PX-GLWR	16PX-PGWC	16PX-DEC	16SZ-GL	16SZ-GW	16SZ-GLWR	16SZ-PGWC	16SZ-DEC
	L0663	DC1	8.554	2.512	3.434	11.28	2.08	8.37	2.533	3.329	63.65	21.54	8.604	2.569	3.364	85.78	37.29	8.595	2.53	3.417	65.8	22.66
	L0664	DC1	7.918	2.552	3.117	14.2	2.36	8.061	2.624	3.092	83.98	27.51	9.226	2.989	3.096	42.06	12.51	8.337	2.567	3.266	43.32	10.28
	L0666	DC1	7.284	2.894	2.525	24.03	6.45	9.619	2.603	3.722	3.26	0.85	9.755	2.628	3.729	4.93	1.05	9.641	2.598	3.728	29.01	5.92
	L0667	DC1	8.656	2.756	3.166	19.65	4.51	8.695	2.856	3.062	60.88	15.26	8.823	2.781	3.195	100	75.07	8.829	2.748	3.23	69.31	24.88
	L0668	DC1	7.576	2.585	2.948	11.92	2.04	7.756	2.573	3.036	24.34	5.62	7.911	2.597	3.065	52.94	14.19	8.379	2.789	3.019	83.61	35
	L0669	DC1	9.258	3.024	3.081	53.2	14.5	9.519	3.107	3.078	88.53	29.73	8.99	3.054	2.939	98.35	56.3	9.671	3.147	3.083	98.89	48.88
	L0670	DC1	9.031	2.726	3.323	20.54	4.13	9.389	2.822	3.345	75.77	27.53	9.241	2.796	3.318	76.07	31.08	9.932	2.843	3.503	85.83	29.79
	L0671	DC1	9.663	2.473	3.932	NA	NA	9.573	2.764	3.496	63.71	23.22	8.546	2.495	3.441	74.14	32.27	9.233	2.488	3.743	67.7	28.2
	L0672	DC1	9.221	2.651	3.498	15.5	2.84	9.475	2.841	3.361	68.67	20.61	8.015	2.585	3.109	81.46	31.91	9.527	2.754	3.473	76.71	37.84
	L0673	DC1	8.639	2.496	3.483	1.34	0.13	8.896	2.635	3.393	14.07	4.08	8.654	2.534	3.428	24.56	4.79	8.71	2.634	3.323	56.98	23.1
	L0674	DC1	8.985	3.115	2.896	16.07	1.85	9.127	3.065	2.985	5.32	0.73	8.935	3.054	2.932	63.75	12.57	8.838	2.928	3.028	95.11	47.58
	L0676	DC1	9.367	2.744	3.428	11.27	1.8	9.764	2.862	3.422	10.65	2.05	8.569	2.662	3.222	76.93	31.22	9.778	2.851	3.443	74.98	30.04
	L0677	DC1	7.315	2.563	2.872	27.1	5.01	7.929	2.604	3.07	34.93	9.8	7.568	2.541	2.991	83.23	30.62	7.829	2.552	3.079	66.31	26.4
	L0678	DC1	NA	NA	NA	NA	NA	9.322	2.765	3.394	54.59	15.6	9.341	2.72	3.452	18.28	2.9	9.306	2.7	3.463	83.15	25.26
	L0679	DC1	7.486	2.824	2.661	2.74	0.21	8.026	2.678	3.044	5.68	1	7.825	2.788	2.814	18.57	2.84	7.626	2.693	2.841	24.14	8.74
	L0680	DC1	8.932	2.707	3.322	21.8	4.47	9.503	2.756	3.471	81.45	24.14	9.089	2.766	3.305	83.62	25.67	9.528	2.807	3.415	87.81	33
	L0681	DC1	9.024	2.324	3.909	7.68	1.53	9.292	2.38	3.937	3.89	0.63	8.664	2.468	3.547	38.25	7.84	9.1	2.299	3.993	45.06	12.86
	L0682	DC1	9.154	2.63	3.504	4.23	0.98	9.438	2.781	3.415	19.36	6.99	8.858	2.598	3.425	38.92	11.74	9.153	2.722	3.38	50.5	22.3
	L0683	DC1	NA	NA	NA	NA	NA	8.891	2.694	3.319	53.99	12.07	8.673	2.554	3.39	100	92.7	8.904	2.479	3.61	NA	NA
	L0684	DC1	8.33	2.656	3.153	12.99	2.71	8.464	2.728	3.116	53.11	14.68	8.361	2.655	3.158	44.47	14.61	8.763	2.755	3.193	51.97	18.32
	L0685	DC1	8.286	3.07	2.706	77.22	11.29	8.593	3.109	2.778	79.93	17.78	7.247	2.527	2.881	98.72	53.28	8.49	2.902	2.941	92.47	38.05
	L0686	DC1	8.925	2.548	3.526	9.5	1.88	8.616	2.485	3.494	7.38	1.51	8.409	2.477	3.433	51.4	11.71	8.907	2.639	3.4	60.2	21.05
	L0687	DC1	8.783	2.591	3.406	10.26	1.61	9.138	2.647	3.474	8.06	1.95	8.843	2.664	3.334	73.72	21.84	9.275	2.615	3.575	94.21	45.27
	L0688	DC1	8.518	2.496	3.437	7.93	1.17	8.65	2.638	3.301	4.68	0.52	8.303	2.507	3.324	74.6	23.13	8.779	2.608	3.381	35.54	12.06
	L0689	DC1	9.378	2.806	3.362	7.41	1.05	9.609	2.839	3.4	14.99	2.25	8.931	2.72	3.283	9.82	2.04	9.822	2.619	3.775	51.02	12.04
	L0691	DC1	NA	NA	NA	NA	NA	8.209	2.738	3.02	2.27	0.56	8.335	2.754	3.039	27.21	5.48	8.191	2.613	3.152	40.34	13.96
	L0692	DC1	NA	NA	NA	NA	NA	8.601	2.659	3.252	4.14	0.72	NA	NA	NA	NA	NA	8.176	2.47	3.335	21.53	5.68
	L0693	DC1	8.843	2.708	3.28	4.28	0.68	8.846	2.701	3.292	24.73	5.84	8.702	2.703	3.231	54.4	12.8	8.757	2.674	3.296	57.56	16.65
	L0694	DC1	8.469	2.571	3.306	7.06	1.28	8.64	2.71	3.201	5.57	1.5	8.43	2.618	3.233	29.95	8.89	8.587	2.616	3.295	57.12	17.33
	L0695	DC1	8.334	2.578	3.253	5.96	0.61	8.464	2.546	3.352	6.08	1.25	8.535	2.558	3.353	25.19	3.82	8.369	2.51	3.358	33.33	9.34
	L0696	DC1	NA	NA	NA	NA	NA	8.747	2.597	3.383	12.38	3.17	8.493	2.447	3.486	47.83	8.56	8.795	2.548	3.473	85.96	33.36
	L0697	DC1	9.056	3.064	2.969	38.77	8.79	9.118	3.011	3.045	87.03	23.07	9.113	3.035	3.012	97.46	53.29	8.913	2.435	3.704	66.32	37.1
	L0698	DC1	9.476	2.686	3.543	5.84	1.16	9.357	2.612	3.606	11.89	2.29	9.502	2.548	3.754	18.24	4.41	9.442	2.5	3.8	83.02	38.87
	L0700	DC1	7.959	2.393	3.34	6.07	1.32	8.284	2.532	3.29	50.08	10.96	8.335	2.517	3.326	88.75	30.71	8.35	2.504	3.35	88	35.46
	L0701	DC1	NA	NA	NA	NA	NA	8.326	2.661	3.144	17.25	3.08	8.471	2.651	3.208	36	15.7	8.429	2.601	3.258	75.22	53.05
	L0702	DC1	8.457	2.27	3.757	14.56	2.9	8.474	2.821	3.018	67.2	16.6	8.388	2.734	3.08	10.11	2.25	8.398	2.746	3.071	69.13	23.94
	L0703	DC1	NA	NA	NA	NA	NA	9.526	2.673	3.587	NA	NA	7.772	2.327	3.358	100	91.61	9.679	2.583	3.777	NA	NA
	L0704	DC1	8.019	2.707	2.968	6.61	1.14	8.081	2.686	3.021	37.24	10.77	8.358	2.704	3.097	36.43	11.19	8.187	2.717	3.024	79.93	38.37
	L0705	DC1	8.467	2.719	3.129	23.3	5.06	8.902	2.735	3.279	92.34	38.4	8.559	2.732	3.145	85.56	34.35	8.57	2.711	3.174	99.08	52.82
	L0707	DC1	NA	NA	NA	NA	NA	9.132	2.602	3.534	2.11	0.46	8.549	2.67	3.222	10.84	1.67	8.877	2.54	3.518	21.07	NA
	L0708	DC1	NA	NA	NA	NA	NA	8.899	2.581	3.468	0.23	0.03	8.579	2.575	3.347	100	92.24	8.796	2.404	3.683	NA	NA
	L0709	DC1	8.487	2.85	2.993	27.09	7.13	8.652	2.794	3.11	74.07	19.13	8.225	2.727	3.027	73.03	25.09	8.454	2.775	3.063	93.94	50.14
	L0710	DC1	9.422	2.461	3.855	NA	NA	9.425	2.396	3.964	19.89	4.18	9.369	2.307	4.092	13.7	3.03	8.99	2.356	3.847	63.35	25.97
	L0711	DC1	8.334	2.632	3.183	6.67	1.21	8.808	2.638	3.357	12.86	3.94	8.389	2.67	3.153	31.5	6.31	8.611	2.612	3.314	71.79	28.89
	L0712	DC1	8.787	2.894	3.047	14	2.11	NA	NA	NA	NA	NA	NA	NA	NA	95.54	54.95	8.972	2.912	3.096	90.67	34.26
	L0713	DC1	9.07	2.771	3.284	37.28	8.6	8.922	2.646	3.389	73.92	25.69	8.504	2.652	3.216	NA	NA	8.395	2.718	3.103	97.97	42.92
	L0714	DC1	9.24	2.596	3.586	24.18	4.78	9.424	2.681	3.538	10.43	2.22	9.197	2.631	3.513	95.29	47.94	9.498	2.736	3.495	66.64	21.6
	L0715	DC1	8.762	2.69	3.27	15.19	3.59	8.812	2.707	3.272	55.84	14.37	8.472	2.623	3.241	60.76	19.99	9.034	2.713	3.35	67.79	23.98
	L0716	DC1	9.248	2.5	3.722	5.55	0.83	9.144	2.618	3.52	11.31	1.83	9.25	2.566	3.62	96.66	40.71	9.312	2.537	3.698	41.9	14.22
	L0717	DC1	7.96	2.478	3.235	8.69	1.52	8.07	2.548	3.181	15.83	3.21	8.256	2.525	3.277	25.83	5.88	8.138	2.55	3.206	41.34	12.56
	L0718	DC1	8.361	2.573	3.269	5.87	1.19	8.583	2.627	3.28	41.67	10.79	8.977	2.54	3.549	31.45	6.88	9.361	2.585	3.642	76.37	26.39
	L0719	DC1	8.927	2.411	3.726	8.79	0.94	9.161	2.503	3.688	13.65	2.92	8.895	2.414	3.705	9.4	2.16	9.051	2.417	3.776	28.66	9.42
	L0720	DC1	NA	NA	NA	NA	NA	9.119	2.997	3.058	96.17	25.3	NA	NA	NA	NA	NA	9.083	2.857	3.217	89.31	22.54
	L0721	DC1	8.321	3.155	2.645	83.83	14.84	8.6	3.188	2.71	96.9	25.13	8.641	2.927	2.962	NA	NA	8.899	2.739	3.269	90.95	39.78
	L0722	DC1	9.045	2.992	3.032	9.76	1.65	9.32	3.169	2.95	96.03	33.49	7.909	2.851	2.783	5.71	1.13	8.386	2.865	2.946	94.16	44.01
	L0723	DC1	9.572	2.791	3.456	17.29	1.88	9.616	2.751	3.516	64.86	15.27	9.96	2.702	3.7	15.6	1.73	9.814	2.613	3.778	75.8	16.44
	L0724	DC1	9.242	2.455	3.791	7.63	1.43	9.386	2.558	3.697	91.86	30.94	8.864	2.416	3.692	51.6	16	9.384	2.57	3.679	73.17	30.77
	L0726	DC1	8.723	2.435	3.605	15.23	3.18	8.793	2.535	3.483	25.02	5.98	7.523	2.113	3.582	56.84	18.47	8.928	2.512	3.571	48.64	19.08
	L0727	DC1	NA	NA	NA	NA	NA	8.832	3.091	2.865	71.46	19.38	8.926	2.918	3.066	5.7	1.75	8.836	2.806	3.172	65.78	19.56
	L0728	DC1	8.568	2.454	3.513	22.74	4.83	8.621	2.493	3.476	5.45	1	8.272	2.413	3.444	NA	NA	8.726	2.505	3.498	55.23	16.27
	L0729	DC1	8.268	2.724	3.049	5.25	0.89	8.508	2.814	3.043	28.71	6.68	8.41	2.771	3.046	20.66	5	8.32	2.764	3.028	NA	NA
	L0730	DC1	8.765	2.538	3.472	13.7	3.5	8.733	2.634	3.336	20.46	6.14	8.707	2.589	3.377	NA	NA	8.804	2.6	3.402	61.13	20.05
	L0732	DC1	7.513	2.701	2.792	5.27	0.85	7.676	2.659	2.897	5.98	0.89	7.882	2.683	2.948	81.57	24.01	7.949	2.591	3.085	80.34	25.5
	L0733	DC1	9.017	2.734	3.323	17.21	3.03	9.239	2.747	3.377	18.05	4.36	9.328	2.742	3.409	13.99	3.1	9.345	2.682	3.5	69.77	21.86
	L0734	DC1	8.598	2.646	3.271	10.09	1.57	8.681	2.689	3.254	41.47	7.29	8.622	2.63	3.295	33.76	7.86	9.002	2.689	3.365	77.24	27.09
	L0735	DC1	9.281	2.449	3.824	1.82	0.18	9.605	2.445	3.964	7.11	1.31	8.612	2.378	3.664	24.85	4.85	9.593	2.44	3.956	40.27	16.06
	L0736	DC1	7.739	2.813	2.765	5.83	0.74	7.906	2.894	2.742	33.66	7.07	9.44	3.124	3.031	96.31	34.88	7.704	2.752	2.815	61.92	17.57
	L0737	DC1	NA	NA	NA	NA	NA	8.333	2.561	3.271	14.23	2.56	8.07	2.494	3.245	92.53	42.21	8.473	2.538	3.355	42.78	13.97
	L0738	DC1	7.647	2.559	3.004	6.1	0.87	7.905	2.631	3.019	18.29	3.65	8.022	2.563	3.144	32.39	7.45	8.039	2.635	3.069	71.7	24.98
	L0739	DC1	8.948	2.598	3.461	7.29	1.4	9.114	2.72	3.362	57.55	14.76	9.062	2.608	3.487	18.31	5.3	9.636	2.711	3.573	74.04	30.59
	L0740	DC1	NA	NA	NA	NA	NA	8.482	2.815	3.028	97.94	34.1	8.221	2.753	2.997	82.95	22.68	8.666	2.856	3.047	96.06	39.44
	L0741	DC1	8.362	2.452	3.429	11.37	1.93	8.582	2.452	3.524	15.84	3.82	8.493	2.376	3.592	45.14	14.86	8.757	2.459	3.588	85.15	40.41
	L0742	DC1	8.855	2.452	3.635	4.01	0.57	8.911	2.507	3.58	6.38	1.12	8.851	2.511	3.544	44.59	11.56	9.122	2.6	3.528	37.55	11.04
	L0743	DC1	8.317	2.911	2.865	9.03	0.72	8.397	2.839	2.97	68.95	14.32	7.379	2.42	3.057	68.19	19.05	8.654	2.726	3.195	96.96	43.74
	L0744	DC1	8.364	3.009	2.787	72.17	16.22	8.594	2.962	2.915	88.52	25.27	8.474	2.957	2.874	98.99	53.33	8.691	2.973	2.933	98.98	48.81
	L0745	DC1	8.638	2.573	3.375	37.54	6.1	8.312	2.614	3.199	71.22	19.86	8.152	2.547	3.217	49.73	10.89	8.123	2.626	3.109	94.07	36.79
	L0746	DC1	9.05	2.847	3.194	33.82	7.27	9.252	2.868	3.24	83.31	21.8	7.826	2.473	3.172	87.43	39.17	9.192	2.836	3.253	89.82	32.83
	L0747	DC1	NA	NA	NA	NA	NA	NA	NA	NA	NA	NA	NA	NA	NA	NA	NA	8.938	2.635	3.43	23.32	9.18
	L0748	DC1	7.794	2.67	2.935	9.51	1.53	8.234	2.723	3.037	16.9	4.67	8.044	2.704	2.993	19.31	3.17	8.177	2.66	3.088	66.45	25.24
	L0749	DC1	8.538	2.922	2.935	46.24	6.29	8.682	3.015	2.896	99.66	43.25	8.397	2.963	2.85	99.72	53.26	8.553	2.979	2.89	97.19	35.93
	L0750	DC1	7.872	2.631	3.004	0.54	0.05	7.904	2.647	3.005	0.21	0.04	7.816	2.593	3.023	99.02	59.41	7.814	2.552	3.079	NA	NA
	L0751	DC1	7.733	2.48	3.143	10.97	2.71	8.25	2.483	3.347	17.58	5.81	7.955	2.416	3.304	NA	NA	8.046	2.469	3.284	53.34	18.69
	L0752	DC1	NA	NA	NA	NA	NA	9.554	2.924	3.285	35.74	12.27	9.5	2.943	3.233	40.08	15.91	9.771	3.041	3.225	86.79	37.83
	L0753	DC1	8.077	2.645	3.07	21.25	6.31	8.918	2.531	3.551	6.09	1.24	8.372	2.549	3.301	NA	NA	8.642	2.624	3.309	60.69	25.24
	L0754	DC1	9.722	2.574	3.813	14.77	3.16	9.785	2.56	3.857	6.78	2.04	9.551	2.57	3.736	24.67	6.09	9.322	2.571	3.645	57.29	22.72
	L0755	DC1	NA	NA	NA	NA	NA	8.837	2.563	3.471	8.7	2.54	8.728	2.592	3.386	33.9	7.26	8.678	2.462	3.552	NA	NA
	L0756	DC1	8.154	2.964	2.759	94.66	25.89	8.205	2.934	2.808	100	50.11	8.04	2.899	2.782	100	68.34	8.328	3.068	2.724	100	68.9
	L0757	DC1	NA	NA	NA	NA	NA	8.632	2.638	3.293	35.23	10.08	8.433	2.5	3.381	61.6	13.43	8.649	2.461	3.545	58.01	18.55
	L0758	DC1	7.856	2.422	3.264	10.91	1.72	8.393	2.497	3.38	9.77	2.43	8.249	2.492	3.322	22.09	4.35	8.775	2.637	3.352	53.94	19.49
	L0759	DC1	8.34	2.605	3.226	24.55	4.2	8.636	2.596	3.351	20.64	4.18	8.145	2.614	3.124	61.2	21.19	8.343	2.532	3.334	78.54	36.49
	L0760	DC1	8.599	2.468	3.503	2.06	0.48	8.932	2.495	3.599	6.32	1.25	NA	NA	NA	NA	NA	8.904	2.506	3.575	30.61	10.88
	L0761	DC1	8.426	3.003	2.826	36.23	8.26	9.234	2.616	3.545	13.37	2.85	8.907	2.559	3.488	53.68	11.31	9.002	2.537	3.566	68.26	26.79
	L0762	DC1	7.78	2.617	2.982	16.32	3.43	8.033	2.68	3.011	11.87	2.77	8.11	2.617	3.109	98.34	52.64	8.204	2.56	3.22	73.38	37.75
	L0763	DC1	9.25	2.765	3.365	8.18	2.07	9.749	2.91	3.372	93.99	44.87	9.333	2.824	3.324	87.95	34.69	9.133	3.079	2.99	87.63	36.07
	L0764	DC1	8.775	2.804	3.146	24.68	9.29	9.078	2.984	3.059	95.62	37.93	8.846	2.764	3.22	95.56	54.62	8.793	2.737	3.237	93.01	40.34
	L0765	DC1	9.064	2.541	3.588	13.66	3.51	9.318	2.56	3.677	NA	NA	8.054	2.185	3.705	20.66	5.06	9.512	2.527	3.797	63.42	22.66
	L0766	DC1	NA	NA	NA	13.84	2.13	8.236	2.515	3.293	83.91	21.99	8.112	2.519	3.228	96.92	47.36	8.112	2.514	3.241	92.9	34.05
	L0767	DC1	9.215	2.778	3.342	49.03	8.63	9.523	2.719	3.525	84.3	30.38	9.148	2.688	3.42	87.32	32.21	9.499	2.691	3.551	98.01	57.26
	L0768	DC1	7.843	2.494	3.158	10.7	2.12	8.079	2.614	3.117	15.46	3.59	7.869	2.564	3.083	95.68	45.75	8.271	2.562	3.245	83.16	34.44
	L0769	DC1	7.904	2.553	3.117	14.77	2.79	8.157	2.559	3.212	59.73	22.24	8.165	2.598	3.161	99.53	75.71	8.475	2.647	3.236	97.8	57.67
	L0770	DC1	8.461	2.686	3.166	4.3	0.48	8.767	2.673	3.321	17.71	4.97	7.262	2.328	3.136	9.56	1.66	8.588	2.763	3.126	57.84	23.53
	L0771	DC1	8.091	2.604	3.134	24.32	4.3	8.396	2.543	3.333	63.24	17.49	8.241	2.555	3.241	85.97	35.15	8.636	2.644	3.289	91.41	46.89
	L0772	DC1	8.859	2.682	3.319	NA	NA	9.288	2.719	3.431	72.13	20.25	8.938	2.661	3.367	27.53	5.66	9.252	2.642	3.526	87.9	34.83
	L0773	DC1	8.424	2.808	3.006	5.62	1.05	8.545	2.852	3.009	63.66	22.35	8.478	2.839	2.991	17.57	2.61	8.686	2.874	3.031	70.78	21.29
	L0775	DC1	8.183	2.488	3.31	12.65	1.93	8.491	2.47	3.459	20.43	6.13	8.301	2.449	3.404	40.96	7.42	8.607	2.542	3.414	65.19	22.35
	L0776	DC1	9.142	2.479	3.716	33.11	6.33	9.352	2.594	3.634	35.94	8.86	8.933	2.507	3.585	81.74	30.61	9.58	2.596	3.721	93.92	40.31
	L0777	DC1	10.071	2.512	4.038	29.19	7.95	10.264	2.476	4.178	31.31	8.26	10.072	2.458	4.112	65.68	20.98	10.379	2.462	4.243	87.47	34.57
	L0778	DC1	9.272	2.69	3.471	18.54	3.99	NA	NA	NA	NA	NA	7.945	2.328	3.433	94.41	58.12	9.403	2.665	3.551	78.93	38.01
	L0779	DC1	8.646	2.293	3.799	9.48	1.32	8.912	2.368	3.793	NA	NA	8.613	2.492	3.481	99.19	86.88	9.1	2.333	3.927	NA	NA
	L0780	DC1	8.486	2.614	3.264	4.55	0.77	NA	NA	NA	NA	NA	8.609	2.622	3.294	5.81	0.88	8.758	2.591	3.398	61.76	15.55
	L0781	DC1	9.261	2.443	3.819	7.27	0.95	9.596	2.5	3.882	41.04	10.34	9.431	2.385	3.982	51.14	16.25	9.552	2.445	3.937	81.74	33.46
	L0782	DC1	8.409	2.536	3.344	3.87	0.58	8.537	2.542	3.381	14.52	2.5	8.447	2.516	3.373	9.16	1.58	9.171	2.639	3.504	43.88	15.61
	L0783	DC1	7.916	2.543	3.128	17.53	4.57	8.242	2.527	3.287	30.5	7.17	7.996	2.494	3.216	30.21	6.48	8.485	2.518	3.391	69.44	25.06
	L0784	DC1	NA	NA	NA	5.34	0.69	7.956	2.434	3.289	17.99	5.42	7.876	2.399	3.302	NA	NA	8.064	2.653	3.062	89.72	41.79
	L0785	DC1	8.678	2.554	3.418	4.84	0.6	NA	NA	NA	NA	NA	8.713	2.585	3.379	12.28	2.42	8.917	2.649	3.383	51.74	18.63
	L0786	DC1	9.196	2.608	3.551	9.56	1.86	8.963	2.603	3.472	14.48	3.43	NA	NA	NA	52.51	14.77	9.244	2.606	3.57	51.8	17.89
	L0787	DC1	8.391	3.181	2.646	68.94	15	8.606	3.157	2.743	98.77	62.55	8.445	3.128	2.706	93.12	32.74	8.585	3.118	2.764	100	49.12
	L0788	DC1	8.093	2.492	3.268	8.03	0.97	8.393	2.523	3.359	87.47	29.79	8.35	2.576	3.26	87.84	30.48	8.553	2.556	3.368	94.79	45.26
	L0789	DC1	8.751	2.787	3.152	20.4	3.22	8.876	2.862	3.116	98.92	68.42	8.665	2.753	3.159	13.5	3.11	8.869	2.797	3.187	100	61.94
	L0790	DC1	8.822	2.815	3.151	15.42	2.89	9.205	2.541	3.654	85.74	30.55	7.878	2.092	3.782	19.32	5.59	9.141	2.582	3.572	NA	NA
	L0791	DC1	8.45	2.713	3.136	8.94	1.69	8.892	2.631	3.407	31.41	7.22	8.545	2.636	3.26	92.66	42.39	8.921	2.667	3.367	73.34	30.87
	L0792	DC1	10.194	2.578	3.997	25.47	7.08	10.248	2.41	4.293	96.32	46.39	9.904	2.401	4.169	73.68	29.6	10.372	2.351	4.456	89.3	42.75
	L0793	DC1	8.94	2.632	3.415	31.63	7.8	8.939	2.572	3.498	16	3.27	8.74	2.585	3.396	67	25.75	9.069	2.624	3.482	93.07	49.12
	L0794	DC1	8.253	2.706	3.066	23.35	5.06	7.4	2.634	2.83	7.83	1.97	6.505	2.335	2.797	82.68	33.78	7.38	2.649	2.798	73.28	30.89
	L0795	DC1	8.584	2.459	3.512	2.39	0.2	8.623	2.634	3.293	93.17	30.98	8.313	2.593	3.22	37.58	7.19	8.731	2.66	3.302	89.74	35.21
	L0796	DC1	8.563	2.57	3.35	NA	NA	8.553	2.586	3.331	5.12	0.74	9.052	2.776	3.278	33.43	6.74	8.931	2.861	3.14	45.84	11.65
	L0797	DC1	8.774	2.464	3.584	3.81	0.38	9.001	2.449	3.702	29.02	9.7	8.857	2.432	3.654	40	13.75	9.358	2.485	3.793	55.76	22.93
	L0798	DC1	8.811	2.525	3.518	2.64	0.47	9.376	2.63	3.586	3.56	0.65	8.763	2.58	3.413	8.59	1.62	9.225	2.643	3.51	45.5	12.86
	L0799	DC1	9.124	3.037	3.022	23.83	3.6	9.396	3.003	3.162	96.28	34.01	9.079	3.03	3.013	98.02	35.14	9.209	2.912	3.236	78.79	39.31
	L0800	DC1	8.211	2.57	3.212	8.09	1.66	8.429	2.645	3.208	8.63	1.69	8.582	2.604	3.31	68.21	21.92	8.478	2.668	3.196	56.93	22.86
	L0801	DC1	9.219	2.716	3.419	42	9.86	8.869	2.843	3.149	85.74	28.06	9.129	2.677	3.429	94.75	47.05	9.13	2.685	3.418	91.85	43.17
	L0802	DC1	9.969	2.525	3.973	6.95	0.93	NA	NA	NA	NA	NA	8.914	2.606	3.437	21.33	3.89	9.225	2.506	3.713	38.4	10.32
	L0803	DC1	9.529	2.563	3.739	9.18	1.53	9.508	2.533	3.789	33.53	7.13	9.316	2.54	3.687	19.63	5.07	9.724	2.542	3.846	51.02	21.57
	L0805	DC1	8.558	2.487	3.459	28.53	8.46	8.712	2.489	3.53	49.43	14.49	8.532	2.444	3.507	81.52	32.54	8.908	2.533	3.543	86.9	35.54
	L0806	DC1	10.16	2.629	3.896	24.68	5.51	10.064	2.642	3.844	60.17	19.07	10.075	2.567	3.948	28.55	8.25	10.395	2.531	4.127	90.01	36.61
	L0807	DC1	9.201	2.628	3.522	8.85	1.86	9.484	2.518	3.804	37.4	9.69	9.405	2.492	3.802	14.17	2.57	9.775	2.437	4.039	54.3	15.78
	L0808	DC1	7.432	2.71	2.758	30	6.47	7.28	2.641	2.766	41.39	13.66	7.525	2.644	2.859	57.23	20.09	7.416	2.652	2.806	60.62	25.24
	L0809	DC1	NA	NA	NA	NA	NA	9.103	3.01	3.036	19.42	5.14	8.68	2.947	2.956	33.04	8.61	9.015	2.887	3.139	51.78	11.53
	L0810	DC1	8.36	2.681	3.132	28.69	6.13	8.595	2.691	3.228	4.92	0.84	8.443	2.664	3.179	9.47	2.42	8.718	2.741	3.197	50.81	22.49
	L0811	DC1	7.853	2.843	2.782	35.89	8.23	7.878	2.73	2.898	46.89	12.05	8.074	2.699	3	79.24	25.11	8.176	2.655	3.098	80.07	30.67
	L0813	DC1	NA	NA	NA	NA	NA	9.144	2.581	3.563	1.22	0.33	8.762	2.603	3.375	53.7	11.23	8.802	2.509	3.527	54.51	14.6
	L0814	DC1	8.803	2.609	3.399	15.97	2.46	9.023	2.723	3.327	80.4	22.19	NA	NA	NA	97.27	42.89	8.731	2.599	3.388	75.33	27.77
	L0815	DC1	9.114	2.457	3.737	28.94	6.93	9.236	2.434	3.833	20.4	6.05	9.052	2.423	3.759	57.78	19.06	9.283	2.426	3.851	85.56	37.4
	L0816	DC1	8.299	2.654	3.142	1.36	0.18	8.916	2.615	3.429	9.68	2.17	7.553	2.223	3.421	5.64	0.72	8.532	2.529	3.389	57.22	18.63
	L0817	DC1	9.745	2.666	3.675	2.15	0.36	9.861	2.597	3.828	1.78	0.3	9.495	2.577	3.708	3.92	1.26	9.822	2.582	3.839	47.04	18.53
	L0818	DC1	8.836	2.892	3.072	71.39	17.15	8.876	3	2.977	96.91	39.09	8.651	2.993	2.895	89.31	38.12	8.941	3.011	2.984	96.11	42.05
	L0819	DC1	8.746	2.819	3.115	44.4	12.5	8.557	2.838	3.034	84.63	22.81	8.378	2.776	3.03	42.6	11.31	8.913	2.866	3.123	84.28	29.94
	L0820	DC1	8.485	2.917	2.923	67.41	14.33	8.453	2.968	2.859	97.99	38.75	8.253	2.806	2.956	61.23	17.2	8.714	2.943	2.975	96.93	38.56
	L0821	DC1	8.205	2.653	3.11	36.79	8.83	8.588	2.63	3.293	13.25	2.92	8.346	2.627	3.207	91.38	42.55	8.569	2.791	3.087	59.45	17.44
	L0822	DC1	8.222	2.734	3.023	25.06	4.08	8.378	2.623	3.217	15.9	3.97	8.3	2.656	3.135	8.24	1.9	8.599	2.628	3.298	89.54	47.87
	L0823	DC1	9.286	2.265	4.14	1.61	0.16	9.13	2.304	4.002	56.09	14.48	8.771	2.208	3.99	34.2	6.85	8.961	2.239	4.036	44.47	14.62
	L0824	DC1	NA	NA	NA	NA	NA	8.534	2.899	2.959	78.65	23.39	8.322	2.728	3.063	37	11.01	8.441	2.838	2.99	73.59	28.98
	L0825	DC1	9.963	2.744	3.651	31.51	5.35	10.027	2.712	3.727	75.13	21.68	9.673	2.705	3.593	37.3	8.97	9.775	2.624	3.751	75.76	22.34
	L0826	DC1	8.928	2.693	3.328	24.79	5.5	9.05	2.722	3.342	91.61	26.47	8.735	2.673	3.287	NA	NA	9.123	2.729	3.359	96.43	36.62
	L0827	DC1	8.719	2.685	3.259	3.84	0.67	8.602	2.726	3.174	30.39	6.44	8.665	2.762	3.148	61.46	12.33	8.715	2.726	3.212	56.94	14.05
	L0828	DC1	7.907	2.662	2.981	15.76	3.84	7.974	2.602	3.093	5.15	2.18	7.931	2.584	3.082	14.53	6.43	7.983	2.53	3.17	63.67	21.86
	L0829	DC1	NA	NA	NA	NA	NA	9.764	2.572	3.826	34.3	9.66	9.554	2.509	3.83	80.28	29.37	9.549	2.528	3.803	69.78	30.17
	L0830	DC1	8.151	2.666	3.067	15.9	4.05	8.212	2.627	3.154	28.96	7.2	8.268	2.634	3.15	98.56	56.57	8.401	2.668	3.163	66.26	33.58
	L0831	DC1	8.539	2.545	3.371	6.32	1.52	8.945	2.585	3.477	2.57	0.56	8.979	2.542	3.546	41.04	14.51	9.015	2.592	3.498	77.46	34.65
	L0832	DC1	8.292	2.604	3.198	1.63	0.17	8.505	2.615	3.273	0.39	0.02	8.409	2.6	3.244	100	93.35	8.414	2.547	3.321	NA	NA
	L0833	DC1	8.498	2.634	3.253	31.51	6.73	8.489	2.657	3.223	10.13	3.08	8.254	2.639	3.143	60.82	20.56	8.49	2.632	3.248	80.54	32.25
	L0834	DC1	8.882	2.685	3.33	3.71	0.97	9.074	2.693	3.392	3.5	0.79	8.744	2.632	3.33	28.15	7.16	9.183	2.669	3.459	30.56	12.88
	L0835	DC1	8.684	2.536	3.439	34.08	8.13	8.789	2.585	3.418	15.03	3.01	8.619	2.556	3.378	55.29	16.93	8.761	2.593	3.396	96.91	50.59
	L0836	DC1	9.179	3.163	2.91	49.75	13.36	9.251	3.072	3.03	84.7	29.86	9.178	2.931	3.145	9.67	1.69	9.376	3.058	3.086	90.63	40.64
	L0837	DC1	7.675	2.638	2.931	10.4	2.44	7.757	2.814	2.772	97.37	49.21	6.695	2.38	2.818	98.43	54.21	7.91	2.848	2.789	90.71	35.85
	L0838	DC1	7.652	2.663	2.892	17.35	2.49	7.714	2.604	2.98	4.35	0.84	7.591	2.596	2.942	98.87	64.39	7.631	2.582	2.973	62.62	22.55
	L0839	DC1	8.212	3.014	2.733	10.52	1.99	8.462	3.016	2.82	41.85	9.12	8.127	2.845	2.876	12.99	3.03	8.425	2.956	2.865	88.81	31.7
	L0840	DC1	8.224	2.811	2.94	11.74	2.25	8.385	2.873	2.934	43.54	12.13	9.209	2.595	3.555	33.04	6.95	9.335	2.58	3.636	88.85	38.47
	L0841	DC1	8.471	2.632	3.23	4.05	0.57	8.632	2.687	3.246	56.99	16.37	8.101	2.643	3.077	47.43	14.04	8.658	2.808	3.094	78.57	31.48
	L0842	DC1	7.817	2.709	2.899	19.6	4.66	8.174	2.848	2.88	79.06	20.78	7.988	2.767	2.894	NA	NA	7.998	2.736	2.935	72.23	33.3
	L0843	DC1	NA	NA	NA	NA	NA	8.113	2.436	3.355	9.18	1.98	7.998	2.39	3.358	37	7.93	7.993	2.435	3.301	87.52	40.51
	L0844	DC1	9.332	2.575	3.651	10.73	2.66	9.543	2.647	3.633	7.57	1.66	9.389	2.712	3.475	95.46	41.58	9.657	2.643	3.673	59.86	18.16
	L0845	DC1	8.943	2.59	3.47	16.53	4.34	8.964	2.693	3.363	81.83	31.72	9.077	2.568	3.544	30.86	7.48	9.124	2.589	3.54	90.3	40.94
	L0846	DC1	8.227	2.676	3.089	10.51	2.65	8.415	2.788	3.029	64.77	18.21	8.331	2.725	3.064	91.61	34.78	8.75	2.748	3.197	77.77	25.27
	L0847	DC1	8.687	3.04	2.874	4	1.32	8.909	2.868	3.116	88.6	25.33	8.734	2.821	3.106	52.43	11.07	8.786	2.767	3.204	57.83	16.52
	L0848	DC1	7.819	2.423	3.248	6.73	1	9.153	2.414	3.838	0.88	0.06	8.822	2.367	3.747	10.09	1.34	8.681	2.318	3.776	34.21	8.49
	L0849	DC1	8.089	2.67	3.044	2.76	0.33	8.018	2.72	2.967	20.2	4.3	8.302	2.69	3.099	33.18	7.3	8.276	2.62	3.178	40.7	10.7
	L0850	DC1	8.111	2.782	2.937	41.38	10.28	7.9	2.585	3.077	10.62	2.44	7.695	2.586	2.985	66.56	27.04	7.996	2.625	3.061	63.69	24.67
	L0851	DC1	NA	NA	NA	NA	NA	8.871	3.037	2.934	NA	NA	8.422	2.992	2.827	42.58	8.32	8.505	2.865	2.989	61.51	13.95
	L0852	DC1	8.45	3.041	2.786	71.16	17.85	NA	NA	NA	NA	NA	7.157	2.955	2.433	68.22	19.75	8.779	2.881	3.073	86.34	41.89
	L0853	DC1	7.026	2.961	2.383	49.37	11.83	7.254	2.947	NA	93.59	35.91	8.427	3.009	2.81	78.9	30.87	7.26	2.9	2.517	86.73	33.48
	L0854	DC1	9.309	2.697	3.466	6.1	0.78	9.349	2.683	3.502	14.41	2.7	9.295	2.605	3.582	14.8	3.39	8.87	2.669	3.382	85.61	31.32
	L0855	DC1	NA	NA	NA	NA	NA	8.807	2.594	3.412	3.92	0.8	8.697	2.636	3.313	47.1	13.5	8.707	2.533	3.454	46.61	16.44
	L0856	DC1	NA	NA	NA	NA	NA	8.784	2.898	3.049	98.72	45.72	7.561	2.471	3.071	NA	NA	8.834	2.879	3.083	91.93	37.51
	L0858	DC1	9.201	2.842	3.255	4.38	0.4	9.473	2.856	3.337	13.25	2.62	9.278	2.752	3.383	12.75	1.34	9.198	2.805	3.307	60.11	13.79
	L0859	DC1	9.792	2.299	4.287	22.39	4.62	10.134	2.412	4.231	88.07	44.14	9.249	2.352	3.965	64.58	21.85	9.876	2.404	4.143	77.94	44.72
	L0860	DC1	8.989	2.481	3.655	13.87	6.16	9.319	2.554	3.687	8.42	2.23	9.088	2.56	3.562	45.88	9.34	9.289	2.604	3.591	67.11	23.62
	L0861	DC1	8.012	2.608	3.088	9.09	1.54	8.173	2.668	3.083	4.92	1.18	8.172	2.577	3.185	15.79	3.85	8.249	2.582	3.224	91.69	44.01
	L0862	DC1	8.671	2.624	3.319	32.62	6.91	8.041	2.705	2.984	70.56	21.35	7.853	2.582	3.054	63.99	18.38	7.978	2.679	2.992	89.68	38.59
	L0863	DC1	8.689	3.162	2.756	80.42	24.71	8.643	3.099	2.797	91.07	29.21	8.334	2.991	2.796	100	78.32	8.781	3.068	2.871	97.04	43.92
	L0864	DC1	8.534	2.524	3.405	1.47	0.17	8.797	2.55	3.47	5.76	1.34	8.593	2.456	3.513	49.85	13.43	8.602	2.513	3.448	53.09	20.81
	L0865	DC1	8.947	2.572	3.498	2.02	0.26	9.322	2.62	3.583	24.64	7	8.999	2.518	3.59	17.01	3.36	9.201	2.596	3.57	63.91	25.25
	L0866	DC1	8.392	2.739	3.081	29.12	6.94	8.462	2.708	3.143	NA	NA	8.332	2.644	3.166	82.02	35.7	8.651	2.685	3.244	77.76	27.25
	L0867	DC1	7.621	2.756	2.771	7.11	1.32	7.718	2.813	2.754	NA	NA	7.538	2.649	2.859	NA	NA	7.597	2.697	2.827	NA	NA
	L0868	DC1	NA	NA	NA	NA	NA	8.331	2.484	3.374	8.06	2.39	NA	NA	NA	62.19	15.14	8.341	2.534	3.305	77.06	29.01
	L0869	DC1	9.658	2.244	4.346	44.12	10.9	9.787	2.291	4.315	94.1	44.22	9.456	2.228	4.284	63.67	23.6	9.748	2.238	4.404	98.16	58.15
	L0870	DC1	9.825	2.707	3.648	39.19	7.26	9.945	2.7	3.716	85.64	19.75	9.683	2.663	3.655	96.68	52.27	9.468	2.691	3.543	94.44	42.01
	L0871	DC1	8.468	3.002	2.832	50.48	7.94	8.773	3.118	2.823	96.49	34.86	8.603	2.991	2.888	98.39	67.54	8.738	3.001	2.925	97.24	49.86
	L0872	DC1	9.189	2.441	3.79	14.58	2.26	9.066	2.397	3.815	26.1	8.97	8.985	2.359	3.825	27.64	5.47	9.174	2.32	3.984	59.09	23.05
	L0873	DC1	8.103	2.732	2.976	8.77	2.3	8.419	2.69	3.14	31.44	8.59	8.971	2.66	3.386	49.15	18.02	9.385	2.46	3.84	NA	NA
	L0874	DC1	8.921	2.521	3.558	0.26	0.02	9.021	2.537	3.575	79.24	61.41	9.135	2.484	3.697	98.03	77.66	9.705	2.505	3.902	NA	NA
	L0875	DC1	7.994	2.35	3.42	16.23	4.07	8.356	2.349	3.578	92.93	45.41	8.192	2.29	3.591	84.01	33.09	8.281	2.262	3.683	88.7	38.76
	L0876	DC1	9.187	2.929	3.151	14.69	2.08	9.422	2.867	3.309	31.77	5.35	9.012	2.672	3.395	28.39	7.12	8.929	2.627	3.41	57.15	16.73
	L0877	DC1	NA	NA	NA	28.08	5.91	7.738	2.628	2.961	0.83	0.11	7.877	2.713	2.91	99.4	87.76	7.973	2.57	3.116	NA	NA
	L0878	DC1	8.144	2.587	3.169	9.54	1.7	8.279	2.653	3.137	17.88	4.03	8.335	2.664	3.136	73.85	26.5	8.363	2.603	3.23	NA	NA
	L0879	DC1	9.481	2.337	4.09	NA	NA	9.732	2.367	4.142	92.83	42.92	9.271	2.325	4.011	97.83	64.72	9.71	2.264	4.336	94.9	48.77
	L0880	DC1	8.594	2.254	3.841	1.2	0.1	8.894	2.429	3.698	NA	NA	8.518	2.22	3.861	100	91.69	8.76	2.291	3.85	NA	NA
	L0881	DC1	9.021	2.773	3.282	0.5	0.03	9.141	2.903	3.177	5.44	0.9	8.986	2.75	3.287	99.27	88.28	9.228	2.857	3.266	NA	NA
	L0882	DC1	7.504	2.92	2.578	4.77	1.21	7.741	2.954	2.646	4.66	0.87	7.6	2.987	2.549	15.14	4.07	7.631	2.936	2.614	35.24	8.85
	L0883	DC1	8.861	2.421	3.697	5.27	0.57	9.309	2.519	3.719	3.01	0.82	8.972	2.461	3.656	59.97	16.69	9.257	2.452	3.807	21.81	6.17
	L0884	DC1	9.093	2.877	3.175	58.66	12.81	9.174	2.917	3.169	96.82	43.24	8.933	2.91	3.081	54.44	11.81	9.269	2.967	3.145	95.69	49.12
	L0885	DC1	8.672	2.441	3.568	10.43	1.67	8.798	2.62	3.374	9.34	2.11	8.647	2.512	3.455	67.94	21.28	8.939	2.63	3.416	53.79	18.07
	L0886	DC1	9.314	2.639	3.562	14.71	3.44	9.755	2.702	3.631	19.54	4.09	9.4	2.609	3.63	79.78	29.63	9.362	2.631	3.583	60.98	21.67
	L0887	DC1	8.135	2.863	2.851	13.26	2.09	8.407	2.853	2.961	4.15	1.06	8.036	2.851	2.826	28.73	6.8	8.275	2.769	3.004	41.85	11.47
	L0888	DC1	7.983	2.883	2.776	37.16	7.37	8.035	2.896	2.787	53.1	11.65	8.014	2.935	2.738	64.41	20.93	8.343	2.963	2.823	77.08	29.8
	L0889	DC1	8.331	2.664	3.147	15.93	3.45	8.174	2.656	3.094	73.57	23.9	8.215	2.611	3.161	21.51	4.78	8.248	2.635	3.146	84.84	32.12
	L0890	DC1	8.672	2.771	3.139	8.71	1.58	8.777	2.828	3.116	42.98	8.24	8.562	2.735	3.138	17.83	4.2	9.017	2.807	3.224	74.07	22.05
	L0891	DC1	8.895	3.021	2.951	8.84	1.58	9.09	2.936	3.114	60.42	14.68	8.63	2.847	3.035	10.5	2.05	9.031	2.839	3.196	89.51	26.91
	L0892	DC1	8.211	2.984	2.761	94.82	25.77	8.508	3.01	2.835	100	43.28	8.107	2.873	2.829	99.29	57.72	8.652	3.08	2.819	100	67.8
	L0893	DC1	8.148	2.485	3.295	12.08	1.91	8.477	2.564	3.325	13.34	2.98	8.112	2.478	3.288	82.38	33.3	8.522	2.491	3.44	63.52	26.43
	L0894	DC1	8.524	3.002	2.851	82.73	23.01	8.654	2.973	2.928	88.2	32.62	8.617	2.98	2.908	59.07	13.4	8.739	2.983	2.943	95.21	41.03
	L0895	DC1	9.377	2.764	3.409	82.63	23.93	9.674	2.73	3.571	86.22	34.9	9.145	2.635	3.49	96.35	48.85	9.519	2.713	3.527	98.97	63.53
	L0896	DC1	8.853	2.647	3.36	6.7	1.81	8.981	2.658	3.399	59.94	18.41	9.115	2.65	3.454	39.15	12.39	9.016	2.655	3.414	65.01	24.11
	L0897	DC1	10.093	2.547	3.984	5.27	0.62	10.194	2.5	4.104	47.93	12.41	9.943	2.47	4.045	85.63	35.27	10.35	2.386	4.362	80.15	30.77
	L0898	DC1	9.108	2.831	3.241	28.52	5.89	9.118	2.78	3.298	13.37	3.77	9.081	2.735	3.333	99.54	64.55	9.194	2.759	3.347	85.14	42.24
	L0899	DC1	NA	NA	NA	NA	NA	9.475	2.545	3.754	89.26	28.76	9.279	2.412	3.866	21.42	4.54	9.707	2.531	3.865	90.78	42.63
	L0900	DC1	9.263	2.589	3.597	2.9	0.4	9.429	2.75	3.448	1.46	0.16	9.263	2.63	3.542	100	92.79	9.716	2.811	3.476	NA	NA
	L0901	DC1	8.551	2.805	3.061	55.9	14.88	8.793	2.752	3.215	90.64	27.56	8.976	2.289	3.948	97.83	48.28	8.783	2.757	3.205	94.03	40.79
	L0902	DC1	8.146	2.969	2.748	48.66	7.83	8.293	3.084	2.696	82.87	19.54	8.54	2.947	2.919	82.82	37.96	8.826	2.831	3.144	58.27	21.5
	L0903	DC1	8.769	2.516	3.506	17.44	3.24	9.049	2.491	3.654	67.05	25.37	8.735	2.569	3.428	63.85	18.97	9.148	2.482	3.71	58.01	24.16
	L0904	DC1	9.426	2.473	3.85	0.21	0.04	9.569	2.433	3.956	9.87	1.59	9.21	2.348	3.944	10.08	1.64	9.317	2.355	3.99	61.26	22.32
	L0905	DC1	8.322	3.25	2.568	7.76	1.5	8.363	3.16	2.659	68.59	17.94	8.226	3.161	2.609	46.93	11.37	8.3	3.075	2.71	87.38	21.38
	L0906	DC1	8.568	2.761	3.118	6.54	1.35	8.69	2.774	3.15	66.05	16.38	8.597	2.795	3.086	66.2	24.01	8.992	2.827	3.201	73.96	28.86
	L0907	DC1	8.273	2.799	2.973	32.22	6.86	8.463	2.692	3.162	7.22	1.51	8.299	2.635	3.16	60.33	15.82	8.411	2.599	3.26	62.9	20.98
	L0908	DC1	7.956	2.366	3.388	10.99	1.88	8.292	2.536	3.311	16.51	3.4	8.23	2.301	3.592	57.27	18.81	9.099	2.359	3.878	64.54	24.76
	L0909	DC1	7.986	3.174	2.523	96.43	NA	NA	NA	NA	NA	NA	8.04	3.097	2.604	98.52	63.73	8.22	3.138	2.626	97.97	51.97
	L0910	DC1	7.459	2.976	2.517	46.49	9.93	7.857	2.878	2.747	85.5	22.92	7.663	2.989	2.571	99	58.86	7.676	2.942	2.617	85.42	31.26
	L0911	DC1	9.34	2.662	3.531	34.42	6.04	9.588	2.703	3.566	76.75	20.63	9.053	2.669	3.397	88.48	33.33	9.465	2.708	3.517	96.41	48.16
	L0912	DC1	8.439	2.719	3.118	14.88	3.37	8.37	2.753	3.053	86.88	33.67	7.209	2.313	3.132	NA	NA	8.655	2.788	3.125	85.04	32.89
	L0913	DC1	9.114	3.067	2.988	75.78	26.1	8.837	2.857	3.109	86.25	38.94	8.634	2.949	2.94	98.36	70.43	9.233	2.94	3.156	100	64.46
	L0914	DC1	9.613	2.633	3.681	3.2	0.28	8.706	2.555	3.422	28.92	6.84	7.299	2.121	3.458	36.52	7.9	8.668	2.529	3.446	59.7	20.88
	L0915	DC1	NA	NA	NA	NA	NA	9.262	2.543	3.671	10.8	2.6	8.151	2.134	3.84	9.47	2.18	9.363	2.541	3.712	47.92	14.59
	L0916	DC1	8.779	2.717	3.244	7.3	1.21	8.877	2.659	3.356	19.38	3.08	NA	NA	NA	14.13	2.45	8.867	2.617	3.412	69.37	21.04
	L0918	DC1	8.271	2.541	3.27	16.39	4.16	8.36	2.451	3.433	5.67	1.29	8.172	2.506	3.276	37.27	7.69	8.3	2.405	3.467	77.82	23.55
	L0919	DC1	NA	NA	NA	NA	NA	9.433	2.715	3.503	7.95	1.15	9.146	2.709	3.393	73.09	48.86	9.462	2.636	3.622	66.41	42.21
	L0920	DC1	8.579	2.971	2.897	46.57	9.25	9.144	3.008	3.054	86.85	28.79	8.824	2.979	2.975	100	85.21	9.098	3.006	3.042	94.98	41.94
	L0921	DC1	7.837	2.631	2.989	17.63	2.64	7.894	2.612	3.038	64.15	17.7	7.735	2.657	2.922	65.75	21.61	7.945	2.593	3.078	86.63	32.83
	L0922	DC1	8.291	2.633	3.159	7.89	1.19	8.496	2.705	3.162	91.58	39.2	8.489	2.614	3.258	NA	NA	8.629	2.592	3.359	86.71	39.13
	L0923	DC1	NA	NA	NA	NA	NA	8.886	2.606	3.447	4.21	0.59	9.024	2.822	3.215	38.27	7.65	8.763	2.711	3.26	76.94	26.84
	L0924	DC1	9.539	2.547	3.777	4.14	0.85	9.806	2.533	3.907	44.62	10.26	9.694	2.454	3.98	8.5	1.76	10.104	2.471	4.115	75.15	28.48
	L0926	DC1	8.306	2.528	3.311	7.5	1.31	8.33	2.6	3.224	17.2	3.37	8.4	2.575	3.275	95.26	46.22	8.792	2.688	3.286	85.33	36.08
	L0927	DC1	8.32	2.959	2.823	92.67	NA	8.478	2.879	2.96	99.25	53.52	8.314	2.946	2.831	99.68	63.45	8.819	3.059	2.888	100	67.97
	L0928	DC1	9.289	2.672	3.492	18.51	3.01	9.469	2.653	3.587	69.49	18.61	9.411	2.596	3.635	54.69	15.19	9.632	2.671	3.627	82.66	26.77
	L0929	DC1	9.422	2.683	3.528	18.89	3.64	9.563	2.67	3.6	3.26	0.8	9.513	2.695	3.537	77.29	31.77	9.753	2.789	3.512	89.7	38.08
	L0930	DC1	8.309	2.762	3.02	17.74	3.11	8.507	2.853	2.991	90.77	28.27	8.362	2.726	3.075	90.62	33.37	8.636	2.768	3.129	88.24	30.93
	L0931	DC1	8.506	2.442	3.511	15.8	3.52	8.857	2.486	3.589	20.38	6.3	8.704	2.473	3.541	91.6	41.42	8.864	2.607	3.421	91.65	45.45
	L0932	DC1	9.08	2.772	3.285	3.36	0.32	8.97	2.637	3.423	10.07	1.83	9.222	2.656	3.483	16.49	2.09	8.929	2.548	3.528	75.97	26.44
	L0933	DC1	8.242	2.722	3.046	43.49	10.54	8.536	2.654	3.238	63.38	16.74	8.294	2.676	3.109	98.42	62.09	8.636	2.711	3.202	91.7	47.39
	L0935	DC1	NA	NA	NA	NA	NA	8.75	2.755	3.189	25.39	6.89	8.555	2.72	3.176	5.61	1.17	8.657	2.597	3.353	70.81	25.12
	L0937	DC1	7.847	2.563	3.083	10.28	2.24	8.231	2.585	3.206	51.39	18.13	7.114	2.264	3.158	88.63	50.04	8.049	2.499	3.241	74.97	37.56
	L0938	DC1	8.398	2.598	3.251	48.7	9.97	8.538	2.548	3.373	52.61	12.16	8.386	2.565	3.29	99.01	56.2	8.645	2.625	3.315	NA	NA
	L0939	DC1	NA	NA	NA	NA	NA	9.095	2.923	3.132	95.13	28.74	8.91	2.962	3.015	98.64	37.99	9.253	2.903	3.201	95.28	29.16
	L0940	DC1	8.14	2.552	3.204	13.64	2.71	8.366	2.644	3.18	29.25	9.78	8.321	2.616	3.188	10.76	2.33	8.469	2.625	3.242	50.67	19.89
	L0941	DC1	8.505	2.74	3.114	7.59	0.72	8.602	2.779	3.112	1.58	0.27	8.543	2.758	3.108	23.18	3.44	8.765	2.754	3.201	63.18	16.7
	L0942	DC1	7.488	2.746	2.737	2.29	0.32	7.762	2.742	2.842	12.7	2.37	7.766	2.74	2.842	12.72	2.3	7.725	2.584	3.007	67.08	23.04
	L0943	DC1	9.586	2.653	3.642	30.24	4.42	9.612	2.65	3.653	78.18	18.65	9.406	2.662	3.549	47.04	9.25	9.632	2.611	3.711	92.79	36.2
	L0944	DC1	9.72	2.659	3.673	3.17	0.4	9.637	2.602	3.73	14.01	2.58	9.16	2.583	3.566	9.43	2.07	9.786	2.596	3.793	19.61	NA
	L0945	DC1	7.84	2.393	3.298	20.72	3.92	8.115	2.459	3.317	12.53	3.47	7.988	2.412	3.336	32.84	8.33	8.082	2.468	3.291	34.45	10.56
	L0946	DC1	8.217	2.751	3.002	34.46	6.37	8.906	2.582	3.472	77.22	20.71	8.844	2.63	3.374	79.84	30.45	9.215	2.752	3.37	93.3	36.85
	L0947	DC1	8.029	2.729	2.957	3.58	0.61	8.197	2.829	2.91	10.78	2.55	8.093	2.745	2.959	18.69	3.92	8.158	2.749	2.977	53.44	17.7
	L0948	DC1	8.197	2.494	3.305	17.34	2.68	8.581	2.579	3.343	5.77	0.99	8.052	2.682	3.022	97.9	53.72	8.633	2.588	3.354	76.21	28.78
	L0949	DC1	7.832	2.713	2.898	5.3	0.91	8.101	2.787	2.922	6.78	1.77	8.15	2.772	2.95	18.18	3.86	7.967	2.707	2.956	71.3	24.47
	L0950	DC1	8.586	2.302	3.756	25.09	4.17	8.656	2.404	3.631	6.31	1.55	8.764	2.411	3.654	86.94	35.27	8.71	2.477	3.538	60.56	22.95
	L0951	DC1	9.102	2.917	3.131	48.67	11.52	9.244	2.978	3.125	80.27	25.31	7.914	2.585	3.071	91.81	41.02	9.411	2.928	3.233	96.35	46
	L0952	DC1	8.287	2.392	3.493	9.5	1.67	8.564	2.536	3.395	29.01	7.46	8.394	2.431	3.466	88.29	34.19	8.449	2.476	3.432	72.74	25.77
	L0953	DC1	7.791	2.516	3.118	6.77	1.15	8.034	2.589	3.123	48.96	11.41	6.995	2.194	3.199	32.65	9.54	8.043	2.588	3.13	60.42	20.64
	L0955	DC1	7.923	2.759	2.886	36.81	5.42	8.272	2.807	2.969	90.63	25.31	8.171	2.245	3.654	18.26	2.53	9.657	2.565	3.788	84.84	32.17
	L0956	DC1	9.981	2.561	3.93	5.64	0.72	10.291	2.652	3.911	9.03	1.69	10.03	2.605	3.868	7.28	1.42	10.289	2.558	4.05	32.27	8.73
	L0957	DC1	8.432	2.485	3.413	6.27	0.78	8.525	2.799	3.063	95.54	32.44	8.557	2.755	3.114	91.69	46.52	8.548	2.867	2.995	99.09	50.78
	L0958	DC1	8.309	2.596	3.222	0.83	0.22	8.356	2.597	3.236	4.82	1.18	8.346	2.578	3.254	8.3	1.31	8.513	2.537	3.378	NA	NA
	L0959	DC1	8.904	2.764	3.234	12.57	2.77	8.935	2.812	3.195	59.88	15.03	8.689	2.753	3.165	60.5	16.09	9.376	2.864	3.288	87.09	29.99
	L0960	DC1	8.958	2.621	3.442	5.48	0.6	9.29	2.669	3.503	0.27	0.03	9.128	2.679	3.419	100	92.02	9.437	2.665	3.562	96.62	72.22
	L0961	DC1	8.923	2.777	3.233	20.31	3.21	9.24	2.819	3.309	71.43	26.76	8.837	2.766	3.205	21.6	5.02	9.309	2.893	3.23	NA	NA
	L0962	DC1	9.547	2.666	3.611	2.94	0.83	9.55	2.717	3.541	74.48	21.75	9.217	2.518	3.678	11.16	2.91	9.859	2.584	3.844	72.16	35.7
	L0963	DC1	NA	NA	NA	NA	NA	9.771	2.817	3.492	3.19	0.78	9.549	2.822	3.4	NA	NA	9.789	2.756	3.574	37.6	9.37
	L0964	DC1	9.422	3.014	3.143	50.39	8.4	10.002	2.63	3.83	1.59	0.27	9.437	2.667	3.575	16.36	2.29	9.461	2.734	3.488	NA	NA
	L0965	DC1	8.648	3.003	2.89	23.72	3.18	8.771	3	2.936	96.34	33.53	8.778	2.871	3.069	60.58	21.14	9.062	2.885	3.156	100	46.08
	L0967	DC1	8.413	2.981	2.839	NA	NA	8.94	2.894	3.132	62.64	22.07	8.457	3.05	2.779	96.18	54.33	8.696	2.958	2.955	85.59	42.9
	L0968	DC1	9.986	2.591	3.878	15.03	1.56	9.403	3.024	3.131	89.26	27.1	9.377	2.978	3.17	85.69	26.06	9.338	2.931	3.209	98.11	42.06
	L0969	DC1	NA	NA	NA	NA	NA	8.883	3.099	2.876	87.63	25.43	8.73	3.164	2.764	99.7	56.84	8.92	2.844	3.193	92.16	36.39
	L0970	DC1	NA	NA	NA	NA	NA	9.163	2.87	3.212	78.75	24.67	9.034	2.838	3.194	98.33	53.81	9.337	2.851	3.303	97.86	48.86
	L0972	DC1	8.685	2.704	3.233	7.22	0.92	8.665	2.756	3.161	34.68	5.35	8.548	2.721	3.153	64.83	15.17	8.634	2.683	3.243	83.54	27.95
	L0973	DC1	9.055	3.183	2.858	9.53	1.36	9.358	3.241	2.899	83.26	29.3	8.782	3.124	2.819	74.88	21.15	9.214	3.092	2.988	88.43	24.54
	L0974	DC1	8.154	2.989	2.741	10.99	1.88	8.227	3.122	2.645	83.49	34.56	8.228	3.109	2.652	95.91	50.34	8.392	3.079	2.738	86.26	34.69
	L0975	DC1	NA	NA	NA	NA	NA	9.151	2.95	3.121	11.28	1.42	8.792	3.147	2.811	100	87.3	8.988	2.917	3.1	98.74	NA
	L0976	DC1	8.321	2.836	2.95	21.29	3.65	8.383	2.994	2.806	91.55	30.02	8.247	2.934	2.818	30.19	4.96	8.222	2.921	2.83	86.99	31.46
	L0977	DC1	8.287	2.79	2.977	26.61	4.48	8.03	2.903	2.779	59.4	13.1	7.996	2.855	2.808	41.05	7.15	8.106	2.854	2.852	80.95	36.91
	L0978	DC1	NA	NA	NA	NA	NA	9.117	2.924	3.137	17.73	3.28	8.875	2.977	2.989	48.91	11.49	9.101	2.843	3.219	92.97	32.91
	L0979	DC1	8.471	2.748	3.1	6.25	0.95	NA	NA	NA	NA	NA	8.334	2.751	3.038	100	91.42	8.558	2.808	3.064	93.68	72.66
	L0980	DC1	NA	NA	NA	NA	NA	8.891	3.084	2.901	69.93	16.11	8.746	2.924	3.003	26.96	4.77	8.803	2.871	3.086	71.83	17.28
	L0981	DC1	8.223	2.491	3.317	28.83	5.86	9.58	2.733	3.531	9.08	1.49	8.94	2.65	3.396	20.07	3.38	9.301	2.624	3.564	79.43	18.02
	L0982	DC1	8.214	2.737	3.015	19.76	7.04	8.494	2.888	2.956	81.22	25.2	8.267	2.858	2.901	54.13	16.21	8.616	2.879	3.002	NA	NA
	L0983	DC1	7.801	2.56	3.062	4.46	0.75	8.172	2.684	3.06	55.94	19.79	8.224	2.587	3.194	21.21	5.26	8.964	2.585	3.52	34.39	10.96
	L0984	DC1	8.231	2.855	2.897	12.96	1.93	8.478	2.883	2.959	81.24	27.51	7.666	2.301	3.347	6.18	1.31	9.406	2.552	3.709	29.84	6.32
	L0985	DC1	8.614	2.72	3.187	60.35	12.48	8.88	2.78	3.211	91.88	31.18	8.525	2.473	3.46	85.3	32.98	9.118	2.558	3.591	94.78	45.21
	L0986	DC1	8.694	3.107	2.81	29.98	3.89	9.039	3.213	2.823	88.74	26.92	9.053	3.132	2.9	90.48	31.8	NA	NA	NA	90.95	25.6
	L0987	DC1	9.508	3.035	3.15	8.95	1.87	9.6	2.965	3.259	26.13	7.87	9.555	3.007	3.186	43.45	10.15	9.821	2.94	3.359	90.06	29.6
	L0989	DC1	9.344	2.705	3.471	1.14	0.16	9.726	2.773	3.522	24.93	4.21	9.667	2.705	3.585	5.85	0.94	9.422	2.627	3.612	49.19	14.77
	L0990	DC1	8.457	2.499	3.403	12.78	3	8.423	2.536	3.344	46.33	15.57	8.326	2.499	3.347	22.92	7.32	8.658	2.536	3.438	74.2	32.23
	L0991	DC1	8.854	2.519	3.543	12.12	1.73	8.449	2.585	3.289	76.46	21.37	8.347	2.489	3.365	74.75	29.51	8.53	2.548	3.363	94.75	44.77
	L0992	DC1	8.87	2.712	3.292	63.18	12.12	8.856	2.744	3.251	81.25	21.95	8.774	2.662	3.311	81.68	27.21	9.001	2.661	3.403	91.79	43.39
	L0993	DC1	8.938	3.122	2.876	86.7	18.68	9.022	3.1	2.924	99.14	38.66	8.723	3.026	2.889	100	56.19	9.095	3.004	3.04	100	46.47
	L0994	DC1	NA	NA	NA	NA	NA	8.899	2.674	3.342	2.73	0.55	8.172	2.747	2.985	38.99	7.81	8.712	2.595	3.378	27.68	9.18
	L0995	DC1	8.912	2.471	3.639	24.36	7.24	9.147	2.511	3.659	10.61	2.5	8.539	2.509	3.414	73.04	25.08	9.21	2.541	3.646	81.94	32.01
	L0996	DC1	NA	NA	NA	NA	NA	8.422	2.783	3.042	9.53	2.36	8.456	2.939	2.884	48.75	9.24	8.43	2.784	3.042	58.41	9.84
	L0997	DC1	NA	NA	NA	NA	NA	8.805	2.708	3.274	15.79	3.75	8.814	2.759	3.204	24.17	5.57	8.618	2.558	3.388	61.38	16.92
	L0998	DC1	9.25	2.862	3.245	63.67	14.71	9.556	2.962	3.246	93.05	28.89	9.449	2.778	3.434	85.25	34.8	9.673	2.653	3.697	88.85	42.14
	L1000	DC1	8.269	2.615	3.179	9.65	2.54	8.568	2.637	3.27	65.14	15.26	8.352	2.613	3.209	70.22	20.38	8.827	2.71	3.277	79.57	21.12
	L1001	DC1	NA	NA	NA	NA	NA	8.499	3.174	2.691	90.37	28.25	8.389	3.174	2.651	79.67	21.27	8.453	3.132	2.711	94.15	29.39
	L1002	DC1	9.313	2.37	3.953	8.16	1.81	9.672	2.535	3.843	77.32	23.92	9.172	2.415	3.817	23.97	5.26	9.593	2.464	3.935	83.43	33.61
	L1003	DC1	NA	NA	NA	NA	NA	8.897	2.658	3.361	59.03	14.47	NA	NA	NA	100	91.33	8.815	2.566	3.456	92.91	73.12
	L1004	DC1	8.432	2.597	3.264	47.29	8.64	8.625	2.772	3.133	89.91	22.92	8.506	2.692	3.17	82.02	28.58	8.673	2.784	3.135	82.52	27.99
	L1005	DC1	NA	NA	NA	NA	NA	9.113	2.595	3.535	73.5	20.58	8.915	2.564	3.497	72.9	22.59	9.345	2.597	3.622	77.21	22.48
	L1006	DC1	8.09	2.912	2.784	0.7	0.1	8.206	2.892	2.85	23.23	4.68	8.303	2.842	2.932	NA	NA	8.159	2.782	2.943	19.77	5.78
	L1007	DC1	NA	NA	NA	NA	NA	8.452	3.045	2.792	30.59	6.76	8.378	3.099	2.71	64.39	16.8	8.54	3.038	2.823	46.45	9.59
	L1008	DC1	NA	NA	NA	NA	NA	9.771	2.732	3.602	21.58	3.07	9.256	2.73	3.409	29.38	4.35	9.783	2.667	3.692	53.1	14.45
	L1009	DC1	9.048	2.668	3.414	0.65	0.09	9.558	2.635	3.651	2.94	0.64	9.127	2.623	3.499	9.27	1.72	9.381	2.639	3.578	33.92	7.5
	L1010	DC1	NA	NA	NA	NA	NA	9.25	2.884	3.228	35.74	8.83	9.13	2.894	3.166	36.11	7.01	9.28	2.88	3.239	88.12	24.18
	L1011	DC1	8.941	2.439	3.692	12.53	2.54	9.155	2.557	3.611	28.93	10.74	8.913	2.449	3.659	68.57	26.5	9.095	2.584	3.545	45.95	14.67
	L1013	DC1	NA	NA	NA	NA	NA	10.62	2.731	3.914	26.24	4.17	9.865	2.767	3.586	39.35	6.32	10.417	2.677	3.924	75.38	20.48
	L1014	DC1	8.767	2.496	3.535	22.84	3.14	8.995	2.68	3.376	13.16	2.98	8.536	2.499	3.438	87.19	33.58	9.037	2.647	3.44	75.57	27.59
	L1015	DC1	8.666	2.596	3.357	0.85	0.21	8.887	2.638	3.385	24.96	4.91	8.652	2.552	3.401	14.91	1.76	8.816	2.476	3.583	72.71	24.93
	L1016	DC1	8.075	2.601	3.122	4.84	0.96	8.155	2.659	3.082	18.18	4.67	8.206	2.594	3.179	47.58	11.19	8.265	2.591	3.212	71.53	27.1
	L1018	DC1	8.168	2.362	3.48	30.5	7.65	8.57	2.53	3.42	77.71	28.86	8.435	2.48	3.414	76.95	24.94	8.716	2.547	3.444	85.53	33.43
	L1019	DC1	NA	NA	NA	NA	NA	10.143	2.534	4.026	65.18	18.97	9.611	2.485	3.882	47.68	11.92	9.629	2.492	3.897	73.57	30.22
	L1020	DC1	8.953	2.307	3.914	7.5	4.22	9.157	2.33	3.966	16.49	4.53	9.058	2.287	3.982	18.09	3.81	9.014	2.291	3.966	63.53	23.08
	L1021	DC1	NA	NA	NA	NA	NA	8.156	3.062	2.68	94.42	26.76	8.144	2.964	2.773	72.33	16.22	8.313	2.946	2.862	97.03	37.59
	L1022	DC1	NA	NA	NA	NA	NA	8.876	3.144	2.837	76.02	18.25	8.727	3.062	2.859	84.73	21.85	9.169	3.15	2.921	87.33	26.07
	L1023	DC1	8.286	2.416	3.448	9.74	1.37	8.426	2.554	3.315	76.57	27.28	8.217	2.428	3.402	47.36	11.48	8.684	2.504	3.489	68.98	29.35
	L1024	DC1	8.38	2.435	3.458	19.53	3.09	8.506	2.557	3.36	41.72	8.98	8.297	2.525	3.293	95.22	40.58	8.597	2.566	3.361	90.22	34.64
	L1025	DC1	8.256	2.627	3.156	NA	NA	8.47	2.576	3.311	0.34	0.07	8.247	2.618	3.164	100	93.48	8.265	2.423	3.432	NA	NA
	L1026	DC1	9.08	2.572	3.559	35.62	5.35	9.134	2.621	3.514	66.08	16.94	9.363	2.702	3.474	86.92	33.81	9.435	2.568	3.697	71.34	21.59
	L1027	DC1	NA	NA	NA	NA	NA	8.652	2.802	3.102	0.57	0.05	8.443	2.86	2.965	95.98	71.28	8.399	2.665	3.167	NA	NA
	L1028	DC1	NA	NA	NA	NA	NA	9.263	2.848	3.274	44.16	14.19	8.971	2.788	3.224	37.29	10.58	9.144	2.761	3.33	78.22	24.68
	L1029	DC1	9.078	2.6	3.513	9.86	1.43	9.073	2.688	3.407	8.8	2.71	8.889	2.57	3.474	57.11	15.2	8.962	2.654	3.403	64.81	22.73
	L1030	DC1	9.488	2.691	3.551	3.44	0.67	9.531	2.788	3.439	45.14	10.87	9.197	2.699	3.414	28.68	6.72	9.097	2.635	3.478	53.39	17.18
	L1031	DC1	NA	NA	NA	NA	NA	9.074	2.975	3.066	0.22	0.04	7.955	2.662	2.995	100	88.94	9.058	2.861	3.191	NA	NA
	L1032	DC1	9.544	2.717	3.533	2.54	0.2	9.623	2.906	3.329	82	19.53	9.47	2.793	3.404	96.9	50.84	9.522	2.806	3.42	93.96	36.4
	L1033	DC1	8.559	3.25	2.646	42.4	6.36	8.802	3.322	2.665	94.46	28.11	8.725	3.213	2.729	NA	NA	8.93	3.196	2.807	94.6	29.68
	L1035	DC1	8.368	2.399	3.523	35.36	8.19	8.785	2.548	3.49	86.09	37.69	8.44	2.665	3.186	84.5	36.58	8.794	2.657	3.328	72.1	29.13
	L1036	DC1	8.965	2.702	3.33	10.1	2.71	9.239	2.779	3.339	72.01	23.84	8.945	2.676	3.351	56.16	16.11	9.266	2.752	3.377	76.78	31.06
	L1037	DC1	8.184	2.764	2.976	4.38	0.9	8.788	2.883	3.062	15.74	3.75	8.465	2.852	2.979	40.84	9.76	8.776	2.801	3.147	69.77	20.9
	L1038	DC1	8.234	2.493	3.322	13.03	3.01	8.915	2.614	3.432	13.47	2.72	8.721	2.51	3.49	33.43	7.49	8.928	2.45	3.67	81.74	27.07
	L1039	DC1	7.98	2.505	3.2	5.44	0.84	8.444	2.579	3.29	99.33	44.73	8.345	2.484	3.373	51.62	13.79	8.322	2.422	3.458	88.51	36.87
	L1040	DC1	8.955	2.659	3.39	3.46	0.63	9.207	2.637	3.519	11.66	2.92	8.964	2.637	3.409	6.21	0.97	9.078	2.596	3.518	62.85	13.85
	L1041	DC1	8.776	2.495	3.537	28.65	6.07	9.164	2.69	3.434	22.15	6.61	9.119	2.6	3.52	61.12	18.2	9.197	2.618	3.537	89.04	44.1
	L1042	DC1	7.791	2.704	2.9	4.53	0.73	8.164	2.799	2.938	14.58	3.32	7.908	2.79	2.844	6.29	1.14	7.792	2.693	2.907	43.4	10.62
	L1043	DC1	NA	NA	NA	NA	NA	8.66	3.193	2.727	76.47	29.59	8.484	3.159	2.694	61.93	18.91	8.846	3.09	2.88	94.54	37.24
	L1044	DC1	9.242	2.643	3.517	14.32	2.3	9.623	2.696	3.608	85.25	32.59	9.624	2.652	3.643	44.37	14.74	10.107	2.69	3.775	94.85	42.72
	L1045	DC1	8.642	2.749	3.155	6.71	1.04	8.928	2.77	3.235	55.74	11.9	8.61	2.82	3.059	84.26	25.06	8.698	2.682	3.262	79.54	23.56
	L1047	DC1	7.931	2.41	3.302	NA	NA	7.601	2.628	2.91	14.05	2.26	6.734	2.304	2.934	63.94	13.61	7.733	2.583	3.014	73.55	28.06
	L1050	DC1	7.988	2.698	2.978	20.91	4.99	8.342	2.764	3.038	46.92	11.53	NA	NA	NA	48.54	15.73	8.463	2.659	3.202	79.88	35.54
	L1051	DC1	NA	NA	NA	NA	NA	8.302	2.742	3.044	5.86	1.23	8.246	2.696	3.07	11.41	2.34	8.055	2.551	3.171	74.56	27.49
	L1052	DC1	9.654	2.489	3.9	6.97	1.05	9.823	2.603	3.815	30.83	5.69	9.891	2.635	3.766	20.16	4.3	10.115	2.552	3.984	39.06	8.41
	L1053	DC1	7.941	2.799	2.848	23.65	4.41	7.958	2.949	2.706	82.57	28.49	7.888	2.87	2.752	83.27	29.15	8.134	2.892	2.821	87.6	36.53
	L1054	DC1	8.34	2.618	3.197	1.77	0.43	9.011	2.651	3.416	5.57	1.38	8.859	2.648	3.366	NA	NA	9.121	2.612	3.518	58.31	22.14
	L1055	DC1	NA	NA	NA	NA	NA	8.297	2.87	2.902	0.39	0.1	8.221	2.984	2.765	NA	NA	8.055	2.927	2.763	NA	NA
	L1061	DC1	9.865	2.974	3.344	61.14	23.05	10.057	3.072	3.292	98.15	58.27	9.829	2.961	3.334	95.4	40.62	9.844	2.946	3.362	99.18	56.71
	L1063	DC2	9.652	2.555	3.801	2.58	0.35	9.905	2.612	3.814	28.27	7.68	9.674	2.55	3.811	22.51	6.97	9.576	2.597	3.713	73.53	21.06
	L1064	DC2	9.204	2.469	3.763	3.81	0.34	9.2	2.444	3.795	7.38	1.41	8.944	2.412	3.721	12.08	3.77	9.226	2.416	3.843	62.57	22.47
	L1065	DC2	9.051	2.493	3.656	0.81	0.07	9.26	2.538	3.677	18.78	4.22	9.227	2.5	3.703	5.46	0.93	9.489	2.502	3.81	58.42	18.94
	L1066	DC2	9.724	2.325	4.229	10.82	2.52	9.868	2.418	4.13	27.26	7.99	9.518	2.425	3.958	45.32	10.17	10.103	2.421	4.195	81.1	35.33
	L1067	DC2	NA	NA	NA	NA	NA	9.646	2.551	3.819	40.71	11.61	9.587	2.47	3.893	37.14	8.24	9.839	2.467	4.007	63.65	25.3
	L1068	DC2	9.148	2.35	3.933	5.29	0.6	9.033	2.316	3.948	17.6	3.17	9.23	2.303	4.029	8.93	1.48	9.279	2.292	4.078	59.41	23.2
	L1069	DC2	9.193	2.404	3.857	9.47	1.51	9.436	2.429	3.911	37.94	8.6	9.478	2.555	3.731	12.43	2.4	9.449	2.468	3.846	60.61	22.29
	L1070	DC2	8.978	2.749	3.282	1.7	0.35	9.173	2.794	3.302	43.02	9.23	9	2.787	3.243	22.75	4.01	9.14	2.682	3.429	71.58	14.83
	L1071	DC2	9.272	2.539	3.679	63.16	15.4	9.424	2.596	3.654	52.51	12.43	9.677	2.611	3.721	48.43	11.79	9.735	2.575	3.801	83.9	35.09
	L1072	DC2	9.442	2.7	3.53	1.14	0.13	9.538	2.897	3.304	NA	NA	9.485	2.694	3.54	NA	NA	9.567	2.743	3.506	100	57.81
	L1073	DC2	NA	NA	NA	NA	NA	9.942	2.658	3.77	34.9	6.66	9.756	2.621	3.743	9.49	1.47	9.804	2.517	3.92	81.18	27.25
	L1074	DC2	9.076	2.368	3.884	48	14.46	9.372	2.27	4.181	29.89	8.48	8.724	2.126	4.129	82.96	34.25	9.506	2.299	4.168	NA	NA
	L1075	DC2	NA	NA	NA	NA	NA	8.754	2.878	3.06	43.01	9.23	NA	NA	NA	NA	NA	8.663	2.884	3.021	100	NA
	L1076	DC2	10.293	2.696	3.838	6.59	0.74	10.371	2.68	3.91	68.97	25.09	9.175	2.361	3.899	21.3	4.35	10.671	2.654	4.046	92.21	39.31
	L1077	DC2	9.761	2.538	3.886	36.69	12.76	9.931	2.727	3.662	98.21	59.89	9.605	2.681	3.625	79.33	48	9.335	2.594	3.628	90.76	57.51
	L1078	DC2	9.446	2.496	3.814	73.24	21.11	10.217	2.666	3.86	51.72	11.4	10.208	2.612	3.936	70.46	28.4	10.556	2.679	3.974	97.98	47.77
	L1079	DC2	9.046	2.198	4.147	29.98	7.67	9.125	2.403	3.848	35.26	10.78	8.822	2.212	4.018	49.96	17.86	9.669	2.288	4.25	67.4	31.79
	L1080	DC2	NA	NA	NA	NA	NA	8.812	2.486	3.571	7.84	1.78	8.692	2.451	3.564	23.52	4.23	8.863	2.46	3.626	47.72	14.1
	L1081	DC2	9.034	2.4	3.785	7.59	0.75	8.781	2.477	3.574	4.95	1.21	8.512	2.474	3.46	19.55	4.32	8.924	2.498	3.593	62.08	22.72
	L1082	DC2	9.434	2.571	3.693	4.88	0.57	9.419	2.517	3.771	21.56	7.03	9.207	2.486	3.713	5.43	1.2	9.427	2.422	3.914	65.99	26.56
	L1083	DC2	NA	NA	NA	NA	NA	9.016	2.619	3.464	7.76	1.94	8.736	2.646	3.323	NA	NA	9.073	2.652	3.442	100	47.58
	L1084	DC2	NA	NA	NA	NA	NA	9.931	2.467	4.071	24.3	8	9.838	2.384	4.156	11.49	2.08	10.069	2.55	3.999	79.77	36.24
	L1085	DC2	9.902	2.557	3.902	17.33	2.87	10.036	2.525	3.999	54.13	13.72	9.605	2.482	3.9	64.23	14.74	10.181	2.544	4.027	93.16	44.1
	L1086	DC2	8.611	2.462	3.521	2.96	0.57	9.71	2.35	4.162	37.05	12.45	9.082	2.354	3.879	34.67	8.04	9.953	2.487	4.031	76.88	35.65
	L1087	DC2	NA	NA	NA	NA	NA	8.204	2.563	3.236	5.79	1.42	NA	NA	NA	NA	NA	8.113	2.538	3.215	47.6	17.3
	L1088	DC2	9.629	2.306	4.206	17.75	3.85	9.706	2.243	4.37	15.98	6.35	9.436	2.273	4.176	28.56	7.02	9.702	2.218	4.408	61.31	20.45
	L1089	DC2	9.643	2.628	3.7	51.17	8.52	10.01	2.668	3.796	51.95	12.79	9.764	2.717	3.616	33.39	9.14	10.026	2.743	3.679	95.31	35.43
	L1090	DC2	NA	NA	NA	NA	NA	9.664	2.743	3.55	34.69	11.11	7.52	2.28	3.312	11.15	2.76	9.527	2.714	3.526	NA	NA
	L1091	DC2	7.844	2.581	3.06	5.52	0.9	8.1	2.609	3.138	7.88	2.06	8.163	2.585	3.177	22.44	5.39	8.221	2.518	3.291	81.48	38.18
	L1092	DC2	8.636	2.365	3.677	6.82	0.93	8.559	2.36	3.676	16.77	5.07	8.499	2.307	3.699	49.63	14.6	8.916	2.305	3.889	56.19	21.65
	L1093	DC2	8.72	2.463	3.559	4.11	0.48	8.653	2.404	3.63	9.09	1.74	8.667	2.383	3.655	36.89	7	8.92	2.357	3.816	81.01	29.46
	L1094	DC2	9.625	2.511	3.868	7.88	0.95	8.828	2.645	3.363	25.63	4.38	8.748	2.669	3.286	100	NA	8.979	2.569	3.532	83.44	49.81
	L1095	DC2	9.758	2.502	3.934	4.46	0.4	9.634	2.542	3.845	12.09	2.57	9.511	2.472	3.868	36.77	10.23	10.034	2.505	4.046	NA	NA
	L1096	DC2	10.085	2.316	4.388	22.56	8.02	10.463	2.428	4.343	13.86	4.33	9.245	2.325	4.004	48.92	17.21	9.84	2.386	4.15	64.4	30.88
	L1097	DC2	10.007	2.627	3.829	41.84	10.99	10.114	2.622	3.881	67.13	17.23	9.982	2.612	3.841	80.1	24.77	10.29	2.634	3.923	81.88	32.09
	L1098	DC2	8.888	2.942	3.033	7.62	0.81	9.938	2.62	3.824	47.27	11.91	9.938	2.648	3.757	96.04	45.3	10.358	2.659	3.92	90.18	39.27
	L1099	DC2	9.753	2.535	3.867	7.17	1.47	10.161	2.503	4.096	40	12.7	9.629	2.564	3.774	NA	NA	9.505	2.514	3.812	76.64	31.05
	L1100	DC2	10.018	2.677	3.795	14.93	3.15	9.966	2.619	3.848	57.01	14.14	9.825	2.572	3.845	85.92	31.07	10.311	2.597	4	85.79	48.31
	L1101	DC2	9.275	2.355	3.974	5.16	0.68	9.56	2.458	3.926	22.97	7.82	9.435	2.427	3.914	18.51	3.4	9.87	2.422	4.105	74.24	26.08
	L1102	DC2	9.964	2.746	3.653	27.09	7.01	10.148	2.84	3.594	53.49	12.34	10.133	2.774	3.678	68.14	28.25	10.334	2.789	3.731	78.07	29.82
	L1103	DC2	9.415	2.538	3.734	62.84	11.27	9.502	2.65	3.61	75.23	20.87	9.671	2.653	3.661	62.27	21.1	9.706	2.564	3.818	NA	NA
	L1104	DC2	10.523	2.45	4.321	14.37	4.4	10.783	2.516	4.33	21.44	5.39	10.397	2.471	4.24	60.1	24.48	10.184	2.57	3.99	85.2	40.64
	L1105	DC2	9.796	2.535	3.894	65.09	19.07	9.836	2.561	3.878	53.53	14.05	9.504	2.529	3.771	69.42	21.36	9.846	2.59	3.829	NA	NA
	L1106	DC2	8.89	2.378	3.767	1.32	0.1	9.221	2.368	3.928	22.71	8.49	8.874	2.31	3.863	24.96	3.61	9.242	2.319	4.026	51.21	18.71
	L1108	DC2	9.516	2.476	3.875	7.85	1.41	9.799	2.561	3.852	36.08	10.28	10.305	2.684	3.858	36.34	10.7	9.926	2.561	3.915	73.77	30.16
	L1109	DC2	10.451	2.624	4.006	20.09	2.92	10.491	2.679	3.935	72.72	20.42	10.431	2.635	3.983	22.54	5	10.763	2.666	4.067	NA	NA
	L1110	DC2	9.577	2.684	3.585	20.82	4.67	9.796	2.701	3.648	88.24	32.33	9.61	2.599	3.714	18.95	3.49	9.511	2.6	3.683	88.4	39.63
	L1111	DC2	10.498	2.536	4.167	45.9	10.44	10.833	2.783	3.928	82.54	35.55	10.039	2.648	3.815	49.96	14.73	10.254	2.623	3.947	94.84	47.44
	L1112	DC2	9.353	2.509	3.765	4.92	0.94	9.632	2.426	4.001	86.34	35.31	9.237	2.442	3.792	22.49	5.48	9.813	2.448	4.029	80.6	31.67
	L1113	DC2	9.451	2.322	4.103	13.36	2.13	9.63	2.384	4.068	14.64	4.88	9.504	2.32	4.126	30.46	5.63	9.727	2.318	4.224	69.34	27.55
	L1114	DC2	9.439	2.325	4.093	10.96	1.86	9.837	2.439	4.066	20.5	5.3	9.587	2.329	4.141	39.24	8.83	9.83	2.32	4.273	89.86	35.44
	L1115	DC2	9.327	2.629	3.583	2.87	0.39	9.907	2.487	4.035	28.64	8.26	9.44	2.573	3.687	26.38	6.4	9.573	2.596	3.725	62.94	24.92
	L1116	DC2	9.751	2.669	3.677	1.06	0.25	9.944	2.642	3.782	15.14	4.72	9.702	2.634	3.702	19.04	4.67	9.899	2.607	3.824	NA	NA
	L1117	DC2	9.796	2.868	3.436	26.87	7.86	9.851	2.831	3.513	99.66	66.01	10.013	2.837	3.54	58.03	19.65	10.019	2.803	3.594	81.09	43.53
	L1119	DC2	10.411	2.579	4.067	98.88	NA	10.345	2.589	4.036	100	56.23	10.179	2.664	3.844	98.99	55.94	10.567	2.618	4.081	97.99	57.4
	L1120	DC2	9.974	2.605	3.862	16.93	3.32	10.006	2.629	3.831	96.76	53.98	9.411	2.452	3.864	87.69	38.39	9.964	2.599	3.871	85.02	40.12
	L1121	DC2	9.858	2.382	4.177	5.05	0.81	10.054	2.432	4.164	39.67	11.39	9.239	2.163	4.306	46.38	12.48	9.84	2.253	4.411	85.57	47.55
	L1122	DC2	9.342	2.247	4.215	14.96	2.63	9.676	2.261	4.324	23.84	8.57	9.075	2.169	4.215	45.1	11.69	9.719	2.342	4.203	92.36	54.55
	L1123	DC2	9.606	2.405	4.026	24.66	4.85	9.873	2.449	4.071	20.46	4.71	9.849	2.399	4.127	43.16	10.05	10.074	2.496	4.084	94.84	48.49
	L1124	DC2	8.732	2.515	3.5	11.11	3.51	9.064	2.405	3.789	24.53	8.93	7.363	2.03	3.648	28.73	6.49	9.1	2.392	3.835	69.56	30.99
	L1125	DC2	9.599	2.448	3.947	14.43	2.59	9.735	2.392	4.096	41.82	10.38	9.331	2.463	3.81	51.67	16.4	9.911	2.456	4.075	98.92	49.6
	L1126	DC2	NA	NA	NA	NA	NA	8.522	2.58	3.333	20.55	5.79	8.267	2.499	3.323	24.94	5.33	8.937	2.639	3.4	76.84	39.35
	L1127	DC2	9.138	2.346	3.925	8.16	1.48	9.351	2.45	3.858	22.8	6.96	7.903	1.997	3.979	34.58	8.15	9.304	2.425	3.866	92.88	55.17
	L1128	DC2	9.293	2.655	3.519	86.44	25.33	9.585	2.702	3.569	92.85	32.88	9.446	2.627	3.615	86.47	26.28	9.562	2.569	3.748	98.22	43.67
	L1129	DC2	8.982	2.685	3.378	3.36	0.42	9.23	2.714	3.427	84.11	31.72	8.351	2.471	3.393	19.46	3.5	8.792	2.592	3.418	94.47	45.35
	L1130	DC2	9.93	2.628	3.805	4.26	0.54	10.068	2.661	3.812	93.5	40.28	9.915	2.661	3.747	38.23	8.71	9.996	2.603	3.869	94.78	38.99
	L1131	DC2	9.118	2.488	3.69	9.26	1.17	9.418	2.538	3.731	20.64	5.73	8.916	2.476	3.623	41.87	9.9	9.386	2.47	3.825	79.63	30.83
	L1132	DC2	9.002	2.479	3.662	2.17	0.88	8.925	2.527	3.551	17.11	4.36	7.554	2.089	3.638	11.68	1.94	8.985	2.453	3.682	60.71	16.09
	L1133	DC2	9.466	2.458	3.891	13.41	1.81	9.633	2.496	3.904	16.65	2.84	9.381	2.464	3.826	22.27	3.81	9.759	2.417	4.067	83.68	34.68
	L1134	DC2	9.4	2.454	3.858	7.02	1.16	9.534	2.475	3.877	38.08	9.43	9.193	2.408	3.826	18.83	3.32	9.696	2.47	3.946	91.72	40.62
	L1135	DC2	9.313	2.591	3.621	23.07	3.71	9.773	2.561	3.845	76.96	22.92	8.927	2.448	3.67	89.45	42.98	9.522	2.444	3.927	91.14	38.17
	L1136	DC2	9.243	2.747	3.399	36.68	9.57	10.103	2.906	3.495	99.06	62.13	10.18	2.849	3.584	66.74	25.56	10.329	2.802	3.706	84.52	43.76
	L1137	DC2	8.25	2.899	2.854	56.94	8.73	8.206	2.941	2.805	95.43	35.2	8.434	2.947	2.866	71.83	19.27	8.718	2.916	3	94.86	40.84
	L1138	DC2	8.97	2.398	3.773	0.87	0.06	9.949	2.462	4.075	23.5	7.29	NA	NA	NA	NA	NA	9.961	2.443	4.11	74.1	27.12
	L1139	DC2	9.381	2.439	3.875	9.05	1.57	9.377	2.575	3.656	27.58	5.68	9.423	2.486	3.812	26.73	5.3	9.67	2.524	3.861	79.21	30.17
	L1140	DC2	9.424	2.489	3.823	3.97	0.56	9.905	2.473	4.035	91.54	53.23	9.446	2.439	3.889	27.95	5.52	9.502	2.452	3.902	78.76	30.1
	L1141	DC2	9.435	2.469	3.841	15.02	2.83	9.426	2.53	3.762	34.7	7.19	9.439	2.501	3.784	49.65	15.03	9.994	2.499	4.021	89.72	43.03
	L1142	DC2	8.55	2.344	3.678	30.53	9.87	8.674	2.337	3.751	29.83	10.35	8.298	2.323	3.596	85.23	39.79	9.13	2.376	3.864	91.64	49.25
	L1143	DC2	9.341	2.448	3.844	7.08	0.94	9.87	2.429	4.087	21.3	5.33	9.476	2.353	4.05	42.87	9.69	9.867	2.427	4.093	74.82	22.02
	L1144	DC2	9.275	2.615	3.562	4.34	0.41	9.495	2.563	3.738	6.61	0.9	9.367	2.525	3.719	19.47	2.53	9.498	2.577	3.706	46.92	13
	L1145	DC2	9.271	2.534	3.697	21.33	3.57	9.472	2.49	3.832	29.93	5.16	9.164	2.445	3.771	46.5	9.76	9.611	2.441	3.964	66.15	20.19
	L1146	DC2	9.231	2.433	3.824	1.02	0.15	9.598	2.534	3.816	16.54	4.08	8.109	2.042	3.997	6.54	1.02	9.711	2.442	4.009	39.92	9.02
	L1147	DC2	9.799	2.524	3.913	14.1	2.13	9.839	2.513	3.941	21.31	5.03	9.732	2.48	3.951	66.4	19.22	10.054	2.508	4.047	75.65	27.64
	L1148	DC2	9.292	2.446	3.823	17.04	3.46	9.485	2.602	3.671	15.5	3.31	9.368	2.459	3.82	66.68	24.95	9.521	2.531	3.791	90.44	45.92
	L1149	DC2	9.746	2.521	3.904	6.41	0.62	9.827	2.516	3.941	17.64	4.96	9.266	2.405	3.874	22.52	4.63	9.119	2.533	3.626	59.28	22.51
	L1151	DC2	7.889	2.487	3.184	8.42	1.74	8.162	2.603	3.15	13.47	3.55	8.06	2.476	3.264	35.03	7.03	8.161	2.546	3.226	46.85	14.47
	L1152	DC2	9.437	2.525	3.759	5.55	1.01	9.325	2.542	3.701	41.11	12.18	9.327	2.519	3.72	28.28	5.36	9.18	2.584	3.579	74.02	29.41
	L1153	DC2	10.148	2.627	3.889	20.28	3.51	10.392	2.651	3.966	43.87	7.78	10.259	2.602	3.964	93.47	50.05	10.236	2.628	3.923	85.85	34.73
	L1155	DC2	9.569	2.399	4.022	12.55	1.93	9.367	2.471	3.815	12.19	3.22	9.036	2.413	3.764	33.24	6.36	9.334	2.412	3.898	69.72	27.98
	L1156	DC2	9.079	2.482	3.676	6.44	1.54	9.031	2.371	3.833	6.18	1.4	9.031	2.289	3.97	49.97	13.19	9.286	2.414	3.878	94.47	42.6
	L1157	DC2	10.326	2.617	3.975	65.4	13.73	10.21	2.674	3.851	99.48	50.69	10.295	2.59	4	86.97	33.59	10.325	2.647	3.93	96.88	35.3
	L1158	DC2	9.64	2.414	4.017	6.6	1.01	9.667	2.552	3.818	56.78	16.19	9.466	2.397	3.972	43.88	10.2	9.312	2.486	3.784	82.08	36.82
	L1159	DC2	8.597	2.457	3.52	13.84	2.85	8.744	2.508	3.503	12.17	2.71	7.518	2.103	3.595	25.09	4.55	8.97	2.446	3.685	76.77	30
	L1160	DC2	9.378	2.507	3.768	0.46	0.05	9.452	2.509	3.81	NA	0.28	8.403	2.141	3.944	7.65	0.99	9.628	2.4	4.042	62.05	19.58
	L1161	DC2	9.416	2.396	3.959	2.86	0.7	9.832	2.541	3.897	21.61	5.83	9.409	2.398	3.943	22.12	8.01	9.772	2.537	3.903	63.32	28.2
	L1162	DC2	9.337	2.416	3.892	5.07	0.77	9.561	2.389	4.029	18.14	4.54	9.144	2.357	3.905	75.55	28.2	9.545	2.399	4.011	95.74	49.18
	L1163	DC2	9.345	2.571	3.667	7.93	1.3	9.703	2.697	3.643	20.19	3.99	9.567	2.63	3.662	32.95	10.08	9.567	2.746	3.52	73.66	33.17
	L1164	DC2	8.541	2.213	3.899	8.46	1.79	8.436	2.173	3.923	19.52	6.06	8.412	2.131	3.973	62.57	18.68	8.591	2.255	3.845	NA	NA
	L1165	DC2	8.587	2.346	3.686	5.71	0.86	8.69	2.368	3.696	8.68	2.58	8.489	2.332	3.655	23	5.22	8.854	2.434	3.678	65.36	25.71
	L1166	DC2	9.315	2.642	3.548	95.59	26.7	9.435	2.649	3.58	93.32	36.1	9.543	2.634	3.639	95.17	39.91	9.567	2.501	3.862	100	48.54
	L1167	DC2	8.888	2.411	3.709	5.43	1.12	8.982	2.564	3.523	13.86	3.43	7.72	2.162	3.58	8.33	2.41	9.15	2.519	3.651	68.08	23.91
	L1168	DC2	9.497	2.494	3.831	1.81	0.32	8.968	2.546	3.542	38.02	9.35	9.03	2.518	3.602	28.24	4.76	9.076	2.609	3.512	91.3	40.59
	L1169	DC2	9.049	3.057	2.973	4.53	1.2	9.757	2.523	3.888	9.66	1.58	9.569	2.522	3.814	13.91	2.3	9.695	2.514	3.883	73.45	20.28
	L1170	DC2	9.658	2.505	3.891	17.32	4.47	10.093	2.575	3.949	28.82	8.99	9.679	2.648	3.693	23.63	5.75	10.118	2.523	4.036	34.34	11.19
	L1171	DC2	8.911	3.047	2.933	10.16	4.14	8.46	2.96	2.874	97.63	26.5	8.149	2.923	2.794	NA	NA	8.47	3.009	2.825	100	52.18
	L1172	DC2	9.413	2.611	3.637	15.92	1.75	10.919	2.586	4.252	92.74	46.32	10.481	2.548	4.145	66.66	25.14	10.979	2.602	4.254	90.13	45.08
	L1173	DC2	10.407	2.563	4.097	24.92	5.92	9.716	2.503	3.923	13.66	2.12	9.689	2.586	3.77	52.25	11.16	9.659	2.55	3.814	62.04	15.72
	L1174	DC2	9.308	2.356	3.976	8.88	1.75	9.516	2.515	3.811	23.82	7.69	9.232	2.384	3.894	52.27	16.89	9.324	2.387	3.933	83.57	35.05
	L1175	DC2	8.703	2.777	3.147	1.17	0.14	NA	NA	NA	NA	NA	8.543	2.766	3.106	21.42	3.52	8.719	2.749	3.187	80.15	23.81
	L1176	DC2	7.484	2.735	2.748	24.28	5.73	7.797	2.791	2.807	73.59	23.18	7.659	2.786	2.757	86.38	39.11	7.927	2.826	2.817	77.75	33.46
	L1177	DC2	9.327	2.334	4.03	9.79	1.58	9.323	2.383	3.944	24.57	5.44	9.448	2.324	4.09	28.53	4.22	9.352	2.42	3.906	91.62	34.96
	L1178	DC2	10.231	2.56	4.02	7.62	1.21	10.245	2.656	3.902	14.08	4.36	10.39	2.542	4.108	18.69	3.09	10.394	2.6	4.027	75.05	37.83
	L1179	DC2	8.579	2.487	3.471	6.14	0.88	8.717	2.543	3.449	9.18	2.14	8.557	2.501	3.438	26.73	5.89	8.837	2.637	3.372	60.79	22.58
	L1180	DC2	9.763	2.466	3.982	4.95	0.76	9.742	2.568	3.829	7.73	1.72	9.525	2.562	3.739	NA	NA	10.311	2.559	4.053	57.31	18.18
	L1181	DC2	9.509	2.701	3.538	0.54	0.2	9.531	2.674	3.585	35.08	7.99	9.211	2.74	3.386	7.64	1.35	9.49	2.723	3.499	34.22	10.12
	L1182	DC2	8.674	3.231	2.697	10.21	1.62	8.86	3.217	2.773	72.5	17.23	8.751	3.301	2.664	95.46	44	9.046	3.258	2.789	95.5	28.97
	L1183	DC2	9.348	2.428	3.875	9.12	1.4	9.191	2.31	4.01	19.25	3.34	8.808	2.206	4.017	46.19	9.49	9.422	2.306	4.107	92.71	48.47
	L1184	DC2	9.921	2.513	3.968	8.1	1.84	9.852	2.525	3.93	36.27	10.86	9.59	2.467	3.908	32.48	7.95	10.016	2.53	3.988	78.53	36.07
	L1185	DC2	9.674	2.431	4.006	22.18	5.95	9.897	2.456	4.063	38	7.63	9.877	2.398	4.158	52.04	11.72	10.05	2.373	4.267	95.09	37.72
	L1187	DC2	8.976	2.355	3.837	17.05	3.2	9.045	2.452	3.708	31.97	8.12	8.948	2.457	3.655	79.93	34.9	9.501	2.416	3.959	68.43	34.71
	L1189	DC2	8.904	2.695	3.335	52.14	13.13	9.262	2.678	3.476	98.14	41.31	8.884	2.701	3.299	99.31	60.53	9.364	2.779	3.383	100	55.59
	L1190	DC2	9.286	2.425	3.856	5.22	0.92	9.668	2.428	4.019	27.3	8.97	9.243	2.38	3.908	48.29	10.79	9.377	2.339	4.041	64.06	18.48
	L1191	DC2	9.207	2.875	3.233	30.31	5.8	9.332	2.902	3.235	78.83	31.3	9.555	2.903	3.302	62.35	15.09	9.726	2.93	3.337	98.88	53.65
	L1192	DC2	9.742	2.53	3.903	33.71	8.15	10.164	2.531	4.047	67.51	20.02	10.018	2.551	3.946	44.33	12.66	10.176	2.556	4.013	89.4	39.24
	L1193	DC2	10.212	2.608	3.944	3.73	0.44	10.376	2.605	4.01	16.97	3.31	9.635	2.612	3.705	36.2	11.62	10.031	2.613	3.866	81.51	34.85
	L1194	DC2	9.918	2.441	4.094	8.22	1.2	9.723	2.548	3.846	32.87	12.49	8.032	2.131	3.79	14.32	4.14	9.39	2.504	3.787	NA	NA
	L1195	DC2	9.532	2.614	3.669	23.98	3.8	9.678	2.54	3.837	10.99	1.94	9.72	2.543	3.842	44.77	12.46	9.624	2.549	3.804	90.58	40.79
	L1196	DC2	8.47	2.384	3.582	20.74	5.24	8.681	2.387	3.653	38.36	10.89	8.617	2.377	3.646	83.67	31.95	9.002	2.388	3.789	93.78	45.43
	L1197	DC2	9.135	2.454	3.748	5.18	0.92	9.178	2.503	3.691	34.98	10.92	8.077	2.191	3.703	42.86	11.41	9.261	2.499	3.726	84.87	36.35
	L1198	DC2	9.3	2.301	4.101	36.75	8.19	9.204	2.345	3.961	22.66	4.52	9.298	2.288	4.089	67.99	21.44	9.456	2.466	3.876	92.52	50.54
	L1199	DC2	9.509	2.601	3.696	57.79	16.2	NA	NA	NA	NA	NA	8.721	2.297	3.818	10.66	2.96	9.076	2.239	4.089	31.88	9.34
	L1200	DC2	8.515	2.5	3.426	4.72	0.73	8.663	2.722	3.199	18.57	4.07	8.858	2.68	3.318	27.48	6.61	8.881	2.645	3.378	36.96	9.83
	L1201	DC2	9.007	2.515	3.607	5.37	0.87	9.393	2.644	3.569	58.65	16.07	9	2.552	3.541	27.32	8.07	9.444	2.601	3.657	78.04	32.03
	L1202	DC2	9.627	2.634	3.676	7.47	1.16	9.757	2.648	3.714	70.56	25.54	9.808	2.628	3.75	45.94	10.95	9.81	2.688	3.68	82.34	39.45
	L1203	DC2	NA	NA	NA	NA	NA	9.344	2.555	3.685	28.94	8.27	9.089	2.48	3.681	79.77	31.82	9.441	2.542	3.737	80.43	41.34
	L1204	DC2	10	2.449	4.118	1.46	0.17	9.952	2.481	4.04	7.22	1.28	10.25	2.454	4.193	22.35	3.63	10.137	2.441	4.175	65.37	25.64
	L1205	DC2	10.21	2.458	4.221	3.7	0.46	10.528	2.465	4.304	6.63	1.18	10.519	2.44	4.345	49.81	19.59	10.282	2.428	4.271	62.34	27.49
	L1206	DC2	9.347	2.395	3.929	23.01	4	9.605	2.433	3.983	11.21	2.94	9.463	2.416	3.941	37.68	12.14	9.31	2.377	3.953	79.11	39.03
	L1207	DC2	9.341	2.354	3.995	16.88	3.21	9.534	2.435	3.947	8.52	2.18	9.207	2.373	3.901	64.04	23.21	9.447	2.387	3.984	74.18	33.13
	L1208	DC2	9.408	2.465	3.844	7.71	2.23	9.75	2.567	3.818	14.77	5.02	9.506	2.608	3.666	27.56	7.95	9.647	2.669	3.637	NA	NA
	L1209	DC2	9.481	2.677	3.563	11.48	1.45	9.595	2.715	3.555	51.28	13.95	9.374	2.62	3.591	43.62	12.8	9.534	2.595	3.692	91.86	45.74
	L1210	DC2	9.836	2.456	4.037	8.87	1.82	9.763	2.427	4.06	34.84	10.31	9.273	2.454	3.807	48.02	20.66	9.759	2.396	4.111	66.55	25.87
	L1211	DC2	9.552	2.378	4.051	10.17	1.73	9.696	2.419	4.038	10.25	2.82	9.551	2.474	3.895	89.02	43.9	9.789	2.366	4.177	78.18	35.47
	L1212	DC2	9.619	2.45	3.957	38.99	10.21	9.976	2.494	4.03	45.91	17.48	9.743	2.48	3.97	80.85	38.94	9.923	2.486	4.018	81.23	41.13
	L1213	DC2	9.177	2.322	3.986	12.82	2.9	9.798	2.621	3.769	50.36	14.31	9.885	2.556	3.892	54.23	15.73	10.086	2.591	3.924	81.55	32.77
	L1214	DC2	9.58	2.429	3.979	12.54	2.43	10.134	2.553	4.003	18.59	5.23	10.031	2.483	4.063	50.36	20.09	9.966	2.435	4.131	85.4	45.59
	L1215	DC2	9.809	2.784	3.54	30.48	7.49	10.019	2.896	3.479	100	65.83	9.893	2.828	3.51	61.3	20.56	9.813	2.79	3.537	95.71	50.49
	L1216	DC2	9.354	2.306	4.084	11.28	2.29	9.425	2.305	4.121	10.73	2.75	9.392	2.289	4.127	52.1	14.62	9.664	2.428	4.015	91.94	43.52
	L1217	DC2	9.789	2.468	3.994	12.72	3.59	9.993	2.697	3.729	39.72	11.77	9.653	2.562	3.785	27.61	9.56	9.542	2.486	3.866	80.38	35.46
	L1219	DC2	9.268	2.337	3.999	1.46	0.24	9.508	2.379	4.024	6.83	1.28	9.525	2.281	4.193	13.03	3.6	9.601	2.289	4.223	71.84	27.22
	L1220	DC2	9.9	2.492	4.016	3.94	0.47	10.283	2.608	3.972	32.24	7.35	9.95	2.547	3.927	24.23	7.64	9.591	2.609	3.715	64.55	24.2
	L1222	DC2	10.51	2.449	4.342	8.78	1.2	10.776	2.59	4.204	62.29	21.12	10.813	2.5	4.351	56.81	19.59	10.486	2.5	4.23	87.18	43.93
	L1223	DC2	9.415	2.365	4.008	17.57	3.57	9.482	2.36	4.048	33.45	10.97	9.041	2.298	3.955	83.62	32.86	9.626	2.279	4.259	79.77	37.43
	L1224	DC2	9.109	2.485	3.689	1.82	0.12	9.321	2.533	3.709	63.43	12.71	9.116	2.448	3.742	NA	NA	9.164	2.39	3.866	94.95	44.37
	L1225	DC2	10.033	2.522	4.006	2.27	0.28	10.143	2.512	4.063	29.67	6.41	9.943	2.523	3.96	49.85	11.72	9.808	2.442	4.043	84.93	30.3
	L1226	DC2	10.489	2.525	4.196	31.6	5.15	10.121	2.576	3.966	56.13	15.43	9.442	2.234	4.271	42.82	11.27	8.361	2.309	3.641	47.78	16.87
	L1227	DC2	NA	NA	NA	NA	NA	9.254	2.471	3.783	43.98	17.58	9.322	2.409	3.891	41.72	10.7	9.56	2.355	4.099	NA	NA
	L1228	DC2	9.188	2.367	3.911	9.32	1.56	9.417	2.401	3.948	4.77	1.28	9.257	2.317	4.025	NA	NA	9.353	2.516	3.75	87.02	48.18
	L1229	DC2	8.353	3.169	2.655	NA	NA	8.719	3.285	2.668	99.58	60.12	8.507	3.173	2.689	NA	NA	8.544	3.131	2.742	100	71.82
	L1230	DC2	8.838	2.342	3.8	1.91	0.42	9.278	2.47	3.782	20.97	7.76	8.975	2.374	3.801	32.3	8.51	9.005	2.33	3.895	67.19	35.72
	L1231	DC2	9.598	2.614	3.702	6.41	1.32	9.678	2.714	3.588	14.73	2.98	9.597	2.676	3.604	12.74	2.61	9.223	2.639	3.529	57.61	15.88
	L1232	DC2	9.733	2.495	3.928	66.4	17.81	10.026	2.56	3.942	62.74	19.91	8.635	2.148	4.041	45.87	9.78	10.172	2.51	4.082	95.98	45.01
	L1233	DC2	9.146	2.296	4.018	9	1.54	9.3	2.399	3.915	8.51	2.24	9.134	2.306	3.979	39.67	10.64	9.316	2.325	4.047	31.45	9.99
	L1234	DC2	9.431	2.386	3.988	22.93	5.75	9.792	2.544	3.882	53.77	17.55	9.333	2.423	3.871	55.4	19.03	9.631	2.421	4.008	84.46	36.85
	L1235	DC2	9.049	2.369	3.847	9.06	1.57	9.342	2.377	3.956	12.17	2.7	9.079	2.425	3.781	44.56	15.09	9.522	2.326	4.129	43.43	17.75
	L1236	DC2	8.471	2.278	3.757	17.5	4.04	9.115	2.65	3.461	9.06	1.56	NA	NA	NA	NA	NA	8.892	2.575	3.487	82.29	26.15
	L1237	DC2	8.818	2.175	4.086	39.9	8.75	8.897	2.325	3.865	17.39	5.31	8.283	2.136	3.903	85.98	43.94	8.704	2.213	3.967	84.04	40.47
	L1238	DC2	8.796	2.179	4.063	35.45	8.19	9.205	2.283	4.064	18.8	4.88	8.582	2.113	4.079	NA	NA	9.218	2.275	4.081	91.91	52.3
	L1239	DC2	9.384	2.468	3.823	21.12	4.73	9.779	2.496	3.948	14.16	3.31	9.646	2.497	3.884	46.62	16.03	9.584	2.459	3.931	56.41	21.91
	L1240	DC2	9.562	2.408	3.994	8.45	0.84	9.686	2.458	3.977	16.72	3.22	9.278	2.391	3.898	67.51	22.46	9.557	2.403	4.015	47.61	14.68
	L1241	DC2	9.786	2.364	4.171	25.67	8.2	9.85	2.414	4.112	10.88	2.97	9.753	2.437	4.023	49.43	14.2	9.694	2.431	4.022	41.68	12.43
	L1242	DC2	9.372	2.325	4.057	7.86	1.35	9.722	2.419	4.046	59.05	22.29	9.514	2.399	3.988	16.74	4.3	9.553	2.376	4.057	64.01	25.33
	L1243	DC2	8.969	2.433	3.715	2.66	0.4	9.075	2.575	3.548	16.13	3.51	9.05	2.481	3.66	45.71	11.33	9.155	2.554	3.612	86.66	36.98
	L1244	DC2	10.044	2.638	3.833	15.41	4.03	10.29	2.656	3.901	41.27	16.33	10.077	2.644	3.829	73.94	30	10.08	2.604	3.9	80.75	33.46
	L1245	DC2	9.698	2.352	4.152	2.81	0.61	9.802	2.37	4.175	9.93	2.93	9.689	2.299	4.234	54.08	16	9.864	2.32	4.28	89.35	43.71
	L1246	DC2	8.84	2.208	4.033	16.72	2.62	9.242	2.348	3.967	23.54	6.14	7.727	1.998	3.889	NA	NA	9.478	2.299	4.152	74.11	25.39
	L1247	DC2	9.708	2.168	4.519	12.21	1.96	10.101	2.344	4.351	7.6	1.23	9.97	2.253	4.443	56.33	17.12	10.311	2.382	4.373	74.11	30.99
	L1248	DC2	8.742	2.436	3.615	8.06	1.42	8.831	2.431	3.659	11.14	2.32	8.768	2.379	3.704	NA	NA	9.301	2.569	3.641	87.07	35.56
	L1249	DC2	9.783	2.611	3.773	25.33	2.85	9.684	2.733	3.572	78.93	22.07	9.648	2.676	3.62	71.94	16.93	9.423	2.659	3.571	89.84	36.97
	L1250	DC2	9.367	2.354	4.009	8.36	1.44	9.74	2.475	3.967	27.42	6.04	9.583	2.383	4.041	56.01	17.11	9.811	2.401	4.118	78.38	34.82
	L1251	DC2	8.579	2.447	3.528	11.24	2.31	NA	NA	NA	NA	NA	8.223	2.359	3.503	54.44	22.64	10.273	2.608	3.969	74.08	28.13
	L1252	DC2	9.186	2.337	3.961	7.38	0.97	9.388	2.389	3.953	10.51	1.83	8.863	2.276	3.919	42.25	13.2	9.392	2.326	4.081	81.39	31.86
	L1253	DC2	8.544	2.389	3.594	9.87	2.24	8.768	2.463	3.59	20.71	6.4	8.558	2.228	3.863	NA	NA	9.3	2.298	4.068	86.54	49.31
	L1254	DC2	9.696	2.481	3.94	12.62	1.97	10.21	2.522	4.077	26.94	7.67	10.023	2.518	3.996	84.05	31.57	10.152	2.417	4.251	91.69	40.64
	L1255	DC2	9.205	2.544	3.639	0.45	0.11	9.153	2.578	3.576	3.81	0.86	9.231	2.568	3.617	8.06	1.79	9.255	2.485	3.751	35.2	9.69
	L1256	DC2	10.043	2.649	3.829	58.93	15.19	10.244	2.616	3.955	93.04	31.81	10.099	2.623	3.879	60.6	12.53	10.068	2.628	3.859	88.27	27.11
	L1257	DC2	8.195	2.9	2.841	78.26	21.07	10.332	2.539	4.102	67.43	19.23	10.092	2.431	4.177	57.26	17.98	10.189	2.537	4.054	89.04	29.32
	L1258	DC2	9.165	2.325	3.966	1.41	0.17	9.283	2.451	3.818	28.26	6.52	9.405	2.477	3.816	27.99	7.2	9.268	2.483	3.76	60.53	18.36
	L1259	DC2	8.539	2.496	3.438	1.23	0.24	8.752	2.596	3.392	11.73	2.87	8.594	2.487	3.469	62.56	19.49	8.607	2.402	3.609	61.18	21.41
	L1260	DC2	8.345	2.398	3.508	13.8	2.46	NA	NA	NA	NA	NA	8.243	2.302	3.601	81.73	31.47	8.56	2.272	3.795	85.52	39.51
	L1261	DC2	9.507	2.184	4.385	6.47	0.83	NA	NA	NA	NA	NA	10.247	2.186	4.716	43.85	15.15	9.934	2.179	4.6	75.18	34.71
	L1262	DC2	9.363	2.435	3.889	1.64	0.33	9.619	2.517	3.851	36.13	9.84	9.542	2.487	3.856	46.22	13.45	9.64	2.477	3.917	73.46	29.8
	L1263	DC2	9.912	2.518	3.962	2.08	0.35	10.026	2.603	3.884	12.07	3.08	9.559	2.458	3.906	91.39	38.8	9.778	2.382	4.133	88.2	42.1
	L1264	DC2	9.061	2.45	3.724	4.72	1.06	9.353	2.512	3.748	8.63	1.67	8.792	2.417	3.648	55.38	23.51	9.223	2.456	3.776	83.41	41.64
	L1265	DC2	8.239	2.404	3.449	4.03	0.77	8.688	2.505	3.495	21.65	5.31	8.478	2.466	3.45	74.05	29.4	8.542	2.429	3.54	82.82	35.76
	L1266	DC2	9.62	2.399	4.045	16.2	4.8	9.793	2.532	3.905	25.14	10.77	9.662	2.405	4.053	26.31	7.88	9.769	2.415	4.081	41.3	17.63
	L1267	DC2	NA	NA	NA	NA	NA	9.39	2.741	3.45	NA	NA	9.059	2.679	3.396	NA	NA	9.035	2.581	3.522	93.99	32.64
	L1268	DC2	9.52	2.386	4.022	23.1	3.35	9.762	2.446	4.022	40.02	8.69	9.286	2.479	3.762	50.41	15.76	9.511	2.406	3.984	67.41	24.32
	L1269	DC2	8.328	2.425	3.452	8.06	1.25	8.658	2.448	3.566	20.35	4.1	8.366	2.424	3.462	79.89	30.5	8.601	2.412	3.585	95.73	47.37
	L1271	DC2	9.003	2.382	3.808	2.87	0.33	9.202	2.425	3.831	30.5	6.65	9.131	2.415	3.792	29.38	7.39	9.085	2.383	3.834	79.15	27.86
	L1272	DC2	9.996	2.6	3.877	45.67	11.41	10.147	2.657	3.835	94.11	52.36	9.758	2.526	3.874	61.74	15.88	10.374	2.577	4.046	94.75	49.95
	L1273	DC2	9.709	2.342	4.187	16.16	1.84	9.887	2.415	4.138	17.12	3.32	9.725	2.349	4.163	72.77	22.62	9.694	2.349	4.165	89.34	43.01
	L1274	DC2	9.967	2.469	4.067	4.05	0.7	9.846	2.615	3.794	NA	NA	9.36	2.589	3.633	68.22	33.96	9.545	2.562	3.75	91.54	62.73
	L1275	DC2	9.123	2.334	3.938	6.42	0.98	9.585	2.421	4.002	7.48	1.67	9.417	2.37	3.997	38.96	13.81	9.046	2.317	3.935	87.47	43.22
	L1276	DC2	9.124	2.446	3.755	NA	0.02	9.237	2.419	3.861	5.78	0.99	8.928	2.445	3.66	12.72	3.41	9.007	2.317	3.914	64.53	30.08
	L1277	DC2	8.98	2.403	3.762	15.72	3.87	9.269	2.473	3.789	11.42	3.06	9.12	2.45	3.747	70.9	24.56	9.53	2.429	3.955	72.26	30.28
	L1278	DC2	9.119	2.522	3.644	2.32	0.21	9.358	2.671	3.531	17.78	5.63	8.99	2.567	3.523	48.32	13.18	9.249	2.634	3.531	61.15	21.71
	L1279	DC2	9.349	2.48	3.808	5.83	1.08	9.532	2.564	3.761	11.22	2.22	9.431	2.493	3.807	63.59	18.64	9.554	2.563	3.769	76.63	27.38
	L1280	DC2	8.877	2.362	3.784	14.69	4.55	9.261	2.426	3.845	22.18	5.95	8.83	2.4	3.698	58.1	24.14	9.556	2.583	3.725	63.88	24.98
	L1281	DC2	NA	NA	NA	NA	NA	8.656	2.232	3.931	23.38	7.41	8.483	2.201	3.89	70.99	30.66	8.592	2.141	4.049	74.24	30.65
	L1283	DC2	8.134	2.941	2.779	38.8	10.39	8.631	2.839	3.111	79.52	32.14	8.353	3.012	2.78	100	58.25	8.392	3	2.805	99.1	55.1
	L1284	DC2	8.914	2.298	3.905	6.7	0.81	9.076	2.408	3.8	15.41	3.95	8.646	2.331	3.729	21.33	6.33	9.097	2.365	3.875	58.08	22.63
	L1285	DC2	NA	NA	NA	NA	NA	9.039	2.509	3.619	17.07	4.48	9.255	2.606	3.57	82.15	35.98	9.61	2.663	3.64	60.74	26.36
	L1286	DC2	9.61	2.423	3.993	9.61	1.31	9.982	2.429	4.139	13.46	4.11	8.418	2.075	4.076	65.51	23.84	9.748	2.371	4.136	93.56	49.01
	L1287	DC2	9.595	2.406	4.019	27.22	5.04	9.822	2.516	3.939	21.34	4.67	9.701	2.457	3.966	42.88	10.87	9.894	2.438	4.091	93.88	44.68
	L1288	DC2	9.047	2.441	3.733	8.09	1.22	9.29	2.504	3.74	14.09	3.47	9.147	2.46	3.736	32.72	7.99	9.348	2.335	4.036	79.23	32
	L1289	DC2	9.446	2.374	4.032	9.29	1.41	9.891	2.379	4.203	24.68	5.93	9.653	2.345	4.138	73.82	26.01	9.789	2.375	4.16	88.53	43.01
	L1290	DC2	8.526	2.241	3.844	37.74	8.64	8.622	2.209	3.948	11.22	2.72	8.692	2.197	3.984	64.73	26.96	10.261	2.543	4.068	NA	NA
	L1291	DC2	9.729	2.49	3.942	8.42	1.75	10.016	2.561	3.945	29.4	9.34	9.865	2.466	4.021	24.1	9.7	10.177	2.48	4.139	72.02	25.7
	L1292	DC2	10.324	2.392	4.343	5.27	1.2	10.638	2.577	4.162	10.82	2.42	10.453	2.481	4.235	39.17	20.53	9.54	2.36	4.075	67.4	33.29
	L1293	DC2	10.116	2.723	3.726	90.27	19.32	10.174	2.746	3.737	60.82	13.58	10.198	2.665	3.844	33.01	6.82	10.109	2.616	3.892	86.01	27.31
	L1294	DC2	9.389	2.393	3.966	35.15	10.31	NA	NA	NA	NA	NA	9.124	2.3	3.98	86.82	35.05	9.77	2.541	3.884	80.82	37.83
	L1295	DC2	9.163	2.303	4.003	3.57	0.47	9.376	2.463	3.843	20.21	5.46	9.281	2.401	3.887	34.76	11.46	9.378	2.453	3.851	62.15	22.45
	L1296	DC2	9.41	2.323	4.094	10.13	2.24	9.548	2.339	4.113	26.39	7.9	9.131	2.355	3.92	65.35	25.65	9.773	2.329	4.228	82.08	35.69
	L1297	DC2	10.451	2.563	4.108	43.18	10.11	10.62	2.549	4.196	71.95	17.11	10.31	2.614	3.962	81.14	29.7	10.19	2.448	4.205	94.99	32.27
	L1298	DC2	8.571	2.353	3.67	19.94	5.21	8.938	2.436	3.7	29.66	8.86	8.491	2.348	3.636	57.93	19.73	8.878	2.422	3.687	86.05	42.56
	L1299	DC2	9.047	2.493	3.658	1.54	0.49	9.37	2.51	3.773	3.42	0.9	9.235	2.523	3.678	23.15	7.67	9.31	2.491	3.759	62.81	19.58
	L1300	DC2	9.855	2.554	3.885	4.35	0.79	NA	NA	NA	NA	NA	9.706	2.537	3.87	27.44	5.77	9.948	2.522	3.98	45.28	13.93
	L1301	DC2	9.148	2.601	3.54	NA	NA	9.45	2.694	3.527	15.48	2.45	9.252	2.631	3.524	NA	NA	9.563	2.587	3.717	37.49	10.18
	L1302	DC2	9.161	2.287	4.052	25.87	6.7	9.446	2.239	4.256	31.85	9.38	8.789	2.257	3.916	68.5	28.09	9.406	2.273	4.163	85.71	41.5
	L1304	DC2	9.079	2.298	3.99	3.46	0.37	9.188	2.376	3.901	16	2.86	9.249	2.34	3.972	36.73	11.94	9.248	2.317	4.02	92.74	46.25
	L1305	DC2	NA	NA	NA	NA	NA	10.136	2.525	4.038	26.45	8.59	8.977	2.334	3.869	85.18	39.68	9.603	2.404	4.034	75.13	37.74
	L1306	DC2	10.223	2.668	3.883	39.75	11.12	10.24	2.548	4.044	51.21	15.94	9.967	2.56	3.923	92.02	43.24	10.128	2.563	3.996	96.75	63.59
	L1307	DC2	9.546	2.415	3.986	11.21	2.51	NA	NA	NA	NA	NA	7.825	2.009	3.921	77.81	28.03	9.317	2.283	4.118	NA	NA
	L1308	DC2	10.512	2.535	4.176	7.83	1.77	10.759	2.518	4.306	18.09	4.59	10.727	2.522	4.272	53.02	17.21	10.679	2.527	4.257	NA	NA
	L1310	DC2	NA	NA	NA	NA	NA	9.881	3.015	3.301	97.78	66.86	9.768	2.723	3.613	62.05	26.44	9.627	2.728	3.614	99.19	71.35
	L1311	DC2	10.306	2.579	4.023	76.5	14.25	10.142	2.614	3.908	76.65	15.65	10.337	2.646	3.918	NA	NA	10.54	2.61	4.068	93.37	33.53
	L1312	DC2	9.81	2.499	3.953	78.06	25.08	10.01	2.564	3.926	82.11	30.78	9.378	2.587	3.647	77.93	40	9.772	2.591	3.798	88.96	50.43
	L1313	DC2	9.224	2.297	4.043	11.37	1.98	NA	NA	NA	NA	NA	9.295	2.382	3.923	76.12	30.05	9.892	2.564	3.883	50.93	16.77
	L1314	DC2	10.152	2.528	4.056	85.81	NA	10.29	2.648	3.914	85.32	28.17	10.373	2.613	3.987	55.73	13.41	10.437	2.613	4.02	85.72	40.09
	L1315	DC2	8.566	2.322	3.722	6.69	0.75	9.666	2.571	3.78	21.17	3.57	8.515	2.34	3.667	70.84	24.65	9.632	2.523	3.844	99.05	51.91
	L1316	DC2	9.973	2.547	3.959	58.03	13.28	10.214	2.5	4.121	32.4	6.8	9.99	2.461	4.08	31.27	9	10.122	2.491	4.102	85.52	30.25
	L1317	DC2	9.202	2.551	3.634	33.79	7.44	9.67	2.689	3.629	77.77	15.79	9.249	2.629	3.529	87.55	30.45	9.741	2.582	3.796	84.6	38.61
	L1318	DC2	9.864	2.47	4.021	21.86	7.45	NA	NA	NA	NA	NA	8.664	2.125	4.099	49.54	17.36	9.971	2.435	4.13	59.17	25.19
	L1319	DC2	9.058	2.325	3.93	1.17	0.14	9.31	2.328	4.041	13.66	3.11	9.146	2.314	3.98	NA	NA	9.166	2.269	4.076	56.56	20.79
	L1320	DC2	NA	NA	NA	NA	NA	9.121	3.093	2.958	86.1	36.68	8.939	2.934	3.06	13.48	3	8.97	2.917	3.088	74.23	22.95
	L1321	DC2	9.869	2.536	3.921	69.59	18.59	10.047	2.639	3.832	78.63	29.61	9.881	2.585	3.832	22.7	3.91	10.191	2.61	3.924	95.36	58.76
	L1322	DC2	9.595	2.498	3.876	72.71	20.8	9.73	2.55	3.842	96.03	32.83	9.345	2.599	3.612	79.99	27.82	9.698	2.522	3.874	100	57.61
	L1323	DC2	9.336	2.329	4.033	10.65	1.89	9.623	2.438	3.979	43.46	12.46	9.327	2.363	3.961	62.68	21.26	9.589	2.376	4.057	87.13	43.5
	L1324	DC2	8.849	2.367	3.764	11.73	3.15	9.864	2.443	4.061	22.63	7.12	9.714	2.313	4.217	32.41	8.3	9.963	2.319	4.325	43.86	14.14
	L1325	DC2	7.987	2.588	3.104	1.45	0.51	7.779	2.67	2.932	9.62	2.58	8.101	2.694	3.016	7.75	2.23	8.069	2.704	3	55.83	23.31
	L1326	DC2	9.351	2.613	3.6	84.46	21.27	9.59	2.667	3.623	69.91	14.05	9.243	2.636	3.518	88.62	35.7	9.328	2.511	3.74	98.15	52.47
	L1327	DC2	9.061	2.436	3.766	8.31	1.56	9.224	2.467	3.769	5.61	1.06	9.082	2.414	3.78	40.1	12.01	9.232	2.484	3.736	57.71	20.62
	L1328	DC2	9.681	2.439	4.007	23.14	5.32	10.033	2.445	4.167	25.76	6.03	8.917	2.151	4.176	74.86	30.53	10.508	2.422	4.39	68.17	27.83
	L1329	DC2	NA	NA	NA	NA	NA	9.677	2.45	3.997	3.66	0.49	9.55	2.429	3.967	45.3	16.02	9.77	2.407	4.091	61.82	23.66
	L1330	DC2	9.69	2.549	3.833	8.61	1.58	9.79	2.707	3.646	24.96	6.68	8.566	2.308	3.726	15.2	4.64	10.102	2.659	3.826	93.71	47.65
	L1331	DC2	9.631	2.466	3.965	28	5.79	9.806	2.544	3.877	NA	0.32	9.595	2.449	3.932	16.91	4.19	9.732	2.457	3.982	31.16	NA
	L1332	DC2	9.517	2.459	3.92	7.66	1.86	9.708	2.593	3.77	12.7	2.52	9.137	2.471	3.708	9.94	2.62	8.1	2.462	3.305	60.62	21.67
	L1333	DC2	9.249	2.383	3.903	10.13	2.35	9.535	2.43	3.953	24.06	5.08	9.294	2.469	3.784	28.69	7.89	8.983	2.46	3.677	69.69	25.63
	L1334	DC2	9.94	2.51	3.987	13.2	4.48	10.072	2.662	3.813	32.36	6.7	10.109	2.598	3.917	35.04	10.41	10.145	2.56	3.994	88.41	36.5
	L1335	DC2	9.117	2.407	3.812	0.44	0.05	9.884	2.558	3.898	32.44	6.87	10.186	2.578	3.974	21.73	5.76	10.056	2.521	4.021	83.39	33.4
	L1336	DC2	9.102	2.44	3.767	14.34	3.02	9.696	2.458	3.98	6.94	1.41	9.578	2.423	3.969	70.81	16.78	10.038	2.496	4.062	75.98	36.07
	L1337	DC2	9.674	2.393	4.059	33.51	10.33	9.765	2.513	3.911	15.86	4.56	9.74	2.48	3.951	46.78	17.28	10.023	2.513	4.021	70.51	33.03
	L1338	DC2	9.692	2.438	3.996	15.65	3	9.882	2.616	3.813	25.73	5.07	10.098	2.547	3.979	NA	NA	10.024	2.55	3.952	79.81	34.1
	L1339	DC2	9.459	2.387	3.985	27.96	7.43	9.824	2.528	3.917	43.32	11.21	9.778	2.51	3.905	42.41	16.69	9.751	2.5	3.922	90.55	39.7
	L1340	DC2	8.524	2.4	3.579	26.25	7.57	8.692	2.434	3.604	25.37	5.61	8.409	2.437	3.461	71.47	31.99	9.447	2.518	3.778	90.06	43.3
	L1341	DC2	9.992	2.563	3.933	13.02	2.56	10.074	2.598	3.92	41.23	8.38	9.967	2.626	3.818	27.79	10.4	9.909	2.586	3.87	89.46	44.89
	L1342	DC2	9.434	2.288	4.172	30.1	7.09	9.159	2.55	3.615	21.67	5.15	9.162	2.411	3.814	28.96	15.69	9.415	2.481	3.815	25.43	9.27
	L1343	DC2	9.923	2.57	3.89	62.77	13.09	9.932	2.582	3.887	72.55	18.23	9.752	2.682	3.657	37.81	9.36	9.843	2.539	3.909	92.53	46.67
	L1345	DC2	9.862	2.32	4.282	28.28	7.08	9.88	2.33	4.277	50.34	16.46	8.82	2.05	4.323	47.42	17.31	9.973	2.314	4.334	87.59	45.66
	L1346	DC2	9.012	2.429	3.732	1.03	0.1	9.374	2.531	3.723	31.3	8.87	9.113	2.485	3.679	19.08	5.06	9.213	2.458	3.777	79.02	42.58
	L1347	DC2	9.328	2.509	3.738	9.66	2.2	9.798	2.62	3.771	14.79	3.86	8.262	2.236	3.711	19.53	5.42	9.523	2.603	3.682	61.44	22.47
	L1348	DC2	9.425	2.487	3.811	72.36	22.62	9.54	2.543	3.781	68.4	26.32	9.539	2.554	3.752	65.5	26.46	9.622	2.52	3.847	94.81	56.98
	L1349	DC2	9.574	2.403	4.008	1.69	0.22	9.738	2.467	3.971	19.26	5.58	9.617	2.38	4.06	9.57	2.83	9.858	2.436	4.078	72.22	28.64
	L1350	DC2	10.041	2.775	3.638	4.13	0.84	10.207	2.827	3.633	63.46	16.02	10.182	2.833	3.613	8.68	3.33	10.128	2.843	3.596	85	40.69
	L1351	DC2	9.107	2.299	3.982	9.38	1.83	9.243	2.468	3.777	13.41	4.1	9.247	2.412	3.85	19.68	6.96	9.31	2.374	3.951	51.85	18.53
	L1352	DC2	9.466	2.307	4.138	1.19	0.21	9.71	2.386	4.121	8.78	1.8	8.309	1.96	4.267	16.23	3.82	9.417	2.269	4.189	30.65	8.49
	L1353	DC2	9.008	2.353	3.852	41.1	13.57	9.457	2.477	3.846	79.42	33.89	9.143	2.432	3.78	47.71	15.53	9.436	2.473	3.848	85.25	41.63
	L1354	DC2	9.3	2.306	4.065	7.46	1.29	9.545	2.352	4.093	75.96	29.5	9.282	2.371	3.942	90.57	45.84	9.55	2.368	4.062	72.02	30.94
	L1355	DC2	9.921	2.602	3.841	22.16	3.72	9.794	2.645	3.732	72.58	24.98	9.778	2.62	3.743	43.38	11.41	9.768	2.509	3.918	89.66	40.91
	L1356	DC2	9.5	2.472	3.872	25.48	8.02	9.779	2.513	3.925	63.46	20.55	9.586	2.495	3.86	29.59	9.84	10.027	2.577	3.919	75.83	34.75
	L1357	DC2	9.136	2.379	3.873	14.76	2.63	9.529	2.412	3.981	15	3.2	9.545	2.473	3.884	32.76	7.93	9.81	2.386	4.146	86.06	28.2
	L1358	DC2	9.211	2.353	3.946	30.81	6.51	9.265	2.415	3.862	37.15	9.44	9.225	2.396	3.884	40.42	14.7	9.133	2.403	3.837	85.24	34.38
	L1359	DC2	9.445	2.531	3.753	21.58	5.92	9.727	2.644	3.696	11.33	3.2	9.624	2.535	3.813	24.44	5.27	9.791	2.531	3.893	46.85	16.44
	L1360	DC2	NA	NA	NA	NA	NA	9.731	2.531	3.866	4.72	0.73	9.516	2.618	3.643	28.79	7.54	9.842	2.505	3.959	47.07	14.99
	L1361	DC2	9.647	2.813	3.454	41.27	10.32	10.414	2.467	4.25	18.55	3.86	10.452	2.407	4.358	34.21	9.26	10.766	2.493	4.344	52.93	17.73
	L1362	DC2	10.226	2.484	4.138	5.33	1.64	10.362	2.497	4.173	9.58	2.51	10.168	2.54	4.024	70.35	29.29	10.538	2.511	4.229	89.21	50.92
	L1363	DC2	9.98	2.325	4.321	3.59	0.48	10.034	2.336	4.333	22.11	4.59	9.756	2.296	4.288	10.89	2.86	10.055	2.296	4.418	86.09	33.09
	L1364	DC2	10.393	2.428	4.319	9.82	1.23	10.337	2.39	4.361	21.81	3.96	10.106	2.448	4.151	34.56	8.14	10.453	2.378	4.442	66.79	27.02
	L1365	DC2	9.172	2.458	3.759	16.09	4.44	9.572	2.529	3.807	10.39	3.77	9.244	2.526	3.681	54.82	17.56	9.602	2.52	3.835	39.23	19.55
	L1366	DC2	8.587	2.89	2.99	96.17	NA	8.683	2.982	2.927	99.13	49.86	8.514	2.946	2.9	NA	NA	8.752	3.062	2.872	98.89	44.96
	L1367	DC2	8.95	2.425	3.754	NA	NA	9.484	2.295	4.159	20.72	5.03	9.038	2.341	3.911	69.23	28.79	9.572	2.442	3.972	97.31	68.82
	L1368	DC2	9.608	2.353	4.108	24.4	7.35	9.735	2.63	3.732	25.39	6.13	9.601	2.478	3.899	27.7	6.47	9.982	2.581	3.896	55.47	17.84
	L1370	DC2	10.338	2.448	4.252	17.99	4.18	10.394	2.499	4.193	16.98	4.5	10.043	2.486	4.059	23.96	7.02	10.385	2.568	4.073	52.78	19.2
	L1371	DC2	9.315	2.307	4.069	4.88	0.85	9.737	2.452	4.008	13.86	3.96	9.427	2.482	3.822	33.97	9.21	9.785	2.522	3.907	72.24	31.13
	L1373	DC2	NA	NA	NA	NA	NA	10.077	2.644	3.841	83.39	28.49	9.7	2.531	3.859	20.47	4.86	9.878	2.566	3.882	68.41	24.3
	L1374	DC2	8.944	2.57	3.5	6.32	1.05	10.073	2.663	3.815	33.68	10.9	8.56	2.126	4.046	14.15	4.44	9.84	2.54	3.91	50.03	14.8
	L1375	DC2	9.209	2.552	3.628	11.24	1.56	9.435	2.516	3.785	31.35	7.4	8.084	2.2	3.7	26.19	6.25	NA	NA	NA	36.74	9.56
	L1376	DC2	9.258	2.307	4.045	24.2	6.89	9.434	2.387	3.996	56.44	24.95	9.151	2.298	4.001	57.2	22.37	9.389	2.375	3.982	78.02	34.8
	L1378	DC2	9.613	2.514	3.849	5.79	0.86	9.753	2.571	3.815	13.24	2.59	9.657	2.51	3.861	24.14	5.77	9.89	2.517	3.952	77.69	28.84
	L1379	DC2	9.091	2.406	3.808	8.28	1.43	9.522	2.519	3.815	18.52	3.84	9.112	2.415	3.79	11.78	3.02	9.255	2.405	3.873	39.6	14.99
	L1380	DC2	9.607	2.642	3.663	1.67	0.34	10.135	2.686	3.806	99.01	NA	10.308	2.624	3.954	96.78	51.98	10.935	2.684	4.104	95.13	48.4
	L1381	DC2	9.803	2.472	3.987	33.07	8.39	10.146	2.6	3.931	63.98	22.15	9.849	2.511	3.934	60.75	19.59	10.162	2.535	4.03	98.02	44.79
	L1382	DC2	9.39	2.298	4.115	15.69	4.29	8.837	2.615	3.401	18.84	4.47	8.205	2.593	3.189	11.45	3.87	9.192	2.344	3.954	48.21	15.84
	L1383	DC2	9.45	2.386	3.991	7.35	1.12	9.344	2.462	3.837	8.26	1.79	8.412	2.116	3.998	15.79	2.24	9.47	2.395	3.985	60.64	20.19
	L1384	DC2	NA	NA	NA	NA	NA	9.67	2.608	3.738	38.22	7.8	9.687	2.455	3.963	67.97	27.65	9.545	2.526	3.804	59.12	20.14
	L1385	DC2	9.466	2.419	3.946	0.44	0.04	9.912	2.459	4.071	60.99	19.03	9.302	2.418	3.867	56.44	19.24	NA	NA	NA	90.79	35.34
	L1386	DC2	9.986	2.445	4.119	11.1	2.24	10.349	2.459	4.24	27.05	6.97	10.214	2.465	4.174	26.28	10.2	10.228	2.437	4.231	60.02	24.52
	L1387	DC2	9.939	2.439	4.118	84	NA	10.166	2.544	4.035	86.01	30.86	9.992	2.496	4.034	54.72	17.71	9.883	2.55	3.914	72.37	25.98
	L1388	DC2	9.967	2.566	3.909	13.77	2.57	9.581	2.485	3.886	27.95	11	9.641	2.372	4.081	31.95	9.82	9.846	2.342	4.236	54.98	25.57
	L1389	DC2	8.886	2.475	3.611	31.76	6.99	9.264	2.61	3.572	46.16	14.78	9.243	2.546	3.649	49.14	15.87	9.537	2.6	3.693	38.88	12.72
	L1390	DC2	10.236	2.629	3.92	99.12	NA	10.078	2.45	4.17	33.15	13.7	10.358	2.6	4.02	95.95	47.45	10.636	2.643	4.058	99.01	50.31
	L1391	DC2	9.603	2.551	3.791	6.81	1.31	9.747	2.681	3.656	20.79	4.95	9.586	2.608	3.694	49.69	16.57	9.404	2.483	3.818	44.8	16.43
	L1392	DC2	9.722	2.553	3.832	30.71	10.72	9.955	2.507	4	25.2	10.46	9.14	2.601	3.525	75.8	34.38	10.142	2.507	4.075	73.67	28.58
	L1393	DC2	9.015	2.482	3.666	7.54	1.69	10.836	2.569	4.241	41.15	10.31	10.64	2.453	4.362	34.12	10.6	10.993	2.505	4.42	76.94	26.25
	L1394	DC2	9.777	2.415	4.087	28.48	6.16	9.405	2.543	3.736	13.67	3.14	9.183	2.487	3.715	25.57	5.38	9.776	2.537	3.895	NA	7.06
	L1395	DC2	9.962	2.316	4.38	24.26	3.13	10.339	2.426	4.307	81.69	26.13	9.847	2.195	4.508	28.69	5.88	10.038	2.264	4.478	87.44	34.53
	L1397	DC2	10.046	2.372	4.264	7.06	1.14	10.266	2.425	4.269	71.68	27.59	9.861	2.365	4.193	19.73	5.85	10.028	2.364	4.276	84.46	42.54
	L1398	DC2	9.564	2.295	4.193	24.26	7.21	9.7	2.364	4.137	31.03	11.38	8.976	2.289	3.948	75.13	29.6	9.778	2.49	3.955	68.11	28.78
	L1399	DC2	10.045	2.487	4.078	13.88	3.22	10.245	2.576	4.008	25.85	6.02	8.831	2.165	4.097	16.4	5.61	9.736	2.463	3.976	77.52	31.64
	L1400	DC2	NA	NA	NA	NA	NA	10.725	2.653	4.078	88.66	31.61	10.623	2.575	4.154	34.73	10.71	10.644	2.606	4.123	97.9	44.63
	L1401	DC2	10.002	2.36	4.265	4.62	0.85	9.954	2.431	4.143	18.67	5.63	9.929	2.36	4.222	22.95	6.35	10.103	2.358	4.313	75.73	25.2
	L1402	DC2	9.857	2.501	3.971	63.05	14.03	8.874	2.316	3.865	38.23	11.39	8.737	2.267	3.874	26.36	9.92	9.1	2.287	4.002	78.26	27.94
	L1403	DC2	9.823	2.357	4.19	22.68	4.41	10.055	2.468	4.104	58.57	18.65	9.815	2.366	4.175	79.85	39.59	10.118	2.518	4.046	82.93	46.14
	L1405	DC2	9.698	2.477	3.941	14.5	3.28	9.811	2.661	3.733	41.34	12.05	9.776	2.483	3.957	21.71	6.28	10.129	2.565	3.979	75.65	26.55
	L1406	DC2	9.855	2.404	4.122	10.78	2.69	10.212	2.453	4.198	26.17	8.14	9.65	2.451	3.966	52.48	16.13	9.967	2.465	4.076	52.93	16.09
	L1407	DC2	8.038	2.86	2.826	19.23	3.32	7.708	2.907	2.666	NA	NA	7.719	2.955	2.621	57.56	18.89	7.803	2.906	2.697	99.13	54.17
	L1408	DC2	9.662	2.484	3.917	9.29	2.31	9.275	2.394	3.897	14.12	2.12	8.805	2.277	3.883	11.5	2.2	9.219	2.339	3.969	33.63	9.49
	L1409	DC2	8.942	2.327	3.876	19.84	4.13	NA	NA	NA	NA	NA	8.734	2.368	3.702	70.22	21.73	9.343	2.426	3.88	93.54	49.5
	L1410	DC2	9.643	2.45	3.967	11.37	2.56	9.914	2.579	3.869	11.65	2.42	8.484	2.124	4.007	15.58	2.5	9.515	2.441	3.919	54.82	20.48
	L1411	DC2	NA	NA	NA	NA	NA	10.11	2.431	4.185	51.1	15.17	9.86	2.33	4.258	23.4	7.46	9.721	2.319	4.222	84.45	37.68
	L1412	DC2	10.157	2.543	4.032	16.73	3.47	10.31	2.672	3.878	59.03	15.32	10.14	2.562	3.975	34.19	11.32	10.462	2.66	3.962	91.42	43.61
	L1413	DC2	NA	NA	NA	NA	NA	9.548	2.53	3.8	13.85	2.85	9.412	2.509	3.767	22.8	6.81	9.591	2.512	3.852	64.69	24.55
	L1415	DC2	9.956	2.469	4.094	38.91	7.38	8.312	3.017	2.771	98.05	52.33	7.221	2.573	2.816	55.5	13.34	8.494	2.992	2.857	82.29	32.35
	L1417	DC2	9.853	2.49	3.986	12.3	2.23	10.193	2.616	3.926	24.39	6.91	9.838	2.544	3.884	15.82	5.39	9.812	2.493	3.968	80.41	33.51
	L1419	DC2	9.832	2.227	4.455	14.08	2.95	10.209	2.42	4.254	37.51	8.1	9.498	2.364	4.041	26.57	7.91	10.452	2.557	4.111	89.67	43.28
	L1420	DC2	9.296	2.447	3.817	6.16	1.78	9.733	2.548	3.85	100	58.19	9.561	2.486	3.868	75.66	23.16	9.452	2.432	3.927	92.53	41.73
	L1421	DC2	9.542	2.483	3.863	11.53	1.88	9.39	2.577	3.672	29.15	6.87	9.196	2.542	3.644	45.66	15.8	9.406	2.504	3.776	62.76	23.15
	L1422	DC2	9.706	2.262	4.338	7.89	1.65	9.692	2.405	4.067	10.39	2.61	9.864	2.396	4.138	21.6	6.89	10.077	2.423	4.185	29.45	10.56
	L1423	DC2	9.655	2.44	3.996	3.24	0.74	9.058	2.383	3.833	8.59	1.8	7.412	1.993	3.737	64.4	23.2	9.109	2.4	3.83	52.84	19.76
	L1424	DC2	9.105	2.46	3.722	8.06	1.45	9.243	2.511	3.697	36.83	8.53	8.883	2.495	3.569	14.34	3.47	9.235	2.526	3.69	58.77	19.28
	L1425	DC2	8.861	2.362	3.774	36.82	10.47	9.13	2.49	3.693	42.46	12.06	8.74	2.408	3.644	41.47	13.5	9.411	2.515	3.765	76.79	29.3
	L1426	DC2	9.868	2.44	4.073	8.99	1.63	9.759	2.515	3.917	9.15	2.55	9.57	2.44	3.951	36.91	9.73	9.88	2.565	3.884	46.82	16.57
	L1427	DC2	9.493	2.552	3.751	1.69	0.5	9.954	2.554	3.925	16.31	3.64	9.904	2.467	4.034	29.94	6.64	10.245	2.497	4.133	36.7	10.69
	L1429	DC2	9.28	2.404	3.89	11.86	2.1	9.649	2.486	3.93	16	3.52	9.127	2.428	3.773	47.45	17.52	9.607	2.489	3.886	79.49	29.08
	L1430	DC2	9.648	2.567	3.777	NA	0.03	9.765	2.446	4.032	18.51	4.84	8.289	2.053	4.065	45	13.38	9.837	2.378	4.172	55.7	19.84
	L1431	DC2	10.425	2.497	4.201	75.81	23.3	10.368	2.535	4.118	78.51	26.57	10.317	2.457	4.224	51.52	16.98	10.235	2.454	4.201	96.71	49.65
	L1432	DC2	9.392	2.29	4.129	13.13	3.25	9.797	2.381	4.14	15.48	4.69	9.556	2.344	4.094	33.6	12.69	9.681	2.351	4.15	90.41	46.8
	L1433	DC2	NA	NA	NA	NA	NA	9.754	2.668	3.697	NA	NA	9.071	2.641	3.451	NA	NA	9.073	2.595	3.517	NA	NA
	L1434	DC2	9.034	2.436	3.735	5.34	0.7	9.632	2.691	3.603	84.68	27.72	9.557	2.561	3.746	34.1	9.64	9.94	2.6	3.851	93.01	33.22
	L1435	DC2	9.324	2.564	3.668	11.72	1.84	9.709	2.77	3.522	89.36	32.33	9.526	2.619	3.656	53.32	16.93	9.882	2.714	3.659	92.89	43.48
	L1436	DC2	8.745	2.391	3.681	19.57	6.04	9.443	2.241	4.272	17.83	3	9.186	2.161	4.278	88.97	40.82	9.792	2.197	4.511	86.22	39.52
	L1438	DC2	8.561	2.567	3.353	2.39	0.45	8.704	2.547	3.436	39.01	8.54	8.565	2.418	3.553	21.66	4.9	8.49	2.409	3.545	67.51	24.14
	L1439	DC2	9.876	2.592	3.829	17.43	3.41	10.107	2.72	3.734	81.43	29.14	9.896	2.622	3.788	32.93	12.82	9.887	2.655	3.749	77.76	29.78
	L1440	DC2	9.481	2.525	3.788	8.61	1.67	9.407	2.351	4.032	10.21	2.24	7.95	2.021	3.952	32.25	9.56	9.663	2.412	4.035	30.64	10.7
	L1441	DC2	NA	NA	NA	NA	NA	9.442	2.3	4.153	15.08	3.25	9.13	2.378	3.858	9.88	1.93	9.147	2.331	3.945	27.08	7.6
	L1442	DC2	9.969	2.489	4.032	20.81	4.2	10.689	2.626	4.098	73.68	24.98	10.621	2.554	4.179	32.03	6.84	10.895	2.581	4.251	93.18	35.58
	L1443	DC2	NA	NA	NA	NA	NA	9.16	2.641	3.498	8.16	1.81	7.859	2.342	3.366	25.32	7.4	9.278	2.6	3.588	79.52	28.28
	L1444	DC2	9.872	2.533	3.923	3.97	0.81	9.261	2.541	3.671	6.54	1.1	8.965	2.559	3.514	37.78	7.64	9.293	2.444	3.832	45.03	14.96
	L1445	DC2	NA	NA	NA	NA	NA	8.72	2.309	3.801	31.35	9.86	7.339	1.976	3.729	26.15	11.39	8.721	2.303	3.813	47.77	20.82
	L1446	DC2	8.872	2.482	3.605	5	0.65	9.017	2.468	3.684	22.14	4.87	8.965	2.417	3.723	78.23	25.98	9.125	2.444	3.761	48.76	20.02
	L1447	DC2	9.693	2.352	4.164	10.85	2.79	8.833	2.649	3.353	50.16	10.34	8.548	2.496	3.439	16.4	3.49	9.051	2.558	3.559	35.89	11.49
	L1449	DC2	NA	NA	NA	NA	NA	9.475	2.43	3.938	10.09	1.91	9.536	2.348	4.08	45.81	15.87	9.891	2.364	4.208	NA	NA
	L1450	DC2	NA	NA	NA	NA	NA	9.814	2.588	3.821	31.6	5.99	9.389	2.689	3.51	50.91	12.8	9.215	2.666	3.482	47.57	12.41
	L1451	DC2	9.469	2.418	3.951	8.59	2.14	9.723	2.601	3.774	7.28	1.02	9.184	2.393	3.862	21.84	5.78	9.68	2.375	4.1	NA	NA
	L1452	DC2	9.464	2.408	3.977	12.96	4.15	10.283	2.687	3.844	64.91	23.5	10.105	2.564	3.957	63.19	21.16	10.435	2.634	3.986	69.14	23.67
	L1453	DC2	8.788	2.194	4.042	8.93	1.28	9.229	2.344	3.968	17.08	4.27	8.601	2.241	3.86	17.42	5.88	9.329	2.324	4.052	65.98	22.32
	L1454	DC2	NA	NA	NA	NA	NA	10.101	2.605	3.901	37.53	7.34	9.285	2.653	3.515	58.15	15.79	9.6	2.582	3.753	77.03	26.02
	L1455	DC2	9.828	2.393	4.159	56.88	18.29	10.175	2.471	4.161	58.32	16.23	9.98	2.42	4.152	63.14	21.6	10.07	2.44	4.176	91.33	45.91
	L1456	DC2	9.284	2.298	4.064	25.69	5.73	9.379	2.481	3.813	46.46	15.33	8.363	2.426	3.462	38.69	13.95	9.449	2.469	3.857	71.18	30.76
	L1457	DC2	10.428	2.311	4.534	5.95	0.8	9.159	2.599	3.545	29.37	7.87	9.374	2.523	3.735	26.61	9.63	9.421	2.553	3.713	36.11	9.81
	L1458	DC2	9.677	2.306	4.223	20.5	4.4	9.644	2.404	4.042	23.95	5.37	8.436	2.123	3.998	22.51	6.97	9.984	2.585	3.904	100	59.46
	L1459	DC2	9.334	2.436	3.873	5.7	0.65	9.79	2.541	3.895	24.61	6.21	9.178	2.468	3.746	58.78	18.33	10.048	2.51	4.037	67.98	24.4
	L1462	DC2	NA	NA	NA	NA	NA	9.877	2.538	3.92	82.62	22.68	8.596	2.249	3.853	95.2	50.92	NA	NA	NA	NA	NA
	L1463	8way	8.38	2.697	3.122	5.74	1.31	8.635	2.92	2.975	11.44	3.27	8.52	2.841	3.007	23.26	5.44	8.698	2.787	3.13	NA	NA
	L1465	8way	9.54	2.59	3.717	4.34	0.77	9.93	2.529	3.951	16.23	3.94	9.801	2.556	3.851	9.35	1.75	9.484	2.461	3.888	58.76	22.1
	L1466	8way	NA	NA	NA	NA	NA	8.88	2.393	3.743	68.91	20.4	8.43	2.243	3.778	85.38	36.74	NA	NA	NA	NA	NA
	L1467	8way	8.649	2.41	3.621	48.72	14.36	10.022	2.567	3.928	12.26	2.66	9.88	2.62	3.786	12.8	3.24	9.998	2.545	3.962	30.7	7.51
	L1468	8way	9.362	2.465	3.846	53.19	15.58	9.578	2.538	3.802	69.32	18.02	9.466	2.435	3.904	48.85	14.18	9.54	2.493	3.857	77.45	31.35
	L1469	8way	8.895	2.602	3.435	3.84	0.75	9.097	2.651	3.445	9.39	1.48	8.85	2.604	3.406	25.79	6.25	8.952	2.586	3.475	42.46	11.43
	L1470	8way	9.143	2.44	3.766	5.87	1.84	9.442	2.492	3.816	9.19	1.61	8.982	2.53	3.564	15.6	4.56	9.392	2.653	3.562	24.04	8.41
	L1471	8way	9.299	2.435	3.838	5.88	1.15	9.661	2.518	3.855	52.09	19.27	9.137	2.509	3.664	NA	NA	9.452	2.75	3.455	62.27	23.74
	L1472	8way	NA	NA	NA	NA	NA	9.987	2.67	3.769	15.71	2.15	8.349	2.497	3.356	16.7	4.38	9.673	2.687	3.622	NA	NA
	L1473	8way	9.104	2.532	3.613	5.94	1.5	9.087	2.599	3.517	18.93	5.34	8.991	2.609	3.461	8.51	3.2	9.192	2.552	3.626	40.75	13.12
	L1474	8way	NA	NA	NA	NA	NA	8.627	2.826	3.065	87.12	33.09	8.767	2.788	3.165	47.2	13.47	8.686	2.759	3.162	85.45	26.73
	L1475	8way	NA	NA	NA	NA	NA	9.867	2.66	3.735	6.4	1.16	9.54	2.908	3.292	22.22	4.71	9.816	2.665	3.711	36.46	10.2
	L1476	8way	9.211	2.378	3.89	15.8	3.32	9.226	2.502	3.711	34.44	7.26	7.65	2.079	3.702	71.33	31.54	9.286	2.498	3.741	68.74	27.55
	L1477	8way	9.42	2.681	3.531	46.17	16.08	9.437	2.712	3.5	80.73	22.02	9.529	2.74	3.487	56.79	19.79	9.64	2.707	3.588	NA	NA
	L1478	8way	8.448	2.673	3.181	13.6	1.87	9.59	2.757	3.491	5.55	1.19	NA	NA	NA	9.54	2.62	9.538	2.549	3.762	37.27	8.47
	L1479	8way	8.295	2.291	3.651	7.76	1.44	8.276	2.251	3.71	6.23	0.9	8.277	2.227	3.733	78.53	37.44	8.528	2.295	3.743	71.83	30.68
	L1480	8way	9.044	2.403	3.802	0.56	0.03	9.499	2.503	3.824	NA	NA	9.134	2.594	3.547	70.87	49.79	9.723	2.866	3.408	NA	NA
	L1481	8way	9.256	2.391	3.907	9.99	1.68	9.534	2.528	3.797	36.22	9.95	8.041	2.321	3.479	59.41	17.89	9.231	2.489	3.731	NA	NA
	L1482	8way	NA	NA	NA	NA	NA	NA	NA	NA	NA	NA	NA	NA	NA	NA	NA	8.698	2.446	3.589	26.19	10.94
	L1483	8way	8.565	2.655	3.255	37.84	10.5	8.837	2.62	3.397	61	20.26	8.447	2.568	3.301	45.49	16.04	9.09	2.632	3.472	72.82	21.68
	L1484	8way	9.227	2.554	3.63	38.11	10.29	10.032	2.682	3.758	17.58	3.7	9.361	2.514	3.735	70.24	26.77	9.748	2.559	3.835	53.33	24.43
	L1485	8way	NA	NA	NA	NA	NA	9.39	2.618	3.613	16.33	5.4	9.302	2.639	3.543	13.48	3.05	9.045	2.694	3.375	57.19	22.08
	L1486	8way	8.562	2.877	2.999	NA	NA	8.79	2.794	3.17	NA	NA	8.448	2.898	2.925	NA	NA	8.537	2.789	3.08	80.31	30.15
	L1487	8way	9.082	2.569	3.553	7.73	1.58	9.346	2.69	3.495	7.85	1.61	8.754	2.587	3.395	59.76	20.13	9.093	2.556	3.57	20.11	5.61
	L1488	8way	8.789	2.719	3.253	51.31	12.37	9.23	2.746	3.384	29.49	7.39	8.973	2.665	3.384	20.22	5.15	9.428	2.693	3.526	66.44	20.81
	L1489	8way	8.129	2.937	2.778	94.23	36.95	8.539	3.11	2.76	98.88	62.21	8.376	2.939	2.873	NA	NA	8.677	3.091	2.816	97.15	51.48
	L1490	8way	8.642	2.378	3.673	3.46	0.35	9.596	2.65	3.646	73.83	25.48	9.757	2.612	3.755	76.85	27.46	9.865	2.697	3.684	NA	NA
	L1491	8way	8.966	2.623	3.447	32.11	8.09	9.913	2.729	3.658	30.96	6.74	8.781	2.457	3.588	21.49	5.07	9.778	2.72	3.623	38.43	7.8
	L1492	8way	8.377	2.568	3.289	25.61	5.68	8.776	2.685	3.29	78.1	26.02	8.47	2.643	3.219	76.26	31.88	8.795	2.387	3.72	46.56	16.09
	L1493	8way	9.547	2.571	3.747	40.53	11.08	9.652	2.754	3.525	66.78	17.15	9.785	2.654	3.699	52.4	14.85	9.928	2.644	3.786	93.57	42.13
	L1494	8way	9.174	2.448	3.777	30.01	7.12	9.639	2.458	3.949	59.27	13.9	9.539	2.459	3.897	76.56	31.24	9.677	2.444	3.987	91.32	43.27
	L1495	8way	7.921	2.514	3.168	16.79	4.01	8.157	2.575	3.185	72.14	25.44	7.969	2.497	3.204	64.27	28.18	8.048	2.558	3.165	93.61	53.15
	L1496	8way	9.576	2.442	3.941	6.42	1.25	9.685	2.563	3.811	NA	NA	9.474	2.59	3.689	NA	NA	9.728	2.698	3.634	28.19	8.48
	L1497	8way	NA	NA	NA	NA	NA	9.283	2.719	3.437	42.84	7.56	9.073	2.675	3.403	46.77	11.67	NA	NA	NA	NA	NA
	L1498	8way	9.56	2.352	4.096	5.53	1.05	9.865	2.461	4.049	25.88	6.8	8.766	2.557	3.461	16.33	4.08	10.229	2.423	4.255	74.04	34.17
	L1499	8way	NA	NA	NA	NA	NA	10.077	2.777	3.645	70.25	19.49	9.529	2.718	3.51	30.46	5.55	9.917	2.641	3.776	85.1	31.14
	L1500	8way	10.462	2.694	3.92	4.46	0.69	10.352	2.643	3.94	49	14.39	10.216	2.647	3.878	33.56	9.99	10.541	2.505	4.24	56.07	17.91
	L1501	8way	8.242	2.705	3.064	3.22	0.45	8.445	2.741	3.096	37.66	9.8	8.499	2.716	3.138	69.08	23.98	8.54	2.778	3.093	57.35	26.06
	L1502	8way	9.663	2.824	3.467	23.32	4.2	10.047	2.801	3.612	56.12	9.63	9.834	2.703	3.703	58.15	12.34	9.987	2.78	3.632	71.16	22.34
	L1503	8way	9.747	2.748	3.573	25.08	3.98	NA	NA	NA	NA	NA	9.328	2.685	3.493	84.4	40.66	9.723	2.738	3.575	96.96	54.96
	L1504	8way	9.204	2.758	3.357	61.38	19.07	8.959	2.771	3.241	99.65	60.91	8.518	2.667	3.204	36.19	9.37	8.971	2.728	3.304	94.94	49.07
	L1505	8way	NA	NA	NA	NA	NA	NA	NA	NA	NA	NA	NA	NA	NA	NA	NA	9.172	2.615	3.535	11.69	3.6
	L1506	8way	9.254	2.434	3.834	6.62	1.25	9.413	2.459	3.855	14.02	3.49	NA	NA	NA	58.23	17.93	9.527	2.419	3.97	31.36	11.78
	L1507	8way	9.262	2.438	3.842	7.64	1.2	9.187	2.665	3.468	11.19	1.91	8.801	2.579	3.426	20.39	5.49	9.095	2.577	3.556	41.31	14.53
	L1508	8way	8.527	2.696	3.179	4.66	0.8	8.516	2.668	3.213	18.87	4.28	8.136	2.781	2.936	49.57	16.54	8.47	2.863	2.973	65.24	26.41
	L1509	8way	8.454	2.687	3.158	37.42	9.1	9.954	2.877	3.477	89.25	27.44	10.053	2.848	3.544	36.08	5.14	9.966	2.837	3.527	84.92	31.39
	L1510	8way	8.169	2.615	3.154	8.53	1.87	NA	NA	NA	NA	NA	8.241	2.613	3.162	48.74	18.32	8.448	2.657	3.206	56.64	22.73
	L1511	8way	9.179	2.874	3.212	24.33	4.8	9.437	2.899	3.274	75.02	18.05	7.914	2.407	3.3	13.46	3.33	9.349	2.829	3.326	24.34	5.41
	L1512	8way	8.288	2.743	3.066	73.21	33.26	8.947	3.024	2.971	99.21	60.54	8.567	2.847	3.02	65.48	30.58	8.884	3.044	2.926	100	62.41
	L1513	8way	NA	NA	NA	NA	NA	9.475	2.529	3.776	54.85	15.41	9.32	2.477	3.779	68.7	22.3	9.3	2.431	3.854	57.03	19.02
	L1514	8way	8.345	2.412	3.479	NA	0.01	8.365	2.487	3.397	6.4	1.05	8.396	2.433	3.469	12.61	3.98	8.427	2.417	3.51	75.41	35.71
	L1515	8way	9.008	2.632	3.454	43.9	9.85	9.19	2.734	3.394	92.16	35.44	8.997	2.552	3.537	41.87	11.21	9.32	2.601	3.601	82.53	37.38
	L1516	8way	9.077	2.512	3.642	11.01	3.41	9.197	2.536	3.655	20.33	5.76	8.958	2.368	3.801	67.39	34.46	9.349	2.37	3.971	44.7	21.57
	L1517	8way	9.788	2.846	3.455	94.38	32.7	9.732	2.892	3.398	90.75	61.69	9.49	2.899	3.285	81.13	41.9	9.555	2.713	3.554	93.05	56.06
	L1518	8way	8.865	2.43	3.682	8.38	2.44	9.583	2.773	3.51	64.44	39.46	8.957	2.497	3.613	NA	NA	9.316	2.311	4.07	50.87	18.37
	L1519	8way	10.201	2.832	3.62	3.27	0.37	10.278	2.971	3.475	4.68	0.86	10.062	2.945	3.427	NA	NA	10.357	2.975	3.51	NA	NA
	L1520	8way	9.907	2.71	3.685	0.93	0.12	9.947	2.792	3.586	94.63	85.74	8.47	2.412	3.525	78.97	60.23	9.676	2.955	3.289	67.77	46.23
	L1521	8way	8.343	2.596	3.23	2.81	0.36	8.705	2.625	3.34	21.62	5.48	8.543	2.557	3.374	23.11	7.41	8.63	2.554	3.402	47.85	18.88
	L1522	8way	NA	NA	NA	NA	NA	8.621	2.639	3.283	9.47	1.79	NA	NA	NA	NA	NA	8.83	2.641	3.359	11.78	4.87
	L1523	8way	9.413	2.558	3.699	0.79	0.15	9.588	2.6	3.714	42	12.13	8.92	2.649	3.378	15.24	3.83	9.447	2.594	3.664	54.61	17.36
	L1524	8way	7.88	3.093	2.557	85.36	31.94	8.232	3.163	2.612	99.73	55.56	8.03	3.052	2.637	91.11	34.38	8.413	3.163	2.666	100	52.95
	L1525	8way	NA	NA	NA	NA	NA	9.122	2.754	3.329	20.96	3.54	9.247	2.764	3.359	NA	NA	9.169	2.599	3.549	NA	NA
	L1526	8way	NA	NA	NA	NA	NA	9.815	2.631	3.754	14.08	2.3	9.111	2.592	3.54	18.11	3.53	9.72	2.525	3.886	35.13	9.55
	L1527	8way	9.498	2.7	3.551	11.09	2.56	9.858	2.743	3.622	11.89	4.03	9.544	2.772	3.46	48.23	12.18	9.709	2.662	3.668	NA	NA
	L1528	8way	9.662	2.52	3.86	10.36	1.99	10.195	2.634	3.902	55.87	15.52	9.678	2.555	3.809	65.13	21.63	10.211	2.689	3.833	NA	NA
	L1529	8way	9.04	2.377	3.832	5.89	1.03	9.076	2.424	3.787	17.93	5.65	9.217	2.842	3.252	86.02	28.7	9.577	2.997	3.221	100	54.76
	L1530	8way	8.95	2.697	3.348	59.4	14.68	9.236	2.778	3.349	83.35	24.92	9.187	2.826	3.261	89.97	35.74	9.484	3.034	3.144	99.28	54.63
	L1531	8way	NA	NA	NA	NA	NA	10.039	2.722	3.713	100	90.23	9.996	2.747	3.657	83.78	66.5	9.945	2.672	3.751	NA	NA
	L1532	8way	9.145	2.606	3.526	NA	NA	9.125	2.673	3.426	8.22	1.36	9.207	2.665	3.466	11.23	3.04	9.192	2.571	3.593	46.14	13.09
	L1533	8way	9.47	2.671	3.564	15.95	3.23	NA	NA	NA	NA	NA	9.476	2.728	3.494	79.28	29.18	9.613	2.652	3.657	95.73	42.88
	L1534	8way	9.018	2.626	3.457	20.92	4.4	9.239	2.656	3.498	14.37	2.84	8.666	2.49	3.487	49.28	19.42	9.099	2.554	3.583	53.12	22.47
	L1535	8way	9.072	2.828	3.219	5.14	1	9.221	2.939	3.152	76.97	24.19	9.141	2.801	3.283	41	10.58	9.089	2.772	3.294	78.49	32.53
	L1536	8way	NA	NA	NA	NA	NA	10.294	2.809	3.7	100	92.81	10.22	2.794	3.678	96.81	73.31	NA	NA	NA	NA	NA
	L1537	8way	9.001	2.621	3.456	18.27	4.36	9.104	2.607	3.511	14.97	3.15	8.7	2.665	3.281	56.9	20.71	9.28	2.643	3.527	66.63	29.07
	L1538	8way	9.945	2.542	3.936	25.54	4.27	9.78	2.905	3.408	96.42	44.78	9.359	2.822	3.335	88.47	35.67	9.28	2.611	3.614	78.28	42.09
	L1539	8way	8.04	2.489	3.247	5.74	0.97	8.189	2.492	3.306	5.27	0.77	8.185	2.431	3.377	49.51	16.34	8.274	2.432	3.42	75.74	34.41
	L1540	8way	8.922	2.697	3.326	7.65	2.09	9.084	2.732	3.349	46.34	13.73	7.929	2.312	3.448	16.23	5.51	8.948	2.706	3.331	60.13	25.98
	L1541	8way	NA	NA	NA	NA	NA	8.729	2.749	3.194	34.74	9.41	NA	NA	NA	NA	NA	9.267	2.526	3.708	NA	NA
	L1542	8way	9.783	2.264	4.349	2.45	0.24	9.979	2.333	4.328	37.43	8.98	9.82	2.284	4.327	26.41	7.52	10.415	2.4	4.371	78.65	31.54
	L1543	8way	9.002	2.853	3.166	34.94	7.25	9.301	2.854	3.282	92.01	37.38	8.905	2.862	3.123	43.05	14.69	9.347	2.882	3.264	90.57	37.7
	L1544	8way	9.854	2.649	3.743	36.65	7.21	10.192	2.742	3.739	74.03	20.25	9.862	2.65	3.735	38.13	10.24	10.033	2.7	3.74	91.68	41.08
	L1545	8way	NA	NA	NA	NA	NA	9.736	2.582	3.8	73.8	23.43	9.649	2.546	3.814	70.29	30.67	9.538	2.63	3.655	70.94	33.57
	L1546	8way	NA	NA	NA	NA	NA	9.729	2.777	3.533	86.24	39.13	10.066	2.824	3.577	62.43	18.92	NA	NA	NA	NA	NA
	L1547	8way	9.346	2.629	3.585	36.91	8.17	9.792	2.718	3.632	32.62	8.69	9.977	2.688	3.732	30.59	9.8	9.94	2.793	3.577	88.57	37.65
	L1548	8way	8.66	2.274	3.838	41.34	10.38	8.888	2.579	3.469	64.37	22.67	8.641	2.386	3.648	85.95	37	8.92	2.413	3.728	75.23	27.76
	L1549	8way	9.708	2.551	3.824	4.68	0.48	10.081	2.621	3.873	8.8	1.67	9.74	2.548	3.837	11.5	2.33	10.396	2.669	3.923	63	23.74
	L1550	8way	8.897	2.466	3.626	21.96	6.09	9.271	2.486	3.764	20.16	5.5	8.828	2.37	3.747	52.98	19.72	9.29	2.487	3.757	57.97	24.83
	L1551	8way	9.119	2.45	3.763	61.9	14.55	9.361	2.734	3.449	91.94	36.99	9.145	2.534	3.626	74.36	20.63	9.769	2.675	3.681	NA	NA
	L1552	8way	9.167	2.537	3.641	37.94	10.83	NA	NA	NA	NA	NA	9.333	2.524	3.715	64.41	23.6	9.647	2.601	3.744	90.8	49.31
	L1553	8way	9.08	2.473	3.7	16.14	3.63	9.219	2.551	3.644	50.68	13.63	8.685	2.501	3.488	61.51	17.58	9.563	2.503	3.846	94.6	54.69
	L1554	8way	NA	NA	NA	NA	NA	9.887	2.611	3.812	12.16	2.1	9.585	2.882	3.341	29.92	7.35	9.635	2.73	3.55	NA	NA
	L1555	8way	9.3	2.683	3.481	28.32	4.7	9.52	2.715	3.528	30.35	6.44	9.288	2.657	3.51	27.46	5.58	9.514	2.608	3.665	77.41	32.7
	L1556	8way	9.156	2.492	3.696	16.12	3.08	NA	NA	NA	NA	NA	7.825	2.18	3.608	8.62	3.2	9.385	2.56	3.683	35.12	13.91
	L1557	8way	NA	NA	NA	NA	NA	10.092	2.873	3.536	100	92.94	9.849	2.746	3.601	91.33	70.59	10.114	2.804	3.631	NA	NA
	L1558	8way	9.616	2.477	3.907	4.28	0.74	9.625	2.638	3.674	41.02	7.44	9.574	2.472	3.904	15.85	3.35	9.719	2.449	3.997	22.54	7.46
	L1559	8way	NA	NA	NA	NA	NA	9.891	2.663	3.747	7.2	1.56	9.332	2.858	3.277	14.91	3.84	9.406	2.688	3.521	44.91	13.66
	L1560	8way	7.907	3.077	2.575	39.51	12.59	8.394	3.126	2.694	72.82	19.81	8.142	3.065	2.661	94.67	49.53	8.233	3.103	2.662	96.08	47.93
	L1561	8way	9.012	2.587	3.505	4.63	0.64	NA	NA	NA	NA	NA	7.686	2.261	3.411	64.48	24.01	9.182	2.596	3.563	25.35	6.43
	L1562	8way	8.285	3.016	2.76	82.93	24.11	8.712	3.078	2.843	84.03	20.7	7.287	2.566	2.846	94.1	36.78	8.766	3.071	2.864	98.06	42.84
	L1563	8way	8.964	2.571	3.509	26.2	4.88	NA	NA	NA	NA	NA	8.909	2.513	3.558	31.2	8.8	9.142	2.564	3.588	37.39	17.6
	L1565	8way	NA	NA	NA	NA	NA	10.01	2.98	3.386	50.68	13.17	NA	NA	NA	NA	NA	10.163	2.952	3.461	86.24	43.53
	L1566	8way	8.821	2.427	3.665	7.1	1.34	9.048	2.59	3.511	7.73	1.63	7.712	2.156	3.596	18.66	5.54	8.53	2.583	3.327	NA	NA
	L1567	8way	8.591	2.528	3.417	27.32	7.85	NA	NA	NA	NA	NA	8.548	2.381	3.606	57.61	18.64	8.365	2.521	3.338	45.52	15.5
	L1568	8way	8.56	2.426	3.547	4.96	1.2	8.979	2.539	3.569	7.38	1.66	8.458	2.496	3.422	74.77	31.63	9.069	2.513	3.629	42.56	14.93
	L1569	8way	8.991	2.536	3.591	21.02	5.13	9.431	2.421	3.924	11.63	2.23	9.139	2.398	3.846	62.21	21.78	9.339	2.552	3.696	67.78	31.49
	L1570	8way	9.997	2.443	4.117	29.65	6.77	10.205	2.44	4.22	45.54	12.23	8.345	2.044	4.113	67.45	24.35	10.252	2.707	3.805	58.47	23.04
	L1571	8way	9.215	2.546	3.646	3.8	0.72	9.245	2.508	3.717	6.85	1.79	9.01	2.436	3.721	27.14	11.34	8.973	2.381	3.799	40.36	13.62
	L1572	8way	8.233	2.887	2.863	93.23	38.57	8.52	2.919	2.932	85.75	24.8	8.216	2.88	2.862	94.29	40.18	8.514	2.98	2.87	100	56.62
	L1573	8way	8.191	2.576	3.193	28.47	5.54	8.521	2.631	3.259	59.68	16.58	8.327	2.587	3.232	51.1	18.21	8.358	2.598	3.234	72.73	24.87
	L1574	8way	7.955	2.916	2.746	84.44	23.89	8.608	3.087	2.812	89.09	42.97	8.17	2.845	2.884	92.38	35.69	10.116	3.035	3.35	85.04	40.65
	L1575	8way	9.478	2.506	3.811	37.66	7.16	NA	NA	NA	NA	NA	8.228	2.155	3.835	35.39	8.08	9.678	2.455	3.965	70.77	24.18
	L1576	8way	8.969	2.669	3.375	61.77	13.04	NA	NA	NA	NA	NA	7.713	2.394	3.236	45.24	10.45	9.244	2.804	3.31	100	50.71
	L1577	8way	9.639	2.382	4.079	11.78	2.71	10.152	2.494	4.102	13.9	3.49	10.049	2.515	4.024	25.43	7.77	9.977	2.502	4.013	50.38	17.58
	L1578	8way	8.788	2.509	3.531	1	0.18	NA	NA	NA	NA	NA	8.797	2.562	3.45	NA	NA	8.592	2.478	3.493	NA	NA
	L1580	8way	NA	NA	NA	NA	NA	9.658	2.535	3.853	10.58	1.75	9.537	2.56	3.749	21.74	5.72	9.549	2.633	3.653	52.36	13.99
	L1581	8way	8.799	2.373	3.744	30.01	7.17	9.106	2.286	4.01	13.9	2.91	8.9	2.309	3.871	79.89	35.14	9.08	2.42	3.788	75.1	34.78
	L1582	8way	9.591	2.519	3.835	11.61	1.82	9.755	2.545	3.862	66.62	15.56	9.776	2.567	3.824	NA	NA	9.759	2.549	3.861	57.83	17.5
	L1583	8way	NA	NA	NA	NA	NA	9.445	2.549	3.726	6.54	0.68	9.511	2.604	3.671	13.66	2.73	9.347	2.542	3.724	18.53	4.03
	L1584	8way	NA	NA	NA	NA	NA	9.53	3.072	3.116	99.63	56.32	9.28	2.994	3.111	94.68	37.59	9.33	3.018	3.114	NA	NA
	L1585	8way	8.693	2.282	3.85	9.17	1.49	NA	NA	NA	NA	NA	8.812	2.303	3.85	29.78	10.35	8.698	2.329	3.768	43.3	15.94
	L1586	8way	8.366	2.872	2.931	95.28	43.13	NA	NA	NA	NA	NA	8.697	2.82	3.108	84.5	38.53	8.877	3	2.973	93.57	40.11
	L1587	8way	9.793	2.437	4.043	6.89	1.39	10.138	2.578	3.961	22.66	8.23	9.839	2.531	3.91	30.57	8.36	10.097	2.562	3.969	23.83	8.95
	L1588	8way	8.803	2.725	3.248	8.87	2.1	9.14	2.72	3.381	19.9	4.39	8.794	2.767	3.187	15.69	4.55	9.11	2.669	3.437	30.47	9.66
	L1589	8way	9.264	2.566	3.648	15.82	3.68	9.5	2.607	3.664	32.82	9.25	9.079	2.522	3.615	76.87	35.5	9.252	2.546	3.66	55.42	22.65
	L1590	8way	8.5	2.578	3.31	2.75	0.48	8.85	2.624	3.392	27.37	6.35	8.551	2.559	3.351	17.33	4.08	8.956	2.585	3.486	40.77	12.72
	L1591	8way	9.317	2.43	3.867	10.93	2.94	9.612	2.438	3.971	20.41	5.68	9.658	2.402	4.048	68.08	24.7	9.821	2.475	4.002	44.68	15.42
	L1592	8way	8.494	2.406	3.567	5.5	0.92	8.947	2.356	3.83	29.83	7.45	8.775	2.408	3.666	57.8	20.82	8.924	2.45	3.674	70.79	31.73
	L1593	8way	8.989	2.451	3.688	8.03	1.55	9.406	2.635	3.592	93.49	39.38	9.097	2.621	3.486	57.94	20.8	9.507	2.7	3.539	67.44	29.95
	L1594	8way	8.237	2.555	3.248	22.6	5.33	8.977	2.488	3.638	30.17	8.69	8.538	2.574	3.325	49.82	16.15	8.866	2.637	3.374	51.93	19.18
	L1595	8way	9.026	2.819	3.226	29.66	10.77	NA	NA	NA	NA	NA	8.985	2.769	3.259	65.58	18.54	9.085	2.648	3.453	97.08	47.14
	L1596	8way	9.857	2.399	4.148	3.58	0.4	9.945	2.542	3.959	8.52	1.33	9.723	2.49	3.936	20.53	3.95	10.539	2.549	4.167	40.36	14.2
	L1597	8way	8.462	2.406	3.544	25.76	7.42	8.851	2.438	3.658	22.86	6.99	8.334	2.412	3.469	75.72	30.81	8.641	2.448	3.541	50.83	22.44
	L1598	8way	NA	NA	NA	NA	NA	9.481	2.423	3.94	12.13	2.28	7.698	2.011	3.845	37.39	10.95	9.516	2.423	3.957	38.55	14.04
	L1599	8way	9.55	2.332	4.132	11.49	3.28	9.969	2.471	4.078	41.58	13.34	9.758	2.362	4.157	57.45	27.73	9.468	2.427	3.938	34.06	14.82
	L1600	8way	7.988	2.548	3.166	16.87	3.94	8.405	2.605	3.247	16.79	4.27	8.209	2.611	3.163	82.28	40.01	8.244	2.557	3.251	83.13	44.79
	L1601	8way	9.622	2.471	3.933	85.33	29.99	10.033	2.579	3.92	93.61	38.52	9.376	2.286	4.128	47.97	14.65	9.433	2.305	4.139	32.46	12.6
	L1602	8way	9.159	2.2	4.244	40.45	10.71	9.34	2.674	3.578	63.36	32.86	9.262	2.321	4.041	68.06	21.88	9.165	2.426	3.817	25.3	9.31
	L1603	8way	9.362	2.451	3.852	6.15	0.79	9.601	2.58	3.76	32.91	7.86	9.509	2.467	3.886	19.84	4.69	9.667	2.542	3.828	62.6	29.14
	L1604	8way	NA	NA	NA	NA	NA	9.123	2.404	3.827	46.02	11.6	8.992	2.4	3.754	12.55	3	9.004	2.376	3.808	31.41	12.82
	L1605	8way	9.073	2.448	3.748	4.24	0.74	9.615	2.694	3.593	25.68	5.77	9.812	2.589	3.807	15.25	2.63	9.668	2.627	3.703	34.18	11.05
	L1606	8way	8.249	2.373	3.492	5.72	1.04	8.502	2.512	3.4	8.62	1.81	8.108	2.373	3.429	38.51	10.72	8.434	2.423	3.493	15.69	4.45
	L1607	8way	8.739	2.444	3.596	7.13	1.79	9.251	2.442	3.82	27.12	6.66	9.119	2.399	3.827	22.75	6.85	9.27	2.526	3.688	38.58	11.98
	L1608	8way	8.615	2.54	3.407	6.35	0.88	8.742	2.52	3.483	96.45	80.61	7.68	2.216	3.476	NA	NA	8.841	2.495	3.564	NA	NA
	L1609	8way	NA	NA	NA	NA	NA	9.193	2.633	3.509	89.53	38.27	9.045	2.531	3.587	64.27	22.89	9.312	2.573	3.637	NA	NA
	L1610	8way	9.67	2.675	3.644	73.67	22.6	10.139	2.787	3.655	85.83	30.98	9.973	2.734	3.675	81.25	37.8	9.981	2.979	3.373	92.37	44.11
	L1612	8way	NA	NA	NA	NA	NA	9.33	2.957	3.173	91.51	45.78	9.203	2.937	3.144	99.02	52.57	9.643	3	3.23	100	65.49
	L1613	8way	9.923	2.861	3.49	70.95	23.61	10.188	2.974	3.446	96.19	38.81	9.865	2.879	3.456	88.91	37.55	10.014	2.933	3.43	NA	NA
	L1614	8way	9.786	2.429	4.064	7.79	1.68	10.318	2.501	4.159	20.82	5.87	7.751	2.891	2.698	12.86	2.01	10.029	2.445	4.127	65.23	32.68
	L1615	8way	8.952	2.231	4.057	34.87	6.62	9.214	2.325	4.003	34.68	7.94	7.658	2.013	3.84	43.91	13.05	9.131	2.385	3.867	36.68	13.13
	L1617	8way	9.308	2.555	3.673	23.37	6.19	9.368	2.656	3.557	34.44	6.81	9.281	2.805	3.328	43.48	11.83	9.527	2.494	3.851	51.21	20.74
	L1618	8way	9.478	2.688	3.564	12.92	2.68	9.731	2.792	3.549	29.84	7.12	9.33	2.745	3.409	19.4	3.66	9.392	2.742	3.464	50.05	13.48
	L1619	8way	9.142	2.404	3.877	15.04	2.14	10.13	2.328	4.397	32.31	8.4	9.742	2.174	NA	23.57	4.45	9.965	2.223	4.52	NA	NA
	L1620	8way	8.846	2.38	3.74	8.42	1.88	8.937	2.536	3.551	23.75	5.07	8.958	2.459	3.659	49.66	14.94	9.119	2.518	3.636	26.99	8.21
	L1621	8way	9.887	2.565	3.876	75.81	25.21	8.844	2.543	3.503	19.52	4.63	9.893	2.603	3.817	74.69	28.81	10.264	2.703	3.815	81.27	42.46
	L1622	8way	9.506	2.827	3.376	2.09	0.41	9.538	2.878	3.322	98.85	88.13	8.901	2.785	3.205	72.99	55.34	9.603	2.86	3.373	NA	NA
	L1623	8way	NA	NA	NA	NA	NA	NA	NA	NA	NA	NA	8.392	2.699	3.124	NA	NA	8.278	2.56	3.252	NA	NA
	L1624	8way	8.95	2.778	3.239	8.07	1.46	8.907	2.767	3.238	29.53	6.97	9.032	2.81	3.226	15.41	3.16	8.972	2.733	3.296	61.78	19.18
	L1625	8way	8.884	2.521	3.546	1.79	0.39	9.227	2.671	3.479	28.59	9.52	NA	NA	NA	NA	NA	8.973	2.651	3.411	53.39	20.04
	L1626	8way	9.298	2.832	3.302	45.46	9.95	9.691	2.661	3.663	33.09	6.9	9.054	2.111	4.325	22.73	4.36	10.09	2.491	4.09	82.81	40.96
	L1627	8way	8.56	2.521	3.424	15.29	4.75	8.577	2.501	3.458	22.46	6.33	7.325	2.124	3.475	18.69	5.92	8.477	2.476	3.449	64.39	31.03
	L1628	8way	8.864	2.411	3.707	2.52	0.54	9.149	2.485	3.71	20.22	3.81	8.864	2.639	3.377	18.9	6.08	9.221	2.535	3.661	57.1	22.68
	L1629	8way	9.587	2.621	3.674	27.65	5.86	9.195	2.804	3.298	29.36	8.16	9.058	2.787	3.262	9.07	2.7	8.903	2.64	3.392	39.21	8.59
	L1630	8way	7.824	2.75	2.863	7.49	1.53	8.058	2.735	2.964	17.17	4.48	7.976	2.762	2.901	NA	NA	7.919	2.647	3.005	23.04	6.33
	L1631	8way	9.267	2.762	3.391	44.81	11.86	9.334	2.829	3.327	75.21	18.21	8.105	2.299	3.544	33.93	10.72	9.135	2.521	3.659	45.57	15.97
	L1632	8way	9.287	2.745	3.403	8.2	1.48	9.619	2.829	3.424	96.65	39.69	8.85	2.427	3.669	53.78	19.42	9.629	2.68	3.617	92.85	37.91
	L1633	8way	9.309	2.651	3.531	24.69	5.88	9.302	2.744	3.406	92.28	59.4	9.286	2.545	3.661	65.94	43.43	8.99	2.565	3.536	NA	NA
	L1634	8way	9.398	2.33	4.052	3.67	0.74	9.836	2.483	3.999	16.93	3.43	9.563	2.407	4.001	26.79	7.07	9.908	2.463	4.041	21.56	5.51
	L1635	8way	9.39	2.591	3.65	1.37	0.13	NA	NA	NA	NA	NA	8.519	2.474	3.452	13.9	3.25	8.854	2.577	3.46	58.96	19.77
	L1636	8way	9.859	2.552	3.887	48.46	11.4	NA	NA	NA	NA	NA	9.627	2.585	3.75	35.96	10.8	9.718	2.614	3.745	97.88	54.56
	L1637	8way	NA	NA	NA	NA	NA	9.817	2.584	3.823	61.47	18.33	9.435	2.441	3.885	76.26	27.39	9.694	2.473	3.943	80.91	37.24
	L1638	8way	8.877	2.33	3.829	9.95	1.79	8.815	2.663	3.329	71.33	19.86	8.621	2.646	3.269	63.39	22.29	8.72	2.655	3.301	88.89	35.65
	L1639	8way	10.287	2.434	4.259	10.25	1.83	10.475	2.591	4.082	40.93	9.45	10.354	2.467	4.223	34.25	7	10.607	2.619	4.094	61.35	21.3
	L1640	8way	8.556	2.636	3.282	26.93	6.2	8.982	2.714	3.332	61.38	15.74	8.913	2.582	3.472	70.4	26.12	9.117	2.69	3.409	89.95	36.67
	L1641	8way	9.691	2.49	3.917	22.75	4.36	9.77	2.641	3.732	45.91	9.97	9.808	2.711	3.635	66.99	23	10.184	2.785	3.675	76.59	25.8
	L1642	8way	8.264	2.404	3.464	5.8	0.78	8.43	2.455	3.453	NA	NA	7.25	2.22	3.275	12.54	1.66	8.377	2.506	3.368	84.29	39.33
	L1643	8way	8.367	3.013	2.79	96.19	44.37	8.821	3.136	2.825	99.12	53.98	8.44	2.473	3.426	45.74	17.43	9.016	2.424	3.738	64.01	30.5
	L1644	8way	8.813	2.554	3.466	7.28	1.55	9.197	2.639	3.506	6.92	1.37	8.865	2.527	3.518	58.8	18.84	9.329	2.709	3.456	NA	NA
	L1645	8way	8.674	2.969	2.937	77.78	27.31	8.718	2.982	2.94	92.22	34.35	8.464	2.933	2.892	82.04	31.17	8.887	2.973	3.004	98.93	54.46
	L1647	8way	8.834	2.843	3.118	8.38	3	9.142	2.869	3.21	9.12	2.11	8.992	2.789	3.245	9.32	4.34	9.027	2.754	3.301	18.32	6.86
	L1648	8way	7.753	2.652	2.932	66.07	18	8.144	2.726	3.006	84.94	32.09	9.039	2.636	3.446	20.28	5.66	7.864	2.676	2.953	82.93	32.9
	L1649	8way	8.336	2.325	3.615	16.04	3.1	8.663	2.405	3.621	30.16	7.74	8.602	2.39	3.616	33.02	9.24	8.537	2.359	3.646	51.01	23.27
	L1650	8way	8.723	2.566	3.426	2.09	0.36	9.28	2.722	3.435	15	3.65	8.151	2.704	3.03	30.28	8.6	9.172	2.706	3.412	20.37	7.59
	L1651	8way	NA	NA	NA	NA	NA	9.638	2.463	3.949	68.82	19.2	9.313	2.514	3.717	NA	NA	9.672	2.431	4.007	65.67	17.77
	L1652	8way	NA	NA	NA	NA	NA	9.098	2.66	3.444	26.83	6.36	9.047	2.604	3.485	10.73	2.68	9.048	2.492	3.657	40.58	12.41
	L1653	8way	8.829	2.506	3.543	6.51	1.25	8.9	2.563	3.492	2.99	0.8	8.67	2.458	3.541	47.8	14.37	9.003	2.475	3.658	22.13	8.56
	L1654	8way	9.149	2.567	3.587	58.91	15.78	9.094	2.663	3.441	91.2	45.06	9.046	2.611	3.484	64.39	21.78	9.18	2.583	3.571	92.91	44.62
	L1655	8way	NA	NA	NA	NA	NA	8.444	2.616	3.265	2.72	0.67	8.252	2.742	3.017	NA	NA	8.192	2.725	3.019	NA	NA
	L1656	8way	8.727	2.448	3.596	92.91	39.25	9.228	2.48	3.762	91.64	37.98	8.973	2.302	3.921	84.07	35.24	9.101	2.395	3.837	86.17	33.09
	L1657	8way	8.984	2.621	3.457	14.64	2.88	9.171	2.558	3.611	10.02	1.65	9.12	2.595	3.527	67.02	22.55	9.223	2.634	3.522	38.89	11.19
	L1658	8way	8.949	2.316	3.891	80.67	15.84	9.053	2.417	3.788	97.43	44.53	8.835	2.326	3.824	61.26	15.09	NA	NA	NA	11.87	3.61
	L1659	8way	9.665	2.834	3.43	18.7	2.69	NA	NA	NA	NA	NA	8.874	2.507	3.556	71.59	40.69	9.059	2.426	3.758	49.39	33.74
	L1660	8way	8.76	2.417	3.645	4.13	0.85	8.92	2.45	3.676	6.57	1.27	8.838	2.472	3.595	8.93	2.36	9.106	2.492	3.676	17.66	6.28
	L1661	8way	8.687	2.201	3.98	6.07	0.81	8.664	2.191	3.993	24.01	4.08	8.83	2.334	3.804	27.87	8	9.317	2.395	3.925	21.52	6.87
	L1662	8way	9.173	2.52	3.666	11.69	2.67	9.261	2.659	3.506	20.67	5.19	7.777	2.183	3.577	26	7.75	9.111	2.587	3.536	36.48	12.94
	L1663	8way	9.608	2.706	3.58	50.52	11.59	NA	NA	NA	NA	NA	9.5	2.794	3.422	NA	NA	9.917	2.825	3.532	58.62	17.98
	L1664	8way	9.248	2.627	3.543	27.53	4.55	9.528	2.711	3.538	66.75	18.82	9.109	2.699	3.392	83.9	32.16	9.54	2.673	3.602	97.94	45.79
	L1665	8way	8.691	2.56	3.415	18.15	6.66	8.865	2.652	3.364	14.31	3.06	8.546	2.513	3.413	32.46	11.14	9.081	2.643	3.455	38.87	14.78
	L1666	8way	NA	NA	NA	NA	NA	10.52	2.522	4.202	16.13	3.57	10.292	2.424	4.267	37.52	10.99	10.172	2.439	4.205	55.03	19.8
	L1667	8way	8.062	2.512	3.233	3.02	0.3	8.37	2.587	3.251	44.96	8.63	NA	NA	NA	17.71	4.9	8.152	2.531	3.236	51.38	13.45
	L1668	8way	9.836	2.702	3.681	46.76	13.01	10.137	2.737	3.747	27.36	6.78	9.779	2.529	3.892	65.84	23.94	9.417	2.789	3.422	50.07	15.75
	L1669	8way	8.574	2.725	3.162	0.22	0.07	8.79	2.694	3.275	96.21	85.19	7.563	2.217	3.424	NA	NA	8.736	2.594	3.385	NA	NA
	L1670	8way	9.846	2.689	3.704	80.13	24.99	9.843	2.495	3.97	90.98	31.04	9.724	2.494	3.917	87.4	40.88	9.959	2.549	3.929	70.37	38.54
	L1671	8way	9.342	2.57	3.673	15.33	3.84	9.445	2.655	3.592	43.71	20.24	9.029	2.61	3.479	81.34	51.25	9.291	2.505	3.737	97.96	59.17
	L1672	8way	9.769	2.474	3.981	4.99	1.08	9.271	2.503	3.733	4.98	1.05	9.987	2.509	4.063	NA	NA	9.968	2.489	4.033	12.54	5.28
	L1673	8way	8.943	2.624	3.427	NA	NA	10.094	2.564	3.963	38.38	24.06	8.731	2.726	3.218	NA	NA	8.992	2.719	3.323	NA	NA
	L1674	8way	9.129	2.434	3.777	15.79	4.08	9.237	2.611	3.56	89.86	39.3	8.902	2.503	3.575	53.48	19.56	9.323	2.488	3.775	NA	NA
	L1675	8way	8.925	2.584	3.474	11.49	1.68	10.848	2.705	4.035	11.76	1.94	8.845	2.576	3.478	84.1	34.23	9.368	2.562	3.681	59.97	14.52
	L1676	8way	8.895	2.808	3.183	36.14	7.37	10.334	2.775	3.761	NA	NA	7.67	2.472	3.113	52.3	20.09	9.276	2.853	3.27	52.26	15.24
	L1677	8way	8.026	2.621	3.073	2.04	0.2	8.093	2.68	3.028	7.95	1.13	8.103	2.655	3.056	68.38	25.24	8.21	2.644	3.121	59.8	22.74
	L1678	8way	9.695	2.421	4.036	40.15	11.5	9.177	2.576	3.583	22.39	2.73	8.477	2.098	4.061	62.09	26.72	10.128	2.532	4.028	66.63	30.1
	L1679	8way	NA	NA	NA	NA	NA	9.862	2.553	3.885	84.44	32.91	9.074	2.526	3.612	69.48	44.99	9.096	2.629	3.493	83.75	39.94
	L1680	8way	9.787	2.409	4.092	29.47	4.82	10.024	2.704	3.743	37.76	10.14	9.445	2.517	3.77	65.83	23.11	9.597	2.523	3.834	51.1	15.85
	L1681	8way	8.931	2.444	3.685	0.64	0.04	9.409	2.984	3.168	89.22	35.76	7.996	2.165	3.712	NA	NA	9.344	2.461	3.83	NA	NA
	L1682	8way	10.638	2.685	3.981	12.11	1.53	10.326	2.494	4.176	5.77	1.02	10.386	2.708	3.852	30.86	9.64	11.053	2.806	3.959	52.86	13.88
	L1683	8way	7.992	2.492	3.219	5.55	1.19	8.054	2.482	3.275	20.7	6.63	8.209	2.489	3.309	41.52	12.76	7.791	2.441	3.208	39.22	13.49
	L1684	8way	8.574	2.396	3.615	86.28	30.91	9.055	2.502	3.645	57.83	15.4	7.546	2.08	3.65	62.14	26.41	8.77	2.39	3.695	91.58	39.66
	L1685	8way	9.359	2.671	3.524	80.65	30.44	9.55	2.619	3.674	90.74	35.64	9.115	2.536	3.616	83.99	36.42	9.729	2.622	3.731	93.08	39.41
	L1686	8way	NA	NA	NA	NA	NA	NA	NA	NA	NA	NA	10.288	2.544	4.07	14.31	3.47	10.359	2.497	4.185	34.86	10.05
	L1687	8way	9.019	2.379	3.838	0.56	0.07	9.227	2.395	3.883	0.93	0.14	7.825	2.107	3.739	87.98	68.25	9.267	2.378	3.944	NA	NA
	L1688	8way	NA	NA	NA	NA	NA	8.593	2.402	3.604	3.2	0.47	7.333	2.092	3.52	20.69	4.7	8.405	2.311	3.661	59.17	17.91
	L1689	8way	8.779	2.675	3.302	4.77	0.68	8.867	2.654	3.36	19.04	3.7	8.906	2.663	3.357	27.1	9.29	8.746	2.626	3.345	71.26	28.38
	L1690	8way	8.385	2.764	3.042	8.1	1.35	8.536	2.813	3.044	32.07	5.6	8.397	2.708	3.105	10.77	2.66	8.474	2.647	3.212	88.92	29.84
	L1691	8way	8.998	2.426	3.739	6.7	1.59	9.29	2.508	3.733	38.27	17.61	8.977	2.431	3.713	13.79	4.93	9.266	2.563	3.649	54.88	23.64
	L1692	8way	9.959	2.41	4.17	0.47	0.03	10.31	2.502	4.149	11.55	2.67	10.43	2.496	4.2	12.68	7.5	10.537	2.523	4.202	22.27	8.76
	L1693	8way	10.737	2.633	4.106	17.38	2.31	10.813	2.765	3.942	86.94	29.55	10.749	2.73	3.953	NA	NA	10.894	2.684	4.09	88.44	34.38
	L1694	8way	8.693	2.645	3.305	4.41	1.59	8.642	2.593	3.352	30.82	15.41	8.625	2.557	3.387	13.01	4.19	8.573	2.58	3.341	37.27	11.32
	L1695	8way	9.07	2.395	3.813	2.01	0.32	9.223	2.396	3.879	12.74	2.01	7.466	2.124	3.552	16.71	4.85	9.069	2.294	3.989	61.28	23.47
	L1696	8way	8.407	2.709	3.123	5.76	0.91	8.482	2.704	3.155	1.01	0.13	7.572	2.353	3.231	94.23	62.3	8.618	2.722	3.184	NA	NA
	L1697	8way	7.873	2.309	3.431	49.4	17.4	7.912	2.409	3.306	41.62	12.17	8.031	2.354	3.426	87.06	43.26	8.187	2.349	3.505	NA	NA
	L1698	8way	8.527	2.21	3.898	60.95	16.6	8.675	2.422	3.616	70.98	25.72	8.58	2.318	3.72	NA	NA	8.887	2.438	3.666	NA	NA
	L1699	8way	9.555	2.546	3.78	4.59	1.58	9.844	2.68	3.7	8.07	1.89	NA	NA	NA	30.17	10.93	9.428	2.612	3.632	59.05	22.63
	L1700	8way	9.17	2.687	3.436	4.73	1.16	9.433	2.766	3.452	47.18	11.49	7.96	2.333	3.427	9.01	2.05	9.499	2.73	3.504	81.87	34.58
	L1701	8way	8.973	2.313	3.916	3.42	0.49	9.351	2.386	3.952	15.99	3.23	7.896	2.017	3.939	68.69	23.36	9.328	2.338	4.019	62.17	22.13
	L1702	8way	9.788	2.485	3.971	31.48	8.08	9.999	2.666	3.771	96.94	50.6	8.606	2.255	3.833	68.73	25.64	10.057	2.592	3.922	88.76	47.68
	L1703	8way	9.335	2.748	3.412	83.07	19.45	9.437	2.816	3.373	86.95	19.06	8.686	2.881	3.032	67.67	25.28	8.913	3.068	2.926	NA	NA
	L1704	8way	8.638	2.725	3.186	8.46	1.75	8.854	2.739	3.251	45.38	10.11	7.718	2.376	3.255	14.09	2.94	8.925	2.711	3.317	87.74	37.09
	L1705	8way	8.48	2.595	3.284	5.94	1.24	8.872	2.701	3.301	6.06	1.41	8.845	2.705	3.275	5.48	1.7	9.308	2.763	3.38	NA	NA
	L1706	8way	9.51	2.578	3.719	9.04	1.75	9.6	2.573	3.764	31.05	8.02	9.277	2.466	3.784	32.08	7.68	9.465	2.451	3.892	NA	NA
	L1707	8way	NA	NA	NA	NA	NA	8.233	2.626	3.156	NA	NA	6.968	2.353	2.973	NA	NA	8.142	2.552	3.207	NA	NA
	L1708	8way	NA	NA	NA	NA	NA	NA	NA	NA	2.55	0.4	8.39	2.561	3.282	65.43	27.38	8.64	2.609	3.321	85.56	32.67
	L1709	8way	9.173	2.486	3.736	NA	NA	9.235	2.562	3.633	48	10.85	9.078	2.524	3.614	71.18	27.75	9.333	2.564	3.662	66.32	21.52
	L1710	8way	8.564	2.263	3.819	15.81	3.16	8.557	2.437	3.53	13.38	3.32	8.877	2.441	3.656	64.06	24.69	9.298	2.426	3.857	27.72	9.59
	L1711	8way	NA	NA	NA	NA	NA	9.576	2.525	3.818	27.33	6.05	9.494	2.506	3.805	18.06	3.95	9.637	2.507	3.872	55.91	17.41
	L1712	8way	9.988	2.598	3.873	16.29	3.41	10.345	2.578	4.043	42.07	11.19	8.707	2.201	3.976	16.29	4.13	10.016	2.58	3.925	63.99	20.88
	L1713	8way	10.053	2.756	3.671	6.95	1.14	10.184	2.791	3.671	43.05	9.49	9.438	2.694	3.521	32.53	11.67	8.945	2.643	3.407	49.5	18.19
	L1714	8way	8.636	2.712	3.193	10.5	2.28	8.865	2.729	3.263	86.86	29.83	8.791	2.688	3.28	44.61	15.13	9.499	2.737	3.491	80.59	26.67
	L1715	8way	8.795	2.501	3.536	23.29	9.1	10.042	2.598	3.899	99.74	83.26	9.925	2.655	3.76	83.05	43.28	10.348	2.691	3.886	NA	NA
	L1716	8way	8.813	2.54	3.496	4.85	1.1	9.146	2.561	3.595	4.43	1.12	8.955	2.556	3.521	6.84	2.1	9.164	2.593	3.562	21.26	6.6
	L1717	8way	8.417	2.375	3.556	5.58	1.06	8.68	2.471	3.53	31.06	7.45	8.272	2.424	3.425	40.99	12.22	NA	NA	NA	13.25	4.75
	L1718	8way	8.318	2.507	3.349	7.79	1.86	8.56	2.541	3.393	10.98	2.45	8.749	2.514	3.496	33.52	7.14	9.078	2.63	3.473	28.09	10.51
	L1719	8way	8.335	2.49	3.365	34.68	8.23	8.499	2.53	3.381	95.13	50.38	8.449	2.473	3.434	85.91	44.27	8.611	2.555	3.393	NA	NA
	L1720	8way	8.649	2.796	3.113	30.45	7.33	8.732	2.902	3.037	96.97	50.02	8.782	2.798	3.152	57.34	19.68	8.948	2.877	3.126	89.4	37.71
	L1721	8way	9.188	2.719	3.402	5.45	1.2	9.604	2.742	3.524	38.23	10.54	9.594	2.754	3.497	25.53	5.78	9.036	2.518	3.622	45.79	18.04
	L1722	8way	8.182	2.44	3.373	2.92	0.57	8.354	2.476	3.396	5	0.7	8.219	2.524	3.28	50.58	16.51	8.35	2.451	3.427	NA	2.91
	L1723	8way	NA	NA	NA	NA	NA	9.398	2.638	3.594	94.41	42.76	9.072	2.505	3.637	59.62	20.86	9.343	2.515	3.734	NA	NA
	L1724	8way	10.083	2.525	4.024	10.02	1.62	10.322	2.565	4.048	22.81	5.36	10.638	2.579	4.14	18.11	5.19	10.699	2.565	4.194	81.9	30.31
	L1725	8way	8.865	2.637	3.382	3.52	0.69	8.553	2.651	3.248	12.81	2.28	8.481	2.591	3.29	28.71	9.29	8.976	2.484	3.641	61.98	28.09
	L1726	8way	9.895	2.704	3.679	1.81	0.28	10.059	2.67	3.804	13.88	2.75	10.133	2.696	3.768	NA	NA	9.995	2.641	3.807	26.21	4.82
	L1727	8way	9.127	2.416	3.81	35.57	5.84	9.547	2.52	3.815	84.48	25.82	9.33	2.533	3.707	34.59	8.67	9.321	2.452	3.828	76.79	27.7
	L1728	8way	9.057	2.664	3.413	8.08	1.49	9.192	2.578	3.597	25.72	5.15	9.001	2.59	3.491	26.04	6.42	8.802	2.552	3.474	93.77	33.16
	L1731	8way	8.979	2.762	3.268	72.26	19.68	8.961	2.793	3.221	100	65.32	9.211	2.855	3.233	87.68	38.16	9.075	2.826	3.228	90.55	36.71
	L1732	8way	NA	NA	NA	NA	NA	9.028	2.586	3.522	13.36	2.59	9.1	2.614	3.506	7.96	1.84	9.066	2.434	3.752	23.17	7.69
	L1733	8way	7.707	2.414	3.208	74.71	29.25	NA	NA	NA	NA	NA	7.949	2.387	3.349	61.91	24.87	8.104	2.404	3.386	65.04	26.59
	L1734	8way	NA	NA	NA	NA	NA	9.74	2.515	3.897	63.94	19.58	8.333	2.176	3.847	87.12	38.58	9.57	2.471	3.902	58.97	20.29
	L1735	8way	9.022	2.506	3.624	1.53	0.24	9.213	2.549	3.646	8.23	1.61	8.975	2.564	3.516	25.65	6.58	9.016	2.44	3.724	NA	NA
	L1736	8way	8.302	3.025	2.753	95.53	36.57	NA	NA	NA	NA	NA	8.531	3.085	2.771	88.66	37.48	8.692	3.134	2.779	96.42	44.52
	L1737	8way	9.006	2.974	3.044	94.59	37.82	8.052	2.457	3.298	63.88	19.42	8.732	2.925	2.993	79.77	32.69	8.608	2.765	3.145	93.8	45.65
	L1738	8way	10.165	2.481	4.121	6.41	1.34	10.454	2.599	4.048	84.05	32.15	8.543	2.194	3.91	85.33	34.88	10.129	2.557	3.983	NA	NA
	L1739	8way	9.189	2.406	3.841	5.21	0.7	9.696	2.555	3.816	36.36	18.7	8.846	2.42	3.667	43.45	12.32	9.619	2.485	3.898	72.93	30.34
	L1740	8way	8.853	2.673	3.338	3.61	1.09	8.629	2.508	3.461	13.29	3.82	8.6	2.52	3.426	11.91	2.64	8.702	2.45	3.575	16.03	6.94
	L1741	8way	8.119	2.649	3.08	20.96	4.54	8.368	2.73	3.081	97.75	88.73	7.988	2.542	3.154	34.88	10.64	8.285	2.677	3.112	34.84	11.06
	L1742	8way	NA	NA	NA	NA	NA	9.49	2.47	3.881	0.92	0.17	9.306	2.581	3.625	NA	NA	9.496	2.449	3.906	99.02	51.47
	L1743	8way	8.59	2.941	2.933	24.65	4.8	8.751	2.994	2.934	90.57	34.24	7.528	2.485	3.042	21.75	6.5	8.577	2.83	3.044	94.15	37.64
	L1744	8way	9.554	2.504	3.85	0.21	0.01	9.904	2.441	4.098	1.6	0.35	9.501	2.454	3.889	NA	NA	9.006	2.356	3.853	70.82	59.8
	L1745	8way	9.478	2.474	3.864	1.22	0.39	9.733	2.451	4.004	7.76	1.98	9.277	2.405	3.882	11.56	1.8	9.605	2.353	4.107	16.61	4.22
	L1746	8way	8.59	2.305	3.765	64.77	21.52	8.606	2.333	3.73	53.32	14.47	NA	NA	NA	NA	NA	NA	NA	NA	NA	NA
	L1747	8way	8.499	2.42	3.551	42.93	12.83	9.075	2.562	3.584	25.05	5.26	NA	NA	NA	NA	NA	8.711	2.463	3.568	NA	NA
	L1748	8way	NA	NA	NA	NA	NA	8.896	2.611	3.436	3.58	0.58	8.639	2.705	3.201	9.12	2.8	8.812	2.531	3.505	13.23	3.9
	L1749	8way	7.938	2.596	3.077	17.18	4.42	8.095	2.643	3.078	16.23	3.5	8.122	2.57	3.168	55.47	17.34	8.193	2.556	3.228	35.52	16.29
	L1750	8way	8.944	2.558	3.516	4.06	0.87	9.109	2.611	3.516	17.89	3.78	9.166	2.63	3.5	11.03	2.9	9.327	2.604	3.606	77.42	22.94
	L1751	8way	8.308	2.587	3.233	4.89	1.12	8.366	2.618	3.214	5.03	0.95	7.172	2.157	3.334	34.22	10.55	8.346	2.568	3.268	14.7	4.43
	L1752	8way	9.789	2.58	3.819	14.57	1.9	9.977	2.649	3.794	82.66	30.46	7.325	2.384	3.083	NA	NA	8.421	2.688	3.141	NA	NA
	L1753	8way	8.708	2.402	3.647	43.61	14.73	8.851	2.369	3.775	30.04	9.72	7.539	2.039	3.716	76.17	29.27	9.564	2.487	3.869	NA	NA
	L1754	8way	7.751	2.452	3.176	1.62	0.19	7.854	2.468	3.199	9.3	1.7	6.769	2.091	3.25	64.89	22.57	7.739	2.373	3.282	71.49	28.21
	L1755	8way	8.18	2.445	3.363	0.91	0.3	8.362	2.488	3.387	50.81	13.6	8.23	2.479	3.332	36.03	8.72	9.572	2.681	3.586	NA	NA
	L1756	8way	9.089	2.578	3.541	0.39	0.08	NA	NA	NA	NA	NA	9.243	2.72	3.434	12.77	2.86	9.322	2.617	3.581	18.53	6.83
	L1757	8way	8.434	2.493	3.402	1.26	0.35	NA	NA	NA	NA	NA	8.831	2.507	3.542	44.18	13.93	8.653	2.478	3.51	25.28	9.71
	L1758	8way	9.518	2.523	3.826	30.2	5.17	10.09	2.425	4.185	30.52	6.45	9.822	2.36	4.184	58.33	17.63	10.052	2.329	4.349	70.66	23.99
	L1759	8way	8.97	2.624	3.438	13.08	2.91	10.416	2.649	3.959	72	22.56	10.438	2.723	3.837	12.76	3.18	10.801	2.662	4.078	50.75	19.38
	L1760	8way	9.892	2.55	3.922	1.95	0.68	9.949	2.672	3.751	36.33	10.84	8.73	2.24	3.918	18.69	8.44	10.131	2.636	3.879	86.26	36
	L1761	8way	9.578	2.423	4.01	16.91	2.74	9.607	2.524	3.839	45.91	10.69	9.774	2.424	4.049	74.93	25.37	10.015	2.436	4.144	82.71	37.88
	L1762	8way	9.32	2.418	3.885	21.59	4.72	9.53	2.441	3.939	17.31	3.39	9.338	2.482	3.791	29.31	6.19	9.618	2.368	4.091	29.41	9.03
	L1763	8way	9.158	2.376	3.88	7.9	1.41	9.31	2.589	3.614	25.82	5.85	8.799	2.55	3.466	30.3	8.69	8.449	2.5	3.401	82.32	33.12
	L1764	8way	NA	NA	NA	NA	NA	NA	NA	NA	NA	NA	NA	NA	NA	NA	NA	9.589	2.642	3.658	NA	NA
	L1765	8way	9.1	2.781	3.293	12.21	1.88	NA	NA	NA	NA	NA	9.041	2.549	3.557	26.83	7.58	9.101	2.608	3.511	69.25	28.08
	L1766	8way	8.595	2.285	3.793	37.65	10.13	9.016	2.366	3.843	39.6	13.82	8.553	2.377	3.623	71.2	31.6	9.091	2.378	3.851	82.8	43.86
	L1767	8way	10.043	2.634	3.836	26.7	5.34	10.301	2.488	4.172	20.12	4.22	10.27	2.538	4.07	14.07	2.83	10.144	2.48	4.124	72.05	25.3
	L1768	8way	NA	NA	NA	NA	NA	NA	NA	NA	NA	NA	8.135	2.463	3.319	20.16	4.44	8.671	2.535	3.43	10.82	2.95
	L1769	8way	9.194	2.691	3.435	32.95	6.36	9.502	2.718	3.514	23	5.02	9.341	2.626	3.567	31.22	8.87	9.539	2.737	3.513	79.31	34.35
	L1770	8way	9.831	2.588	3.825	1.78	0.36	9.985	2.571	3.914	45.22	11.09	8.869	2.465	3.616	33.69	10.37	9.925	2.497	4.001	74.42	26.83
	L1771	8way	9.788	2.422	4.067	18.04	7.18	9.991	2.466	4.084	23.96	7.32	9.9	2.476	4.015	43.93	12.5	10.194	2.48	4.142	83	31
	L1772	8way	9.56	2.889	3.338	40.98	11.11	9.586	3.054	3.165	77.23	25.52	8.329	2.639	3.163	55.68	17.02	9.811	3.071	3.213	97.25	57.26
	L1773	8way	9.169	2.512	3.679	3.67	0.63	9.471	2.593	3.682	13.42	2.61	9.093	2.512	3.641	19.33	5.77	9.181	2.439	3.793	76.19	25.91
	L1774	8way	9.256	2.662	3.51	46.7	13.51	NA	NA	NA	NA	NA	9.357	2.781	3.38	41.91	11.54	9.621	2.794	3.468	97.49	43.16
	L1775	8way	9.068	2.723	3.368	34.65	8.35	NA	NA	NA	NA	NA	9.123	2.641	3.469	47.4	15.45	9.242	2.626	3.542	41.37	13.72
	L1776	8way	10.128	2.54	4.041	26.75	8.03	10.134	2.524	4.07	38.92	8.77	10.237	2.516	4.089	NA	NA	10.591	2.674	4.006	90.06	49.09
	L1777	8way	8.844	2.628	3.39	22.17	4.06	9.472	2.694	3.54	77.88	17.88	9.564	2.639	3.64	35.58	7.62	9.4	2.618	3.617	89	32.31
	L1778	8way	7.769	2.803	2.781	92.35	33.34	8.189	2.886	2.845	86.91	44.33	8.033	2.614	3.09	23.77	6.74	8.115	2.528	3.232	68.34	33.25
	L1779	8way	8.026	2.656	3.043	5.28	1.41	8.326	2.854	2.927	6.49	1.32	7.459	2.409	3.105	11.15	2.9	8.448	2.675	3.171	10.72	3.45
	L1780	8way	9.034	2.482	3.669	1.61	0.41	8.918	2.55	3.531	36.07	6.55	8.989	2.531	3.569	68.97	24.93	9.09	2.558	3.581	74.31	29.9
	L1782	8way	9.33	2.503	3.758	8.09	1.6	9.26	2.426	3.848	9.99	1.74	9.319	2.495	3.751	15	2.07	9.239	2.363	3.934	40.86	11.97
	L1783	8way	8.108	2.425	3.365	16.39	3.83	8.515	2.504	3.424	44.64	11.28	7.301	2.147	3.413	72.51	26.9	8.349	2.438	3.444	NA	NA
	L1784	8way	9.146	2.435	3.785	7.52	1.46	9.374	2.514	3.756	48.96	15.63	9.107	2.489	3.672	60.32	20.56	9.49	2.522	3.793	82.29	38.01
	L1785	8way	8.429	2.477	3.423	66.5	19.38	8.433	2.474	3.426	48.83	10.79	8.207	2.41	3.428	91.24	40.56	8.672	2.477	3.52	78.83	28.89
	L1786	8way	9.755	2.589	3.793	7.24	1.37	10.189	2.532	4.051	49.61	10.05	10.171	2.678	3.81	28.83	7.81	10.237	2.602	3.961	87.36	31.84
	L1787	8way	7.751	2.797	2.781	71.25	21.43	8.02	2.879	2.807	93.96	36.69	10.355	2.697	3.859	22.92	5.44	10.503	2.631	4.02	85.79	31.66
	L1788	8way	8.182	2.663	3.093	46.76	13.73	8.619	2.745	3.149	58.18	18.13	7.921	2.134	3.728	74.72	33.5	9.843	2.543	3.9	85.36	39.45
	L1789	8way	9.456	2.488	3.841	12	2.92	9.591	2.407	4.019	25.39	8.65	8.287	2.127	3.937	83.61	39.67	9.449	2.493	3.833	80.23	40.91
	L1790	8way	7.89	2.622	3.036	1.19	0.21	8.311	2.623	3.18	1.96	0.41	7.101	2.196	3.24	27.5	5.85	8.332	2.568	3.26	10.06	3.06
	L1791	8way	10.131	2.585	3.939	5.88	1.08	10.309	2.627	3.954	39.72	11.17	7.875	2.794	2.824	93.17	43.36	7.959	2.822	2.833	96.09	41.46
	L1792	8way	8.079	2.649	3.064	21.45	4.73	8.447	2.67	3.183	66.41	21.78	8.171	2.64	3.103	84.67	35.93	8.476	2.643	3.23	90.46	42.28
	L1793	8way	8.936	2.444	3.697	12.45	2.35	9.218	2.373	3.923	16.96	3.72	8.93	2.321	3.864	72.69	28.4	9.215	2.357	3.943	67.2	25.6
	L1794	8way	NA	NA	NA	NA	NA	8.641	2.655	3.282	33.41	9.43	8.57	2.646	3.249	35.51	10.97	8.609	2.559	3.392	NA	NA
	L1795	8way	9.23	2.764	3.357	11.1	2.74	NA	NA	NA	NA	NA	8.17	2.393	3.428	31.22	9.57	9.774	2.901	3.385	91.05	49.29
	L1796	8way	8.825	2.617	3.398	12.43	2.19	9.337	2.615	3.596	40.32	11.2	8.801	2.566	3.448	9.39	3.23	9.307	2.476	3.79	55.98	22.57
	L1797	8way	8.432	2.618	3.238	4.75	1.04	8.695	2.657	3.296	4.75	0.98	8.477	2.602	3.265	12.66	3.57	8.767	2.621	3.361	21.36	5.25
	L1798	8way	8.243	2.616	3.166	0.93	0.25	8.574	2.662	3.236	18	4.82	8.361	2.559	3.28	5.86	1.09	8.536	2.601	3.298	30.95	10.77
	L1799	8way	10.028	2.607	3.876	65.97	24.39	10.308	2.56	4.059	81.96	24.52	8.353	2.836	2.957	31.78	10.07	8.264	2.732	3.038	51.02	18.76
	L1801	8way	8.882	2.698	3.308	22.09	4.06	8.826	2.675	3.318	21.66	4.42	8.627	2.548	3.393	11.86	2.88	8.871	2.623	3.397	52.13	20.9
	L1802	8way	NA	NA	NA	NA	NA	8.383	2.735	3.083	34.25	9.42	8.266	2.742	3.03	30.73	10.15	8.572	2.722	3.161	46.87	18.12
	L1803	8way	9.312	2.456	3.817	15.11	3.57	9.356	2.583	3.657	53.9	14.94	9.248	2.525	3.678	63.26	22.56	9.705	2.557	3.823	83.71	34.76
	L1804	8way	8.242	2.667	3.113	91.58	43.02	8.253	2.83	2.932	84.1	30.14	NA	NA	NA	94.9	49.62	8.443	2.877	2.947	97.96	51.74
	L1805	8way	9.429	2.718	3.49	15.84	2.54	9.994	2.684	3.753	28.82	4.59	8.378	2.414	3.489	50.01	11.27	9.618	2.552	3.792	68.27	20.73
	L1806	8way	8.205	2.647	3.112	3.51	0.81	8.534	2.759	3.108	7.99	1.6	8.401	2.649	3.178	10.15	1.83	8.542	2.635	3.254	32.37	7.92
	L1807	8way	NA	NA	NA	NA	NA	8.981	2.832	3.187	51.48	15.37	9.123	2.763	3.315	29.49	12.68	9.067	2.736	3.334	NA	NA
	L1808	8way	10.191	2.955	3.483	95.43	24.51	NA	NA	NA	NA	NA	10.24	2.979	3.457	83.44	20.87	10.57	3.02	3.532	98.06	44.14
	L1809	8way	NA	NA	NA	NA	NA	NA	NA	NA	NA	NA	9.774	2.715	3.619	15.73	4.31	9.942	2.711	3.693	45.31	13.98
	L1810	8way	10.205	2.863	3.581	99.31	53.44	10.308	2.931	3.54	100	62.14	9.919	2.855	3.487	98.11	44.18	10.363	2.838	3.67	100	56.66
	L1811	8way	7.893	2.803	2.825	0.82	0.11	7.934	2.781	2.863	45.85	13.34	7.946	2.744	2.903	NA	NA	8.224	2.775	2.976	98.05	51.89
	L1813	8way	10.035	2.726	3.706	17.5	3.28	10.024	2.792	3.612	9.92	1.76	10.053	2.739	3.681	14.04	3.05	10.376	2.887	3.612	75.2	26.48
	L1814	8way	9.002	2.279	3.981	33.16	10.17	9.295	2.315	4.041	19.43	6.95	7.527	1.905	3.973	36.94	14.16	9.278	2.274	4.111	55.14	23.64
	L1815	8way	7.99	2.991	2.684	61.53	19.8	8.144	3.08	2.659	99	47.81	7.252	2.639	2.761	77.4	32.74	8.164	3.04	2.696	97.38	46.05
	L1816	8way	9.257	2.468	3.794	17.15	3.64	9.237	2.615	3.564	15.18	4.67	8.99	2.497	3.611	21.81	6.72	9.373	2.494	3.784	68.71	27.9
	L1817	8way	NA	NA	NA	NA	NA	9.02	2.446	3.718	3.67	0.56	8.535	2.478	3.456	9.51	1.61	8.815	2.396	3.699	27.33	8.02
	L1818	8way	9.045	2.466	3.704	14.84	2.63	9.234	2.535	3.663	38.6	7.97	8.96	2.47	3.644	69.26	25.96	9.081	2.436	3.76	66.89	28.44
	L1820	8way	8.751	2.694	3.282	19.26	4.05	9.029	2.796	3.246	57.92	19.11	9.792	2.64	3.735	38.12	8.99	8.868	2.698	3.303	86.02	28.41
	L1821	8way	9.836	2.84	3.485	90.49	24.55	9.796	2.985	3.323	98.25	47.85	9.712	2.875	3.391	94.24	43.46	10.007	2.928	3.436	95.98	33.23
	L1822	8way	8.304	2.411	3.478	17.62	4.7	8.461	2.334	3.654	33.45	10	8.296	2.312	3.608	71.89	37.12	NA	NA	NA	67.87	25.09
	L1823	8way	8.304	2.509	3.325	5.42	1.17	8.85	2.532	3.519	13.17	2.7	8.317	2.556	3.272	NA	NA	8.972	2.629	3.437	NA	NA
	L1824	8way	8.808	2.952	3.014	57.48	12.95	9.236	2.955	3.143	93.37	29.75	7.737	2.511	3.088	33.2	8.33	9.165	2.817	3.269	93.84	38.88
	L1825	8way	8.56	2.556	3.368	26.6	4.92	8.866	2.675	3.334	21.18	5.19	8.259	2.476	3.351	20.32	4.1	NA	NA	NA	NA	NA
	L1826	8way	7.872	2.698	2.927	35.36	10.81	7.866	2.83	2.792	74.58	23.62	8.096	2.785	2.915	32.38	6.88	8.117	2.804	2.906	94.95	40.83
	L1827	8way	8.259	2.984	2.782	100	54.63	8.686	3.042	2.88	97.68	54.44	7.642	2.359	3.246	13.01	2.86	8.98	2.739	3.295	69.88	23.21
	L1828	8way	9.654	2.539	3.829	5.09	1.15	9.772	2.488	3.951	11.21	2.01	9.435	2.498	3.825	NA	NA	8.58	2.199	3.935	72.44	22.65
	L1829	8way	10.058	2.959	3.422	96.63	29.13	NA	NA	NA	NA	NA	10.058	3.023	3.343	95.46	45.78	9.905	2.999	3.329	97.05	41.97
	L1830	8way	8.978	2.684	3.361	2.1	0.39	8.779	2.74	3.216	24.7	5.57	8.854	2.667	3.33	10.51	2.31	9.401	2.64	3.575	46.51	15.62
	L1831	8way	8.352	2.762	3.046	20	2.77	9.684	2.63	3.73	7.91	1.74	9.471	2.66	3.576	NA	NA	9.434	2.547	3.732	55.89	14.55
	L1832	8way	9.143	3.004	3.078	NA	NA	9.226	2.848	3.28	2.25	0.28	9.079	2.941	3.116	NA	NA	9.444	2.816	3.381	NA	NA
	L1833	8way	NA	NA	NA	NA	NA	9.96	2.508	4	93.71	55.24	9.844	2.543	3.88	50.25	17.53	10.072	2.525	4.012	80.9	35.84
	L1834	8way	8.586	2.941	2.927	95.41	40.81	8.779	3.075	2.862	100	51.01	8.58	2.923	2.945	58.15	14.87	8.994	3.011	2.999	98.44	42.88
	L1835	8way	NA	NA	NA	NA	NA	9.806	2.679	3.691	9.08	1.34	8.655	2.565	3.383	12.58	2.84	10.017	2.712	3.719	32.05	7.94
	L1836	8way	8.585	2.733	3.162	24.59	4.36	9.082	2.741	3.344	88.95	24.32	8.552	2.678	3.204	75.12	23.75	9.261	2.797	3.324	97.9	33.18
	L1837	8way	8.643	2.639	3.292	16.87	2.92	8.786	2.73	3.251	50.24	9.49	8.603	2.669	3.232	22.06	5.44	9.014	2.695	3.358	96.02	46.69
	L1838	8way	NA	NA	NA	NA	NA	8.94	2.744	3.271	97.99	82.73	8.904	2.62	3.409	NA	NA	9.08	2.66	3.431	NA	NA
	L1839	8way	8.121	2.498	3.275	49.45	16.91	8.488	2.57	3.327	81.73	35.69	8.318	2.478	3.367	78.37	34.93	8.393	2.506	3.365	83.64	40.74
	L1841	8way	NA	NA	NA	NA	NA	9.547	2.575	3.739	91.19	32.58	9.178	2.507	3.677	54.86	18.48	9.717	2.568	3.807	87.51	38.7
	L1842	8way	7.913	2.769	2.878	0.48	0.04	8.089	2.647	3.073	6.98	1.28	8.332	2.656	3.149	NA	NA	8.639	2.568	3.386	70.28	27.73
	L1843	8way	9.598	2.822	3.417	88.94	30.16	9.923	2.821	3.532	87.69	30.09	9.783	2.701	3.636	54.37	12.98	9.705	2.608	3.741	72.72	22.44
	L1844	8way	10.23	2.817	3.647	7.06	1.46	10.361	2.87	3.635	95.16	80.18	10.151	2.858	3.562	97.89	72.29	10.471	2.868	3.669	NA	NA
	L1845	8way	7.379	2.466	3.011	33.61	7.53	7.557	2.497	3.041	64.48	20.14	7.536	2.424	3.12	68.6	27.39	7.597	2.494	3.06	68.94	30.36
	L1846	8way	8.662	2.496	3.497	16.92	3.12	9.183	2.51	3.688	83.65	26.88	9.103	2.533	3.619	67.68	18.91	9.091	2.363	3.879	81.37	22.96
	L1847	8way	8.024	2.382	3.42	3.03	0.57	8.123	2.489	3.281	4.11	0.96	8.088	2.456	3.302	34.27	10.18	8.322	2.419	3.464	31.64	11.12
	L1848	8way	9.385	2.413	3.965	5.77	0.63	NA	NA	NA	NA	NA	9.812	2.591	3.809	59.75	40.2	9.86	2.457	4.042	90.26	49.35
	L1849	8way	9.404	2.412	3.931	8.78	1.81	9.717	2.466	3.966	58.31	15.12	9.16	2.418	3.808	62.17	19.64	NA	NA	NA	NA	NA
	L1850	8way	8.437	2.563	3.311	7.42	1.5	8.695	2.621	3.336	16.32	3.29	8.651	2.638	3.295	53.01	18.82	8.753	2.653	3.32	75.25	27.99
	L1851	8way	9.296	2.647	3.546	18.97	5.69	9.522	2.592	3.707	40.15	15.03	NA	NA	NA	NA	NA	9.096	2.541	3.595	NA	NA
	L1852	8way	9.495	2.601	3.689	16.33	2.23	9.578	2.497	3.865	80.69	26.3	9.408	2.509	3.773	30.3	6.54	9.424	2.461	3.853	95.29	39.38
	L1853	8way	9.277	2.807	3.323	55.71	14.63	9.105	2.718	3.366	29.67	6.42	8.694	2.686	3.243	44.04	12.54	9.641	2.751	3.523	77.17	26.94
	L1855	8way	9.401	2.577	3.679	49.62	13.93	9.577	2.587	3.733	79.14	21.53	9.569	2.534	3.792	53.44	13.95	9.549	2.717	3.529	91	32.03
	L1857	8way	7.777	2.786	2.804	79.31	27.83	8.152	2.906	2.82	95.79	43.1	7.762	2.933	2.654	80.25	29.51	7.834	2.844	2.764	92.03	34.28
	L1858	8way	NA	NA	NA	NA	NA	9.952	2.759	3.629	4.55	0.8	NA	NA	NA	NA	NA	9.668	2.738	3.564	41.5	12.04
	L1859	8way	9.44	2.532	3.759	38.18	8.35	9.645	2.454	3.96	45.15	9.11	9.485	2.528	3.769	56.5	20.1	NA	NA	NA	NA	NA
	L1860	8way	8.549	2.696	3.187	33.1	8.37	8.698	2.732	3.193	46.52	13.6	8.567	2.613	3.287	27.32	7.18	8.828	2.658	3.336	NA	NA
	L1862	8way	NA	NA	NA	NA	NA	8.79	2.423	3.648	NA	NA	7.489	2.194	3.422	NA	NA	8.773	2.317	3.813	NA	NA
	L1863	8way	NA	NA	NA	NA	NA	9.908	2.838	3.513	7.82	1.49	9.405	2.899	3.258	43.41	9.32	10.034	2.792	3.613	NA	NA
	L1864	8way	9.753	2.713	3.623	86.63	23.86	9.789	2.856	3.451	97.34	49.83	9.494	2.741	3.476	80.12	26.24	9.835	2.747	3.6	98.12	48.84
	L1865	8way	9.695	2.521	3.871	6.77	1.31	9.667	2.523	3.869	NA	NA	9.427	2.523	3.754	6.99	1.33	9.83	2.422	4.084	19.87	6.12
	L1866	8way	NA	NA	NA	NA	NA	NA	NA	NA	NA	NA	9.499	2.852	3.348	17.36	3.62	9.76	2.677	3.667	NA	NA
	L1867	8way	8.693	2.596	3.367	5.28	2.51	NA	NA	NA	NA	NA	8.963	2.517	3.572	37.92	11.2	8.677	2.465	3.539	85.23	36.82
	L1868	8way	NA	NA	NA	NA	NA	9.996	2.719	3.704	1.43	0.12	9.564	2.837	3.396	5.91	1.83	9.669	2.707	3.595	41.48	11.63
	L1869	8way	7.955	2.898	2.762	0.68	0.07	8.229	2.849	2.9	0.74	0.21	8.064	2.804	2.883	17.21	3.46	8.068	2.804	2.888	NA	NA
	L1870	8way	8.58	2.623	3.288	26.93	6.52	8.717	2.704	3.236	94.25	44.67	8.688	2.667	3.27	NA	NA	9.672	2.615	3.73	81.72	38.37
	L1871	8way	9.086	2.787	3.284	5.81	0.94	9.076	2.746	3.326	6.29	1.23	9.662	2.584	3.771	26.48	7.19	9.709	2.603	3.757	NA	NA
	L1872	8way	8.089	2.471	3.292	12.48	2.69	8.071	2.457	3.304	7.76	1.12	8.265	2.535	3.277	11.34	3.21	8.274	2.523	3.294	68.5	21.61
	L1873	8way	8.335	2.661	3.148	8.01	2.12	8.686	2.794	3.12	7.75	1.75	8.544	2.748	3.116	6.36	2.17	8.837	2.83	3.135	29.3	11.69
	L1874	8way	9.053	2.859	3.186	97.2	42.41	9.298	2.871	3.256	99.73	47.34	8.277	2.519	3.297	97.1	40.38	9.595	2.96	3.261	99.27	54.54
	L1875	8way	8.765	2.812	3.136	32.51	8.15	9.025	2.92	3.109	89.13	23.49	8.94	2.8	3.21	26.03	9.26	9.223	2.9	3.201	79.46	29.11
	L1876	8way	8.392	2.502	3.378	1.43	0.14	8.021	2.762	2.934	12.07	5.69	7.519	2.202	3.425	24.7	5.05	8.737	2.55	3.447	57.67	19.59
	L1877	8way	8.738	2.38	3.688	4.28	0.82	8.871	2.369	3.775	11.03	2.53	8.578	2.369	3.636	57.59	18.23	8.938	2.303	3.907	56.54	20.24
	L1878	8way	8.346	2.485	3.385	1.93	0.77	8.434	2.516	3.395	11.31	2.55	7.455	2.207	3.391	60.85	14.06	8.667	2.452	3.556	74.54	28.08
	L1879	8way	NA	NA	NA	NA	NA	9.977	2.786	3.611	99.48	89.49	9.722	2.739	3.564	NA	NA	10.062	2.816	3.589	96.87	71.6
	L1880	8way	NA	NA	NA	NA	NA	9.955	2.579	3.889	44.88	16.24	9.983	2.655	3.773	19.33	3.97	10.02	2.558	3.942	95.15	49.02
	L1881	8way	NA	NA	NA	NA	NA	10.24	2.751	3.756	31.46	6.55	10.01	2.629	3.822	27.98	6.89	9.998	2.549	3.957	97.82	47.97
	L1882	8way	9.357	2.413	3.925	17.98	3.45	8.769	2.42	3.656	50.52	16.53	8.522	2.354	3.646	30.1	8.57	8.868	2.391	3.747	85.69	42.1
	L1883	8way	8.522	2.756	3.109	5.68	0.56	8.431	2.635	3.22	38.51	6.47	8.661	2.661	3.265	13.83	2.91	8.629	2.564	3.384	NA	NA
	L1884	8way	NA	NA	NA	NA	NA	8.534	2.932	2.96	90.54	38.64	NA	NA	NA	NA	NA	8.403	3.07	2.749	100	46.14
	L1886	8way	9.347	2.639	3.565	61.33	15.34	9.606	2.723	3.553	100	89.41	9.668	2.777	3.492	NA	NA	9.724	2.654	3.689	94.44	71.86
	L1887	8way	9.432	2.341	4.054	1.04	0.12	9.675	2.44	3.995	1.18	0.09	9.425	2.422	3.907	59.05	45.84	9.648	2.472	3.933	94.54	72.07
	L1888	8way	NA	NA	NA	NA	NA	NA	NA	NA	NA	NA	8.303	2.739	3.044	NA	NA	8.462	2.559	3.321	82.9	22.57
	L1889	8way	9.553	2.465	3.921	13.75	2.45	9.455	2.546	3.757	18.13	5.14	10.131	2.568	3.971	NA	NA	10.19	2.561	4.001	95.75	49.41
	L1890	8way	10.038	3.045	3.316	39.03	9.17	10.469	3.223	3.27	87.52	30.21	8.85	3.086	2.873	90.48	29.87	8.911	3.052	2.931	100	33.01
	L1891	8way	NA	NA	NA	NA	NA	8.986	2.847	3.177	92.08	22.17	7.452	2.573	2.901	95.15	30.4	8.857	2.817	3.161	96.05	36.99
	L1892	8way	9.94	2.522	3.978	24.07	4.49	10.163	2.527	4.061	32.49	7.39	10.204	2.589	3.962	8.93	1.24	10.381	2.557	4.088	78.53	29.49
	L1894	8way	9.177	2.529	3.646	6.59	1.2	9.365	2.605	3.624	17.38	3.94	9.325	2.545	3.684	12.49	2.3	NA	NA	NA	62.73	21.28
	L1895	8way	9.101	2.791	3.286	59.34	13.1	9.26	2.85	3.271	85.69	24.21	9.168	2.857	3.219	32.67	7.24	9.908	2.861	3.481	92.89	33.06
	L1896	8way	10.444	2.524	4.162	8.35	1.92	10.673	2.516	4.27	29.86	8.27	10.565	2.544	4.177	37.81	21.03	10.093	2.433	4.184	68.08	37.08
	L1897	8way	9.031	2.537	3.584	12.83	2.29	9.363	2.636	3.579	29.22	7.46	9.083	2.505	3.645	43.39	14.29	9.296	2.539	3.687	86.33	38.62
	L1898	8way	8.874	2.616	3.408	3.35	0.45	8.979	2.6	3.473	32.67	4.68	8.919	2.613	3.423	9.54	2.36	8.883	2.532	3.527	62.04	16.89
	L1900	8way	9.166	2.496	3.714	6.7	1.44	9.308	2.617	3.586	36.08	9.76	9.088	2.488	3.674	28.32	6.83	9.48	2.516	3.798	79.89	32.22
	L1901	8way	8.916	2.674	3.355	15.27	3.83	8.925	2.709	3.313	59.13	20.92	8.947	2.612	3.446	79.95	64.38	8.919	2.626	3.418	96.53	NA
	L1903	8way	NA	NA	NA	NA	NA	10.293	2.942	3.52	1.79	0.18	8.437	2.581	3.28	10.7	2.6	10.134	2.771	3.675	53.64	16.68
	L1904	8way	8.607	2.412	3.595	48.35	11.95	8.408	2.398	3.536	78.75	22.29	8.12	2.558	3.186	59.49	18.24	8.065	2.505	3.235	93.2	37.79
	L1905	8way	8.898	2.756	3.253	10.89	2.07	9.167	2.808	3.299	11.13	2.17	9.159	2.742	3.35	29.6	8	NA	NA	NA	94.66	41
	L1906	8way	9.52	2.589	3.704	2.75	0.64	9.741	2.577	3.808	11.33	2.5	9.734	2.573	3.799	8.6	1.63	9.711	2.468	3.96	21.03	4.64
	L1908	8way	NA	NA	NA	NA	NA	9.829	2.922	3.403	78.56	18.83	9.924	2.825	3.536	60.43	18.82	9.906	2.893	3.444	75.79	34.47
	L1910	8way	NA	NA	NA	NA	NA	8.929	2.467	3.654	8.5	1.71	NA	NA	NA	NA	NA	8.862	2.374	3.763	14.14	5.3
	L1911	8way	9.816	2.608	3.789	3.43	0.38	10.063	2.754	3.674	0.99	0.14	9.858	2.658	3.724	NA	NA	10.091	2.721	3.73	NA	NA
	L1912	8way	10.208	2.62	3.931	32.03	6.21	10.389	2.606	4.013	50.99	13.09	8.93	2.256	3.979	30.84	7.42	10.367	2.614	4.003	86.99	33.83
	L1914	8way	9.133	2.441	3.778	6.34	0.63	10.242	3.009	3.422	95.07	60.25	8.722	2.298	3.83	70.21	23.12	10.314	2.714	3.824	98.02	54.59
	L1915	8way	NA	NA	NA	NA	NA	9.707	2.52	3.89	32.9	6.98	9.555	2.367	4.059	91.51	42.41	9.897	2.448	4.073	NA	NA
	L1917	8way	9.033	2.453	3.71	8.41	2.44	9.38	2.494	3.785	11.23	4	9.101	2.38	3.838	7.21	5.36	9.014	2.4	3.781	36.34	16.61
	L1918	8way	9.225	2.429	3.84	13.94	3.03	9.899	2.63	3.803	17.89	4.33	NA	NA	NA	NA	NA	9.269	2.823	3.327	40.98	11.19
	L1919	8way	9.091	2.576	3.56	8.41	1.88	9.432	2.58	3.686	14.09	3.18	9.282	2.489	3.752	NA	0.92	9.64	2.658	3.65	NA	NA
	L1920	8way	NA	NA	NA	NA	NA	10.155	3.033	3.375	98.31	42.41	9.804	2.936	3.353	64.69	16.42	9.92	2.923	3.415	97.87	45.22
	L1921	8way	9.661	2.72	3.58	64.51	12.42	9.535	2.701	3.551	80.43	24.51	8.923	2.734	3.274	45.04	11.61	9.385	2.662	3.547	79.71	23.97
	L1922	8way	9.147	2.885	3.192	14.56	3.46	9.274	2.849	3.272	8.6	1.93	NA	NA	NA	8.2	3.14	9.326	2.88	3.251	42.33	15.67
	L1924	8way	8.312	2.679	3.115	8.59	1.67	8.651	2.828	3.067	9.28	1.63	8.505	2.659	3.222	32.7	11.33	8.652	2.676	3.245	14.32	3.11
	L1925	8way	8.606	2.454	3.529	15.53	5.55	9.057	2.529	3.605	19.82	3.65	8.928	2.407	3.735	25.63	10.86	9.091	2.489	3.674	55.95	22.49
	L1926	8way	9.223	2.814	3.355	43.18	6.47	9.65	2.836	3.427	61.04	15.06	9.376	2.702	3.491	46.94	15.31	9.394	2.69	3.521	NA	NA
	L1927	8way	8.221	2.435	3.398	9.15	1.64	8.331	2.459	3.436	28.11	6.71	8.338	2.391	3.504	72.32	32.13	8.389	2.409	3.51	88.23	43.92
	L1928	8way	9.279	2.442	3.83	4.32	0.48	9.377	2.414	3.92	4.57	0.64	9.101	2.531	3.624	NA	NA	9.458	2.439	3.901	58.29	14.88
	L1929	8way	8.617	3.005	2.878	76.01	20.24	8.783	3.108	2.837	99.69	56.59	8.583	3.103	2.776	90.34	33.77	8.909	3.062	2.92	NA	NA
	L1930	8way	10.246	2.684	3.847	4.98	1.37	10.273	2.745	3.772	14.85	3.86	10.365	2.743	3.796	5.52	1.22	10.415	2.645	3.961	NA	NA
	L1931	8way	8.517	2.743	3.126	7.98	2.47	8.699	2.747	3.188	6.19	0.9	NA	NA	NA	6.68	1.38	8.404	2.632	3.216	33.01	10.65
	L1932	8way	8.041	2.863	2.82	5.99	1.11	8.33	2.837	2.949	2.57	0.42	8.211	2.851	2.889	5.74	1.53	7.95	2.63	3.036	33.71	11
	L1933	8way	9.497	3.118	3.061	78.39	19.42	9.529	3.111	3.077	98.63	42.31	9.165	3.032	3.031	48.79	11.28	9.289	3.038	3.077	98.33	33.94
	L1934	8way	NA	NA	NA	NA	NA	NA	NA	NA	NA	NA	NA	NA	NA	NA	NA	9.02	2.533	3.604	28.83	9.48
	L1935	8way	9.197	2.96	3.12	71.39	14.94	9.337	2.909	3.227	43.39	11.32	9.007	2.856	3.162	17.12	3.97	9.184	2.76	3.345	88.04	31.28
	L1936	8way	9.409	2.491	3.81	29.61	7.52	9.965	2.449	4.106	35.9	7.7	9.641	2.438	3.99	64.49	22.79	9.983	2.499	4.031	NA	NA
	L1937	8way	7.816	2.445	3.234	26.08	6.58	8.607	2.443	3.565	28.93	7.71	8.005	2.477	3.246	31.61	10.46	8.091	2.453	3.323	58.43	27.86
	L1938	8way	NA	NA	NA	NA	NA	9.401	2.419	3.921	21.36	3.33	NA	NA	NA	28.58	10.43	8.9	2.555	3.516	59.76	22.87
	L1939	8way	10.111	2.593	3.927	89.7	27.27	10.071	2.578	3.954	49.95	9.66	10.329	2.548	4.079	70.51	21.29	10.239	2.574	4.015	84.44	35.19
	L1940	8way	8.223	2.958	2.793	2.86	0.24	8.22	2.904	2.844	1.61	0.16	8.057	2.851	2.843	68.5	51.52	8.864	2.88	3.097	85.21	69.33
	L1941	8way	9.026	2.626	3.463	3.82	0.71	9.886	2.558	3.9	7.23	1.23	9.975	2.583	3.88	9.82	2.51	9.999	2.504	4.023	53.3	15.18
	L1942	8way	8.755	2.448	3.62	73.86	20.02	8.925	2.503	3.594	67.85	17.06	8.826	2.409	3.681	66.48	22.75	9.509	2.625	3.652	78.76	33.73
	L1943	8way	NA	NA	NA	NA	NA	8.717	2.774	3.163	7.83	1.57	8.495	2.952	2.891	12.02	2.54	8.655	2.744	3.177	32.72	12.45
	L1944	8way	9.992	2.549	3.963	71.5	21.38	10.257	2.491	4.152	86.71	29.42	9.992	2.558	3.926	9.4	1.84	10.011	2.489	4.049	41.77	9.94
	L1946	8way	9.154	2.445	3.763	3.98	0.6	9.331	2.492	3.769	6.62	0.99	9.078	2.494	3.655	15.45	2.77	9.223	2.376	3.92	59.16	21.77
	L1947	8way	7.906	2.528	3.142	3.58	0.97	8.194	2.617	3.147	13.86	3.14	8.014	2.605	3.093	42.37	13.15	8.027	2.591	3.11	NA	NA
	L1948	8way	8.278	3.058	2.72	96.19	27.27	9.389	2.926	3.227	NA	NA	8.451	3.091	2.741	87.69	26.89	8.594	3.002	2.873	98.96	45.85
	L1951	8way	8.783	2.663	3.329	18.42	4.76	8.977	2.867	3.151	28.68	5.72	8.208	2.779	2.962	88.52	67.88	8.366	2.894	2.902	86.66	66.66
	L1953	8way	8.581	2.486	3.481	4.55	0.6	9.03	2.546	3.567	1.79	0.33	8.481	2.68	3.175	NA	NA	8.825	2.371	3.747	39.87	11.38
	L1954	8way	8.523	2.98	2.867	93.24	49.56	8.919	3.048	2.941	100	55.84	8.595	2.879	3.016	47.69	16.1	8.647	2.936	2.958	90.8	45.17
	L1955	8way	8.551	2.783	3.082	2.61	0.27	8.829	2.86	3.102	NA	NA	8.694	2.773	3.144	NA	NA	8.851	2.713	3.275	98.87	65.03
	L1956	8way	8.778	2.508	3.527	8.19	2.05	9.131	2.555	3.612	11.57	3.25	8.896	2.571	3.495	NA	NA	8.915	2.565	3.502	34.08	11.91
	L1957	8way	9.191	2.549	3.629	20	4.46	9.846	2.669	3.721	40.76	10.94	9.633	2.64	3.666	17.11	3.63	9.848	2.622	3.782	63.51	17.71
	L1958	8way	9.837	2.372	4.178	23.34	5.78	10.003	2.355	4.288	27.27	5.66	9.944	2.4	4.171	54.99	19.57	10.389	2.335	4.484	70.48	28.35
	L1959	8way	9.499	2.458	3.898	9.02	1.26	8.266	2.785	2.983	31.43	7.53	9.58	2.462	3.912	47.54	16.26	9.813	2.441	4.043	52.33	23.26
	L1960	8way	9.392	2.553	3.725	2.3	0.3	9.619	2.749	3.519	98.76	91.21	9.781	2.732	3.592	NA	NA	9.658	2.654	3.668	NA	NA
	L1961	8way	8.132	2.714	3.008	7.91	1.87	9.648	2.496	3.896	24.64	6.68	8.347	2.748	3.043	32.95	12.37	8.39	2.73	3.085	55.76	23.08
	L1962	8way	NA	NA	NA	NA	NA	9.016	2.813	3.22	27.89	5.67	8.913	2.84	3.149	31.6	5.53	9.044	2.7	3.369	NA	NA
	L1963	8way	NA	NA	NA	NA	NA	9.333	2.402	3.916	89.17	28.61	8.975	2.345	3.845	59.11	17.26	9.279	2.534	3.716	NA	NA
	L1964	8way	8.822	2.496	3.567	11.34	2.63	9.391	2.626	3.604	40.96	12.09	8.885	2.51	3.567	14.53	3.74	9.029	2.456	3.705	46.83	19.09
	L1965	8way	NA	NA	NA	NA	NA	9.333	2.72	3.459	13.16	2.75	9.177	2.746	3.351	15.75	4.06	9.572	2.654	3.629	57.32	16.72
	L1966	8way	9.849	3.028	3.279	100	NA	9.979	3.049	3.295	92.09	52.81	9.606	3.151	3.083	94.07	42.29	9.982	3.158	3.175	99.08	48.61
	L1967	8way	8.822	2.513	3.528	4.89	1.02	NA	NA	NA	NA	NA	9.028	2.543	3.56	NA	NA	9.09	2.494	3.663	65.25	21.86
	L1968	8way	8.851	2.629	3.391	30.61	9.04	9.232	2.82	3.295	26.19	8.77	9.206	2.704	3.425	28.83	8.22	9.348	2.775	3.396	79.75	32.68
	L1969	8way	8.961	2.518	3.58	5.69	0.96	9.447	2.752	3.46	15.99	4.1	9.054	2.555	3.563	18.84	5.34	9.365	2.541	3.711	NA	NA
	L1970	8way	9.435	2.548	3.739	1.2	0.32	9.229	2.548	3.658	12.59	2.36	9.42	2.539	3.74	21.15	7.27	9.588	2.732	3.533	42.02	13.26
	L1971	8way	NA	NA	NA	NA	NA	9.357	2.417	3.892	NA	NA	8.927	2.436	3.684	NA	NA	9.254	2.332	3.994	NA	NA
	L1972	8way	NA	NA	NA	NA	NA	8.385	2.675	3.152	22.32	5.35	8.782	2.757	3.202	NA	NA	8.446	2.626	3.235	NA	NA
	L1973	8way	9.358	2.284	4.135	6.16	0.76	9.266	2.27	4.135	19.95	4.6	8.382	2.004	4.217	65	21.74	9.698	2.251	4.353	61.18	24.22
	L1974	8way	8.396	2.46	3.44	89.58	32.54	8.855	2.502	3.576	93.56	40.06	8.937	2.429	3.706	57.38	26.38	9.012	2.426	3.747	84.74	36.35
	L1976	8way	NA	NA	NA	NA	NA	9.228	2.409	3.868	34.49	6.58	9.068	2.471	3.702	40.44	9.73	9.2	2.444	3.798	84.18	25.4
	L1977	8way	NA	NA	NA	NA	NA	9.99	2.926	3.444	46.3	7.24	9.423	3.135	3.001	82.71	20.15	9.837	2.991	3.311	NA	NA
	L1978	8way	9.541	2.485	3.874	5.45	0.86	10.041	2.708	3.738	84.66	23.84	10.054	2.642	3.828	60.07	18.04	10.199	2.651	3.865	90.72	41.34
	L1980	8way	9.426	2.475	3.861	0.22	0.03	NA	NA	NA	NA	NA	9.579	2.486	3.884	NA	NA	9.899	2.457	4.059	93.05	NA
	L1981	8way	8.559	2.521	3.418	79.71	27.86	8.736	2.516	3.502	45.99	11.93	9.084	2.476	3.682	27.28	6.99	8.795	2.429	3.656	69.16	24.4
	L1982	8way	8.665	2.487	3.508	68.38	18.6	8.95	2.513	3.592	NA	NA	8.739	2.427	3.613	46.62	14.84	9.007	2.464	3.683	NA	NA
	L1984	8way	NA	NA	NA	NA	NA	NA	NA	NA	88.22	38.25	8.695	2.795	3.124	97.56	68.02	8.551	2.61	3.304	NA	NA
	L1986	8way	9.093	2.469	3.729	7	1.38	9.732	2.576	3.808	12.81	3.66	9.513	2.465	3.887	22.17	7.33	9.641	2.468	3.943	NA	NA
	L1987	8way	9.372	2.657	3.55	43.8	8.36	10.067	2.94	3.442	52.61	8.16	9.526	2.76	3.47	70.66	18.38	9.931	2.833	3.533	90.17	25.65
	L1989	8way	8.044	2.396	3.39	55.53	15.02	8.122	2.483	3.298	22.78	3.87	8.143	2.405	3.401	28.28	8.68	7.96	2.389	3.352	53.33	13.76
	L1990	8way	9.314	2.701	3.482	28.48	7.72	9.701	2.833	3.452	83.45	31.17	9.428	2.724	3.476	78.53	31.33	9.163	2.539	3.641	79.78	36.92
	L1991	8way	8.079	2.418	3.367	26.22	7.03	8.288	2.408	3.464	63.04	20.78	8.136	2.201	3.711	22.72	5.56	9.349	2.523	3.732	88.86	40.45
	L1993	8way	7.973	2.902	2.762	82.56	26.84	8.38	3.055	2.771	98.96	51.84	8.248	3.059	2.703	93.08	50.2	8.106	3.093	2.631	98.93	61.29
	L1994	8way	9.722	2.57	3.811	52.68	15.43	10.029	2.588	3.893	98.56	54.36	9.563	2.499	3.845	90.36	39.25	NA	NA	NA	NA	NA
	L1995	8way	NA	NA	NA	NA	NA	8.745	2.578	3.415	4.35	0.77	8.397	2.764	3.043	13.67	2.46	NA	NA	NA	51.62	16.71
	L1996	8way	8.534	2.219	3.875	47.02	9.92	NA	NA	NA	NA	NA	8.334	2.438	3.442	19.38	4.33	8.568	2.537	3.394	48.44	17.42
	L1997	8way	NA	NA	NA	NA	NA	10.187	2.629	3.919	99.42	56.4	8.758	2.224	3.957	82.1	32.87	10.553	2.581	4.108	95.93	48.56
	L1998	8way	9.944	2.518	3.973	48.06	12.94	9.818	2.597	3.806	57.03	16.23	10.058	2.608	3.874	69.58	25.87	10.375	2.697	3.881	54.26	15.91
	L1999	8way	8.914	2.434	3.688	14.05	3.05	9.016	2.512	3.618	39.83	11.18	9.802	2.521	3.906	45.65	14	9.964	2.611	3.838	77.25	33.46
	L2000	8way	9.49	2.476	3.875	9.19	2.49	9.67	2.608	3.746	41.76	8.08	8.037	2.241	3.606	36.25	10.46	9.968	2.598	3.87	87.02	37.99
	L2001	8way	9.885	3.034	3.28	13.07	3.01	9.748	3.043	3.221	70.77	22.45	9.316	2.78	3.364	48.92	16.61	9.648	2.941	3.296	85.79	43.28
	L2002	8way	9.24	2.71	3.424	1.24	0.19	9.384	2.627	3.615	6.86	0.81	9.338	2.599	3.61	60.08	18.23	9.147	2.477	3.726	68.64	21.39
	L2003	8way	8.806	2.689	3.294	27.55	5.64	8.974	2.744	3.301	67.5	23.88	8.917	2.772	3.234	15.86	2.81	8.89	2.796	3.204	99.08	49.11
	L2004	8way	NA	NA	NA	NA	NA	9.423	2.565	3.716	16.9	2.75	8.067	2.168	3.742	46.31	10.84	9.325	2.448	3.842	NA	NA
	L2005	8way	NA	NA	NA	NA	NA	9.627	2.661	3.65	24.55	4.21	9.258	2.812	3.319	24.75	4.81	9.099	2.68	3.411	NA	NA
	L2006	8way	NA	NA	NA	NA	NA	9.326	2.659	3.526	5.82	1.26	9.324	2.658	3.525	48.37	18.32	9.376	2.585	3.646	94.28	36.41
	L2007	8way	9.375	2.709	3.491	4.09	0.57	9.31	2.806	3.334	100	93.2	9.094	2.734	3.351	NA	NA	9.589	2.857	3.376	NA	NA
	L2008	8way	9.141	2.693	3.417	4.11	0.82	9.433	2.781	3.41	100	92.77	9.887	2.589	3.838	87.11	57.22	10.394	2.68	3.894	NA	NA
	L2010	8way	9.431	2.464	3.866	47.15	9.99	9.658	2.536	3.848	71.25	18.69	9.401	2.568	3.672	64.24	16.03	9.389	2.496	3.788	99.14	42.04
	L2011	8way	9.59	2.498	3.874	6.51	1.96	10.148	2.514	4.081	7.36	1.01	NA	NA	NA	NA	NA	9.992	2.46	4.102	45.89	17.99
	L2012	8way	NA	NA	NA	NA	NA	10.28	3.081	3.369	94.43	26.77	10.257	3.238	3.181	97.26	32.77	9.816	2.956	3.352	96.6	33.01
	L2013	8way	8.349	2.547	3.295	2.4	0.75	8.424	2.507	3.387	32.4	8.78	8.388	2.4	3.517	19.21	6.52	8.441	2.392	3.55	73.73	30.47
	L2014	8way	9.161	2.897	3.172	88.43	26.99	9.358	2.935	3.203	95.7	49.91	9.048	2.943	3.079	91.27	36.13	9.415	2.97	3.182	99.13	49.5
	L2015	8way	NA	NA	NA	NA	NA	NA	NA	NA	NA	NA	9.612	2.867	3.361	16.92	3.59	9.79	2.846	3.453	89.39	43.49
	L2016	8way	NA	NA	NA	NA	NA	8.552	2.431	3.557	8.72	1.28	NA	NA	NA	NA	NA	9.513	2.757	3.479	NA	NA
	L2017	8way	8.996	2.592	3.491	14.15	3.51	9.101	2.671	3.434	17.14	5.74	9.097	2.539	3.595	14.12	5.76	9.218	2.527	3.685	35.56	18.65
	L2018	8way	8.58	2.644	3.265	67.66	19.34	9.312	2.537	3.699	87.93	36.78	9.898	2.572	3.867	26.65	7.1	9.315	2.391	3.937	60.42	21.97
	L2019	8way	8.953	2.504	3.615	78.03	24.34	9.339	2.469	3.82	92.67	35.14	8.987	2.508	3.605	64.97	20.48	9.07	2.356	3.89	NA	NA
	L2020	8way	NA	NA	NA	NA	NA	9.864	2.989	3.324	100	67.65	9.77	2.948	3.328	75.53	28.07	9.88	2.939	3.386	77.28	33.33
	L2021	8way	9.411	2.535	3.749	22.19	4.62	9.497	2.656	3.603	96.45	45.11	9.249	2.557	3.633	68.29	22.47	9.718	2.564	3.822	77.89	35.66
	L2022	8way	10.231	2.825	3.655	58.07	12.7	10.486	2.991	3.532	97.06	37.41	9.818	2.932	3.366	68.51	18.35	10.441	3.173	3.315	NA	NA
	L2023	8way	8.738	2.651	3.317	NA	NA	8.79	2.816	3.137	90.76	35.24	9.025	2.742	3.299	80.93	37.78	9.539	2.781	3.447	94.31	60.58
	L2024	8way	8.123	3.004	2.717	75.34	24.01	8.333	2.975	2.811	96.74	43.76	8.224	2.989	2.755	95.94	45.35	8.493	3.01	2.83	100	45.18
	L2025	8way	8.964	2.597	3.476	7.35	1.58	9.016	2.627	3.455	8.9	1.73	8.61	2.583	3.344	NA	0.88	8.78	2.592	3.411	19.13	7.53
	L2026	8way	9.104	2.601	3.542	1.48	0.27	8.161	2.804	2.925	NA	NA	9.096	2.72	3.358	14.83	3.72	8.841	2.61	3.409	75.16	33.55
	L2027	8way	9.09	2.631	3.487	10	1.84	9.16	2.654	3.486	34.61	8.52	8.752	2.585	3.404	55.61	17.92	8.968	2.565	3.517	34.25	14.68
	L2028	8way	7.924	2.813	2.828	60.17	17.13	10.098	3.038	3.352	96.2	42.92	7.009	2.478	2.836	87.08	38.25	8.26	2.858	2.903	93.01	41.08
	L2029	8way	10.195	3.087	3.316	100	46.45	NA	NA	NA	93.19	48.5	9.603	3.036	3.169	99.21	49.33	10.49	3.159	3.336	99.11	62.11
	L2030	8way	8.196	3.064	2.684	99.59	56.52	8.53	3.096	2.77	99.75	64.47	8.396	3.002	2.807	95.89	51.43	8.602	3.033	2.85	100	51.83
	L2031	8way	9.862	2.79	3.56	6.21	1.17	9.819	2.67	3.712	3.33	0.41	NA	NA	NA	NA	NA	9.572	2.683	3.596	35.1	16.7
	L2032	8way	9.729	2.472	3.971	24.71	5.11	9.845	2.525	3.935	46.48	12.53	9.931	2.507	3.998	58.3	17.82	10.089	2.504	4.066	66.7	29.49
	L2033	8way	9.477	2.76	3.469	96.25	33.44	9.763	2.951	3.327	100	58.78	9.353	2.802	3.353	82.5	23.76	9.714	2.837	3.449	NA	NA
	L2034	8way	8.501	2.432	3.522	8.67	1.51	8.815	2.551	3.482	12.81	2.39	7.422	2.11	3.533	18.42	3.89	8.557	2.443	3.534	NA	NA
	L2035	8way	9.386	3.023	3.12	88.86	29.33	9.453	3.171	2.996	87.84	25.48	8.203	2.526	3.266	45.79	13.97	9.626	2.957	3.274	68.1	28.29
	L2036	8way	7.968	2.605	3.085	7.39	2.22	8.042	2.586	3.129	10.93	2.29	7.871	2.49	3.174	25.86	6.98	7.932	2.454	3.251	37.48	14.12
	L2037	8way	9.565	2.931	3.278	66.68	18.2	9.754	2.855	3.441	70.82	15.42	9.317	2.884	3.235	61.75	15.49	9.876	2.887	3.44	83.14	30.75
	L2038	8way	10.051	2.445	4.144	34.45	7.73	10.212	2.497	4.137	52.86	12.86	10.115	2.465	4.13	80.79	30.15	10.375	2.51	4.167	NA	NA
	L2039	8way	10.051	2.619	3.869	3.02	0.44	10.397	2.616	4.003	47.96	12.02	10.289	2.563	4.036	20.07	5.12	10.062	2.604	3.892	NA	NA
	L2040	8way	8.539	2.678	3.217	7.84	1.51	8.897	2.65	3.388	35.73	8.1	8.525	2.588	3.31	37.01	11.73	8.545	2.523	3.416	29.22	9.06
	L2041	8way	7.62	2.701	2.837	18.29	3.67	7.61	2.725	2.812	18.34	6.98	7.606	2.625	2.909	NA	NA	9.063	2.676	3.41	NA	NA
	L2042	8way	9.721	2.6	3.758	9.45	2.23	9.627	2.883	3.356	51.34	16.11	10.352	2.619	3.972	19.49	5.4	8.774	2.283	3.874	NA	NA
	L2043	8way	9.559	2.777	3.458	28.72	3.67	9.938	2.782	3.596	48.46	8.58	9.958	2.695	3.714	21.08	2.42	9.87	2.654	3.743	57.86	13.94
	L2044	8way	8.612	2.498	3.475	2.24	0.32	9.522	2.36	4.068	0.87	0.15	8.916	2.458	3.648	11.8	2.52	9.392	2.434	3.886	23.08	8.19
	L2045	8way	NA	NA	NA	NA	NA	8.798	2.561	3.461	9.04	1.45	8.631	2.472	3.506	14.52	2.73	8.744	2.48	3.551	18.04	4.1
	L2046	8way	8.886	2.367	3.781	8.79	1.28	9.184	2.47	3.751	11.24	2.82	8.684	2.293	3.824	56.98	18.83	8.983	2.397	3.79	75.33	39.7
	L2048	8way	9.416	2.705	3.497	8.86	1.76	9.48	2.666	3.575	44.52	9.04	9.179	2.631	3.5	24.31	7.32	9.293	2.568	3.638	69.38	17.56
	L2049	8way	9.012	2.423	3.757	19.57	5.14	9.367	2.521	3.744	32.1	11.27	9.186	2.433	3.794	19.29	6.06	9.551	2.46	3.905	NA	NA
	L2050	8way	8.551	2.467	3.525	14.53	2.49	8.657	2.415	3.615	50.12	13.35	8.902	2.464	3.64	47.62	16.6	8.877	2.407	3.724	65.52	26.19
	L2051	8way	9.049	2.57	3.546	15.89	3.99	9.289	2.667	3.51	16.78	4.63	9.152	2.533	3.632	40.96	16.43	9.588	2.63	3.675	NA	NA
	L2053	8way	9.905	2.664	3.75	41.13	8.58	10.108	2.741	3.716	99.01	50.22	8.555	2.319	3.708	83.65	36.36	10.235	2.745	3.745	64.14	26.93
	L2054	8way	9.565	2.726	3.533	12.77	1.7	9.748	2.745	3.579	79.41	25.71	8.973	2.72	3.313	29.17	6.41	9.598	2.618	3.692	47.22	15.29
	L2055	8way	NA	NA	NA	NA	NA	10.097	2.875	3.538	58.76	25.85	9.729	2.764	3.537	76.25	30.49	9.548	2.684	3.581	NA	NA
	L2056	8way	8.874	2.329	3.859	8.91	1.61	8.994	2.337	3.889	20.13	4.96	8.847	2.342	3.811	47.98	16.17	8.99	2.321	3.91	49.48	19.78
	L2057	8way	9.352	2.599	3.618	0.94	0.06	9.565	2.578	3.734	3.54	0.6	9.626	2.869	3.389	27.39	5.77	9.743	2.857	3.44	NA	NA
	L2058	8way	9.573	2.624	3.674	12.6	2.62	9.757	2.724	3.606	57.5	13.26	9.759	2.73	3.587	66.48	20.52	9.583	2.569	3.757	NA	NA
	L2059	8way	9.301	2.534	3.692	18.92	3.78	9.431	2.518	3.778	44.11	14.51	NA	NA	NA	NA	NA	9.328	2.431	3.874	NA	NA
	L2061	8way	9.104	2.792	3.285	46.84	20.18	9.501	2.757	3.471	85.82	60.53	9.584	2.722	3.539	93.38	69.74	NA	NA	NA	NA	NA
	L2062	8way	9.475	2.502	3.811	13.52	3.15	9.971	2.625	3.822	27.95	6.58	9.678	2.45	3.972	30.08	9.04	10.101	2.489	4.089	74.2	37.78
