# Supplementary material for: Genetic background- and environment-independent QTL and candidate gene identification of appearance quality in three MAGIC populations of rice
Source: Front Plant Sci. 2022 Nov 11;13:1074106. doi: 10.3389/fpls.2022.1074106 (PMC9697191; doi:10.3389/fpls.2022.1074106)
Supplement: Supplementary file 3 [file Table_2.xlsx]

## Sheet: Sheet1
	Supplementary Table S2 | Three accessions with largest GLWR and lower chalkiness and another three accessions with lowest PGWC and larger GLWR and their favorable alleles at important QTL/genes
	Trait/QTL	Performance and the favorable alleles at QTL a				Performance and the favorable alleles at QTL a
		L1352	L1422	L1692		L1660	L1716	L1745
	GL in 15_PX	9.466	9.706	9.959		8.76	8.813	9.478
	GL in 16_PX	8.309	9.864	10.43		8.838	8.955	9.277
	GL in 15_SZ	9.71	9.692	10.31		8.92	9.146	9.733
	GL in 16_SZ	9.417	10.077	10.537		9.106	9.164	9.605
	Mean	9.2255	9.83475	10.309		8.906	9.0195	9.52325
	GLWR in 15_PX	4.138	4.338	4.17		3.645	3.496	3.864
	GLWR in 16_PX	4.267	4.138	4.2		3.595	3.521	3.882
	GLWR in 15_SZ	4.121	4.067	4.149		3.676	3.595	4.004
	GLWR in 16_SZ	4.189	4.185	4.202		3.676	3.562	4.107
	Mean	4.17875	4.182	4.18025		3.648	3.5435	3.96425
	GW in 15_PX	2.307	2.262	2.41		2.417	2.54	2.474
	GW in 16_PX	1.96	2.396	2.496		2.472	2.556	2.405
	GW in 15_SZ	2.386	2.405	2.502		2.45	2.561	2.451
	GW in 16_SZ	2.269	2.423	2.523		2.492	2.593	2.353
	Mean	2.2305	2.3715	2.48275		2.45775	2.5625	2.42075
	PGWC in 15_PX	1.19	7.89	0.47		4.13	4.85	1.22
	PGWC in 16_PX	16.23	21.6	12.68		8.93	6.84	11.56
	PGWC in 15_SZ	8.78	10.39	11.55		6.57	4.43	7.76
	PGWC in 16_SZ	30.65	29.45	22.27		17.66	21.26	16.61
	Mean	14.2125	17.3325	11.7425		9.3225	9.345	9.2875
	DEC in 15_PX	0.21	1.65	0.03		0.85	1.1	0.39
	DEC in 16_PX	1.8	6.89	2.67		1.27	1.12	1.98
	DEC in 15_SZ	3.82	2.61	7.5		2.36	2.1	1.8
	DEC in 16_SZ	8.49	10.56	8.76		6.28	6.6	4.22
	Mean	3.58	5.4275	4.74		2.69	2.73	2.0975
	AqGL3b/AqGLWR3a (GS3)	-	-	-		-	-	-
	AqDEC6b/AqPGWC6b (GS6)	T	T	-		-	-	T
	AqGW5a/AqGLWR5/AqDEC5/AqPGWC5 (GW5)	A	A	A		A	A	A
	AqGL7	G	G	-		-	-	-
	AqGL3c/AqGLWR3b	C	C	C		C	C	C
	AqDEC6a/AqPGWC6a	-	-	-		-	-	-
	AqPGWC7	-	-	A		A	A	A
