# Supplementary material for: Genetic background- and environment-independent QTL and candidate gene identification of appearance quality in three MAGIC populations of rice
Source: Front Plant Sci. 2022 Nov 11;13:1074106. doi: 10.3389/fpls.2022.1074106 (PMC9697191; doi:10.3389/fpls.2022.1074106)
Supplement: Supplementary file 4 [file Table_3.xlsx]

## Sheet: by chromosome
	Supplementary Table S3 | QTL identified for five appearance quality-related traits by GWAS.
	Trait	QTL	Chr	QTL region (Mb)	Mixed population	PX				SZ				Cloned gene
						2015		2016		2015		2016
						lead SNP	P	lead SNP	P	lead SNP	P	lead SNP	P
	GL	AqGL3a	3	12.75-13.22	DC2	13017421	2.51598e-06	12953856	0.000104958	-	-	-	-
		AqGL3b	3	16.54-17.24	DC1	16740204	1.67192e-13	17039466	1.00243e-09	16740204	3.86209e-16	16996623	3.63397e-16	GS3(Mao et al., 2010)
					DC2	16734333	1.57432e-06	16734121	5.24329e-05	17013438	2.35119e-08	16881995	2.51848e-08	GS3(Mao et al., 2010)
					8way	16670753	1.16137e-13	16890773	2.82392e-12	16670753	9.87274e-14	16733441	1.38777e-15	GS3(Mao et al., 2010)
					DC1+DC2	16740204	1.20798e-16	16734333	1.89605e-10	16740204	1.12085e-19	16728961	8.82099e-18	GS3(Mao et al., 2010)
					DC1+8way	16731270	4.61961e-16	17039466	2.73289e-15	17013438	1.43483e-16	17013438	2.31777e-18	GS3(Mao et al., 2010)
					DC2+8way	16670753	4.24178e-16	16890773	5.62009e-14	16670753	2.43767e-16	16728414	5.27116e-20	GS3(Mao et al., 2010)
					DC1+DC2+8way	16731270	1.95462e-19	16890773	2.1827e-16	16731270	1.05583e-18	16728414	7.85296e-21	GS3(Mao et al., 2010)
		AqGL3c	3	21.35-21.80	DC1	21547958	1.32923e-08	21598942	3.58972e-06	21547958	1.06511e-09	21598942	1.73317e-07
					8way	21563161	4.35721e-06	21563161	1.40416e-06	21563161	8.77162e-09	21563161	9.83697e-09
					DC1+DC2	21547958	3.10268e-07	21547958	1.49369e-05	21547958	5.05379e-08	21598942	7.83283e-08
					DC1+8way	21563161	1.79052e-07	21563161	2.19738e-08	21563161	1.24776e-10	21563161	1.14449e-09
					DC2+8way	21547958	1.12806e-06	21563161	6.92029e-07	21563161	3.64428e-09	21598942	5.94727e-09
					DC1+DC2+8way	21547958	2.10184e-08	21563161	1.1884e-08	21547958	5.68679e-10	21598942	2.76295e-09
		AqGL7	7	28.08-28.48	DC2	-	-	-	-	28277536	3.65291e-05	-	-
					DC2+8way	-	-	28289861	0.000481576	28277536	0.000109136	28265516	0.000168769
					DC1+DC2+8way	-	-	28289861	0.000186055	28277536	2.37758e-05	28277536	1.75177e-06
	GW	AqGW1	1	5.42-5.89	8way	-	-	-	-	5622335	7.16214e-05	5693687	7.86459e-05
		AqGW2	2	31.70-32.20	DC1+DC2+8way	31899959	7.02644e-05	31995373	2.86977e-05	-	-	-	-	qTGW2 (Ruan et al., 2020)
		AqGW5a	5	5.16-5.56	DC1	5359520	2.09082e-15	5364311	1.19496e-12	5364311	3.77397e-18	5364311	4.38107e-17	GW5 (Weng et al., 2008)
					8way	5359520	4.68355e-10	5359520	8.52e-07	5359520	1.64534e-12	5359520	1.41528e-10	GW5 (Weng et al., 2008)
					DC1+DC2	5359520	4.13969e-21	5368362	6.58099e-16	5359520	2.05707e-29	5368362	3.16116e-24	GW5 (Weng et al., 2008)
					DC1+8way	5359520	5.06542e-23	5359520	4.01664e-17	5359520	2.20519e-27	5359520	2.17033e-23	GW5 (Weng et al., 2008)
					DC2+8way	5359520	2.52569e-13	5359520	2.46338e-09	5359520	1.29259e-19	5359520	3.15457e-16	GW5 (Weng et al., 2008)
					DC1+DC2+8way	5359520	6.30694e-27	5359520	1.4229e-19	5359520	7.66103e-35	5359520	9.79157e-29	GW5 (Weng et al., 2008)
		AqGW5b	5	6.17-6.74	DC2	6384892	4.40591e-06	6372092	2.07191e-05	6384892	2.22153e-06	6372092	9.11037e-08
					8way	6490861	2.22042e-05	-	-	6539977	1.58591e-07	6539977	2.1963e-06
	GLWR	AqGLWR3a	3	16.50-17.20	DC1	16840381	5.5223e-07	16806747	2.49931e-07	16806747	1.53797e-09	16996623	4.76365e-10	GS3(Mao et al., 2010)
					DC2	16734121	5.63576e-08	16734121	2.76368e-08	16881995	8.76648e-09	16728961	4.19898e-07	GS3(Mao et al., 2010)
					8way	16670753	4.82602e-10	16728674	1.79955e-10	16670753	7.18486e-10	16728674	7.1448e-15	GS3(Mao et al., 2010)
					DC1+DC2	16840381	7.45614e-09	16806747	7.338e-11	16806747	1.88281e-13	16874693	4.67101e-12	GS3(Mao et al., 2010)
					DC1+8way	16840381	5.96988e-12	16715212	2.87693e-10	16731270	4.39927e-09	16728414	5.09677e-14	GS3(Mao et al., 2010)
					DC2+8way	16840381	5.24114e-13	16728674	7.76342e-14	16670753	2.0645e-12	16728414	6.83264e-18	GS3(Mao et al., 2010)
					DC1+DC2+8way	16840381	2.12005e-14	16728414	1.19337e-12	16731270	5.01877e-12	16728414	1.4307e-16	GS3(Mao et al., 2010)
		AqGLWR3b	3	21.40-21.80	DC1	-	-	-	-	21598942	9.48271e-06	-	-
					8way	-	-	21563161	8.74986e-05	21563161	1.33884e-05	21563161	1.33253e-06
					DC1+8way	-	-	21563161	0.000125774	21563161	1.38943e-06	21563161	4.57207e-06
					DC2+8way	21547958	0.000167794	21563161	5.69594e-06	21563161	4.22695e-05	21547958	1.20345e-06
					DC1+DC2+8way	21547958	2.4686e-05	21563161	2.01158e-05	21547958	9.7526e-07	21547958	2.82901e-06
		AqGLWR5	5	5.16-5.57	DC1	5363470	6.87859e-09	5364311	1.97714e-12	5364311	1.68414e-11	5364311	8.18929e-10	GW5 (Weng et al., 2008)
					8way	5472784	6.28027e-05	5359520	5.00198e-09	5359520	1.86576e-05	5359520	2.96805e-08	GW5 (Weng et al., 2008)
					DC1+DC2	5368362	3.31987e-09	5368362	3.13787e-15	5359520	1.14123e-15	5368362	7.36932e-13	GW5 (Weng et al., 2008)
					DC1+8way	5472784	1.84398e-11	5359520	7.05507e-20	5359520	1.56895e-14	5359520	2.63432e-17	GW5 (Weng et al., 2008)
					DC2+8way	5368362	3.80362e-05	5359520	1.28573e-13	5368362	5.43839e-09	5359520	1.06574e-12	GW5 (Weng et al., 2008)
					DC1+DC2+8way	5359520	5.42248e-11	5359520	2.05463e-23	5359520	7.80957e-18	5359520	1.11246e-20	GW5 (Weng et al., 2008)
	DEC	AqDEC2	2	31.39-31.80	DC1	-	-	-	-	31604739	1.73809e-05	31592891	0.000222892	qTGW2 (Ruan et al., 2020)
		AqDEC5	5	5.16-5.62	DC1	5359520	2.87465e-10	-	-	5420315	2.30412e-09	5417532	6.02359e-06	GW5 (Weng et al., 2008)
					8way	5363470	1.19852e-05	-	-	-	-	-	-	GW5 (Weng et al., 2008)
					DC1+DC2	5359520	7.43145e-11	5417532	3.12828e-06	5359520	4.52144e-15	5368362	3.27597e-06	GW5 (Weng et al., 2008)
					DC1+8way	5368362	2.70425e-09	-	-	5452485	1.80541e-07	-	-	GW5 (Weng et al., 2008)
					DC2+8way	5363470	3.29918e-07	-	-	5368362	2.63886e-05	-	-	GW5 (Weng et al., 2008)
					DC1+DC2+8way	5368362	2.81168e-11	5417532	1.91728e-05	5368362	3.30856e-11	5368362	3.82081e-05	GW5 (Weng et al., 2008)
		AqDEC6a	6	0.03-0.47	8way	-	-	269275	2.71057e-10	-	-	231935	1.01e-09
					DC1+DC2	-	-	178458	1.65737e-08	-	-	178458	2.09888e-08
					DC2+8way	-	-	231935	1.8094e-11	-	-	178458	3.28695e-10
		AqDEC6b	6	1.50-2.19	DC1	-	-	1962468	1.33431e-17	1703645	5.87585e-06	1993705	5.07205e-08	GS6 (Sun et al., 2013)
					8way	1755963	0.000141266	1962468	4.59007e-14	1768724	7.03663e-06	1962468	1.13e-08	GS6 (Sun et al., 2013)
					DC1+DC2	-	-	1826635	1.41747e-13	1764641	4.58364e-08	1819263	4.74202e-05	GS6 (Sun et al., 2013)
					DC1+8way	1768006	4.05642e-05	1962468	2.63874e-30	1768724	6.08749e-09	1962468	2.94601e-14	GS6 (Sun et al., 2013)
					DC2+8way	1768006	1.87746e-06	1962468	6.54563e-17	1768724	9.39105e-10	1962468	1.58931e-10	GS6 (Sun et al., 2013)
					DC1+DC2+8way	1768006	3.31811e-07	1962468	1.91891e-36	1768724	1.65372e-11	1962468	6.15729e-15	GS6 (Sun et al., 2013)
		AqDEC6c	6	3.12-3.52	DC1	-	-	3322844	4.28454e-07	-	-	-	-
		AqDEC8	8	4.04-4.44	DC2	-	-	4238869	6.56484e-09	-	-	-	-
	PGWC	AqPGWC5	5	5.16-5.62	DC1	5359520	2.44597e-11	-	-	5364311	5.14081e-10	5359520	1.42796e-05	GW5 (Weng et al., 2008)
					8way	5368362	5.34094e-05	-	-	-	-	-	-	GW5 (Weng et al., 2008)
					DC1+DC2	5359520	2.19362e-12	5417532	2.56483e-05	5359520	8.63414e-15	5368362	4.01723e-07	GW5 (Weng et al., 2008)
					DC1+8way	5368362	6.34255e-11	-	-	5364311	8.16379e-12	5368362	0.000104143	GW5 (Weng et al., 2008)
					DC2+8way	5368362	2.05749e-06	-	-	5368362	1.62687e-08	-	-	GW5 (Weng et al., 2008)
					DC1+DC2+8way	5368362	1.21489e-12	5417532	4.40942e-05	5368362	1.71144e-15	5368362	4.92582e-06	GW5 (Weng et al., 2008)
		AqPGWC6a	6	0.00-0.68	8way	-	-	479667	1.17611e-05	-	-	191306	3.18563e-05
					DC2+8way	-	-	231935	3.64364e-05	-	-	191306	1.68542e-05
		AqPGWC6b	6	1.54-2.19	DC1	-	-	1993705	6.2e-08	1765415	8.37725e-08	-	-	GS6 (Sun et al., 2013)
					DC2	1768006	1.39643e-05	-	-	1736459	8.44018e-06	-	-	GS6 (Sun et al., 2013)
					8way	1765761	1.04987e-05	-	-	1768724	1.30499e-06	1736459	1.51812e-07	GS6 (Sun et al., 2013)
					DC1+DC2	1768006	5.99648e-06	1826635	4.51e-07	1764641	4.76086e-10	-	-	GS6 (Sun et al., 2013)
					DC1+8way	1768006	4.92502e-06	1993705	7.74e-10	1764641	8.06745e-09	1768724	3.62644e-09	GS6 (Sun et al., 2013)
					DC2+8way	1768006	2.92548e-08	-	-	1768724	7.45909e-10	1768724	1.18304e-05	GS6 (Sun et al., 2013)
					DC1+DC2+8way	1768006	5.47079e-09	1962468	1.29e-11	1768724	7.90657e-11	1768724	5.25138e-07	GS6 (Sun et al., 2013)
		AqPGWC7	7	25.23-25.63	DC2+8way	25433712	3.21397e-05	-	-	25433712	6.2518e-05	-	-
					DC1+DC2+8way	25433712	4.90469e-05	-	-	25433712	4.86788e-06	25378930	6.45008e-05
		AqPGWC8	8	4.04-4.44	DC2	-	-	4238869	4.61132e-09	-	-	-	-
