# Supplementary material for: Genetic background- and environment-independent QTL and candidate gene identification of appearance quality in three MAGIC populations of rice
Source: Front Plant Sci. 2022 Nov 11;13:1074106. doi: 10.3389/fpls.2022.1074106 (PMC9697191; doi:10.3389/fpls.2022.1074106)
Supplement: Supplementary file 5 [file Table_4.xlsx]

## Sheet: 统一命名
	Supplementary Table S4 | QTL identified for five appearance quality-related traits by linkage analysis.
	Trait	QTL	Chr.	Interval (Mb)	Population	Env.	LOD	PVE (%)	Add1	Add2	Add3	Add4	Add5	Add6	Add7	Add8	Cloned gene
	GL	GqGL1a	1	10.52-10.56	DC1	15_PX	6.4561	4.0723	-0.1464	0.2294	0.0683	-0.1513	-	-	-	-
					DC1	15_SZ	10.7	4.7936	-0.1574	0.1581	0.111	-0.1116	-	-	-	-
					DC1	16_SZ	9.0954	4.0035	-0.1159	0.1312	0.0993	-0.1146	-	-	-	-
		GqGL3a	3	14.22-17.94	DC1	15_PX	33.9846	24.0745	-0.3187	0.2721	-0.2478	0.2944	-	-	-	-	GS3(Mao et al., 2010)
					DC1	16_PX	10.6946	10.326	-0.1998	0.1895	-0.1618	0.172	-	-	-	-	GS3(Mao et al., 2010)
					DC1	15_SZ	42.609	23.7774	-0.3062	0.2821	-0.2543	0.2784	-	-	-	-	GS3(Mao et al., 2010)
					DC1	16_SZ	38.653	20.4641	-0.2808	0.2875	-0.2179	0.2112	-	-	-	-	GS3(Mao et al., 2010)
		GqGL4	4	28.53-28.56	DC1	15_SZ	5.7946	2.4819	-0.0987	-0.0635	0.0441	0.1181	-	-	-	-
					DC1	16_SZ	7.6356	3.2695	-0.1679	-0.0083	0.1032	0.0729	-	-	-	-
		GqGL5	5	27.09-27.37	DC1	15_SZ	12.085	5.5912	0.1924	0.0552	-0.1238	-0.1237	-	-	-	-
					DC1	16_SZ	9.3327	4.2145	0.1066	-0.0127	0.0394	-0.1333	-	-	-	-
	GW	GqGW4	4	28.78-28.92	DC1	16_PX	11.5864	8.8059	-0.1183	-0.0943	0.193	0.0196	-	-	-	-
					DC1	16_SZ	7.5496	2.6931	-0.051	-0.0475	0.0811	0.0174	-	-	-	-
	GW	GqGW5a	5	5.31-5.39	DC1	15_PX	33.4486	25.0754	0.1579	-0.0429	-0.0439	-0.0711	-	-	-	-	GW5 (Weng et al., 2008)
					DC1	15_SZ	59.338	38.0035	0.187	-0.0516	-0.0729	-0.0625	-	-	-	-	GW5 (Weng et al., 2008)
					DC1	16_SZ	71.2009	39.1336	0.1876	-0.0603	-0.0596	-0.0678	-	-	-	-	GW5 (Weng et al., 2008)
	GLWR	GqGLWR11	11	22.45-27.40	DC1	15_PX	17.1914	8.0853	-0.1195	0.1965	0.0774	-0.1544	-	-	-	-
					DC1	16_SZ	8.7601	3.2191	-0.0748	0.1276	0.0371	-0.0899	-	-	-	-
		GqGLWR3a	3	6.68-6.90	DC1	16_PX	11.5526	3.6324	-0.0578	0.0379	-0.0457	0.0656	-	-	-	-
					DC1	16_SZ	5.6744	1.9606	-0.0502	0.0065	-0.0195	0.0632	-	-	-	-
		GqGLWR3b	3	14.22-17.94	DC1	15_PX	11.0593	5.0224	-0.1102	0.0868	-0.0444	0.0678	-	-	-	-	GS3(Mao et al., 2010)
					DC1	16_PX	28.769	10.048	-0.1196	0.0878	-0.0604	0.0922	-	-	-	-	GS3(Mao et al., 2010)
					DC1	15_SZ	22.544	10.3889	-0.1145	0.1239	-0.0887	0.0793	-	-	-	-	GS3(Mao et al., 2010)
					DC1	16_SZ	27.0155	10.8151	-0.1156	0.1463	-0.1112	0.0806	-	-	-	-	GS3(Mao et al., 2010)
		GqGLWR5	5	5.31-6.42	DC1	15_PX	32.3347	16.6923	-0.2376	0.0732	0.0977	0.0668	-	-	-	-	GW5 (Weng et al., 2008)
					DC1	16_PX	59.179	25.9067	-0.2459	0.0918	0.0625	0.0916	-	-	-	-	GW5 (Weng et al., 2008)
					DC1	15_SZ	42.708	22.592	-0.2427	0.0981	0.1005	0.0441	-	-	-	-	GW5 (Weng et al., 2008)
					DC1	16_SZ	42.4055	21.2945	-0.2073	0.0633	0.014	0.13	-	-	-	-	GW5 (Weng et al., 2008)
		GqGLWR9	9	15.92-17.66	DC1	16_PX	9.13	3.0002	0.0531	-0.0531	0.0616	-0.0617	-	-	-	-
					DC1	15_SZ	7.9161	3.6785	0.0743	-0.1175	0.085	-0.0418	-	-	-	-
					DC1	16_SZ	14.3789	5.4176	0.0979	-0.1255	0.0968	-0.0692	-	-	-	-
	DEC	GqDEC5a	5	5.31-5.39	DC1	15_PX	7.5391	1.9202	1.6523	0.3022	-0.8149	-1.1396	-	-	-	-	GW5 (Weng et al., 2008)
					DC1	16_PX	7.1155	4.0932	6.2578	-4.8941	2.9855	-4.3492	-	-	-	-	GW5 (Weng et al., 2008)
					DC1	15_SZ	23.3943	14.0886	9.6056	0.5746	-9.2781	-0.9021	-	-	-	-	GW5 (Weng et al., 2008)
		GqDEC6	6	0.59-1.68	DC1	16_PX	36.9784	26.0344	-6.2805	-16.6075	-13.3998	36.2878	-	-	-	-	GS6 (Sun et al., 2013)
					DC1	16_SZ	10.1329	5.8747	1.0745	-2.825	-4.4858	6.2363	-	-	-	-	GS6 (Sun et al., 2013)
	PGWC	GqPGWC5a	5	5.31-5.39	DC1	15_PX	9.8124	7.0871	6.7559	1.0738	-3.0134	-4.8163	-	-	-	-	GW5 (Weng et al., 2008)
					DC1	16_PX	8.9689	6.5158	9.8719	-8.6295	5.9847	-7.227	-	-	-	-	GW5 (Weng et al., 2008)
					DC1	15_SZ	25.9133	22.0093	24.3523	0.8304	-18.0596	-7.1231	-	-	-	-	GW5 (Weng et al., 2008)
		GqPGWC6	6	0.59-1.69	DC1	16_PX	12.5801	9.6382	1.5239	-12.1197	-11.857	22.4528	-	-	-	-	GS6 (Sun et al., 2013)
					DC1	15_SZ	6.3434	4.6348	-1.5695	10.3547	6.8365	-15.6216	-	-	-	-	GS6 (Sun et al., 2013)
		GqPGWC8a	8	17.86-18.18	DC1	15_PX	6.8025	4.8475	2.0491	5.0775	-4.4146	-2.7121	-	-	-	-
					DC1	16_SZ	9.2681	6.4039	5.7785	3.8381	-4.9688	-4.6478	-	-	-	-
	GL	GqGL3a	3	15.52-16.96	DC2	15_PX	19.4895	7.1013	0.2466	-0.401	-0.091	0.2453	-	-	-	-	GS3(Mao et al., 2010)
					DC2	16_PX	9.1588	7.9655	0.3263	-0.2835	-0.4228	0.38	-	-	-	-	GS3(Mao et al., 2010)
					DC2	15_SZ	22.7468	13.2121	0.3615	-0.405	-0.2995	0.343	-	-	-	-	GS3(Mao et al., 2010)
					DC2	16_SZ	14.0805	11.7251	0.2241	-0.4093	-0.0989	0.2841	-	-	-	-	GS3(Mao et al., 2010)
		GqGL7	7	28.45-28.56	DC2	15_PX	9.998	3.5182	0.1387	0.0459	-0.0946	-0.09	-	-	-	-
					DC2	15_SZ	14.8105	7.7966	0.2176	-0.127	-0.0433	-0.0473	-	-	-	-
		GqGL9	9	17.67-20.09	DC2	15_PX	9.6096	3.4281	-0.0691	0.0961	0.1166	-0.1436	-	-	-	-
					DC2	15_SZ	13.2277	7.0346	-0.1213	0.1317	0.122	-0.1324	-	-	-	-
	GW	GqGW1	1	1.40-1.45	DC2	15_SZ	11.7222	4.2681	-0.0349	-0.035	0.0195	0.0504	-	-	-	-
					DC2	16_SZ	7.4303	6.0277	-0.0391	-0.031	0.0092	0.0609	-	-	-	-
		GqGW2a	2	26.37-26.5	DC2	15_PX	11.8036	6.2962	0.0437	-0.0428	0.039	-0.0399	-	-	-	-
					DC2	16_PX	9.8186	7.7193	0.0507	-0.0524	0.0457	-0.0439	-	-	-	-
					DC2	16_SZ	9.8619	8.4256	0.0289	-0.0152	0.0336	-0.0473	-	-	-	-
		GqGW2b	2	29.82-31.85	DC2	15_PX	5.4912	2.7637	-0.0208	0.0302	0.0259	-0.0353	-	-	-	-
					DC2	16_PX	8.0157	5.923	-0.0502	0.0398	0.0589	-0.0486	-	-	-	-
					DC2	15_SZ	17.3023	6.5301	0.0324	-0.0259	0.0337	-0.0402	-	-	-	-
					DC2	16_SZ	8.0122	6.5185	-0.0352	0.0267	0.0492	-0.0407	-	-	-	-
		GqGW8	8	5.33-5.60	DC2	16_PX	9.8024	7.5554	-0.0085	0.1343	-0.1369	0.0111	-	-	-	-
					DC2	15_SZ	8.5466	3.5868	-0.0178	0.0642	-0.0202	-0.0261	-	-	-	-
					DC2	16_SZ	10.2213	8.631	-0.0198	0.0873	-0.0519	-0.0156	-	-	-	-
	GLWR	GqGLWR12	12	17.41-18.05	DC2	16_PX	10.3762	5.1562	0.0907	-0.0364	0.1075	-0.1618	-	-	-	-
					DC2	16_SZ	7.0975	2.6432	0.074	-0.0187	0.0777	-0.133	-	-	-	-
		GqGLWR3b	3	16.59-16.72	DC2	15_PX	10.6433	2.548	0.1138	-0.2486	0.0383	0.0965	-	-	-	-	GS3(Mao et al., 2010)
					DC2	16_PX	11.6536	6.2395	0.088	-0.1738	-0.0523	0.1382	-	-	-	-	GS3(Mao et al., 2010)
					DC2	15_SZ	16.023	10.8475	0.0994	-0.2663	0.0603	0.1066	-	-	-	-	GS3(Mao et al., 2010)
					DC2	16_SZ	10.4932	4.3616	0.1149	-0.1406	-0.0846	0.1103	-	-	-	-	GS3(Mao et al., 2010)
		GqGLWR4	4	29.08-29.25	DC2	16_PX	6.5566	3.1845	0.1202	-0.1506	-0.1133	0.1437	-	-	-	-
					DC2	15_SZ	14.1556	9.7949	0.1575	-0.2884	-0.0677	0.1986	-	-	-	-
					DC2	16_SZ	6.3613	2.3729	0.1115	-0.1311	-0.1067	0.1264	-	-	-	-
		GqGLWR8.2	8	5.33-5.60	DC2	16_PX	25.8613	15.3055	0.0054	-0.3172	0.2996	0.0122	-	-	-	-
					DC2	15_SZ	18.9071	13.9967	-0.017	-0.2784	0.3029	-0.0075	-	-	-	-
					DC2	16_SZ	14.2747	5.7939	-0.0145	-0.2088	0.232	-0.0087	-	-	-	-
	DEC	GqDEC1	1	5.65-18.54	DC2	15_PX	8.3879	0.5681	-2.8305	10.1261	-3.2494	-4.0462	-	-	-	-
					DC2	15_SZ	8.5664	2.2398	-6.2116	9.0443	-7.5554	4.7227	-	-	-	-
		GqDEC12	12	15.19-15.33	DC2	15_PX	13.5705	0.6417	-10.3967	-10.0845	30.7822	-10.3011	-	-	-	-
					DC2	16_PX	5.5217	3.4644	-5.5578	-4.9423	22.0831	-11.583	-	-	-	-
					DC2	16_SZ	5.2501	7.7437	-1.3048	-1.8671	-5.1234	8.2953	-	-	-	-
		GqDEC3	3	4.27-32.49	DC2	15_PX	23.5514	0.9224	-6.7835	-8.7704	24.0558	-8.5018	-	-	-	-
					DC2	15_SZ	8.5836	3.6123	-8.899	-10.3546	25.4021	-6.1486	-	-	-	-
		GqDEC4	4	4.52-5.10	DC2	15_PX	13.9014	0.8524	-9.2477	24.4841	-9.2872	-5.9492	-	-	-	-
					DC2	15_SZ	8.2324	2.3065	-12.1311	3.4282	-10.82	19.523	-	-	-	-
	PGWC	GqPGWC11	11	2.45-3.04	DC2	15_PX	5.5699	2.1159	-8.2349	-8.6917	-4.562	21.4886	-	-	-	-
					DC2	16_PX	9.2993	3.814	-5.2139	5.2877	6.3864	-6.4602	-	-	-	-
		GqPGWC1a	1	8.76-13.46	DC2	16_PX	7.4509	2.8716	-4.9305	7.1802	-5.8532	3.6035	-	-	-	-
					DC2	16_SZ	5.387	4.0341	-4.3283	3.4036	-5.7893	6.714	-	-	-	-
					DC2	15_PX	5.4791	1.6065	-10.8563	-15.1494	39.4345	-13.4289	-	-	-	-
					DC2	15_SZ	11.6774	8.4102	-16.4986	14.1484	-16.8533	19.2035	-	-	-	-
		GqPGWC1b	1	29.13-30.02	DC2	15_PX	5.3203	0.8103	-6.5087	-4.9067	5.7906	5.6248	-	-	-	-
					DC2	16_SZ	6.0671	5.1664	-7.2293	-2.854	5.3059	4.7775	-	-	-	-
		GqPGWC8b	8	26.39-27.80	DC2	15_PX	7.6674	2.6371	-13.0113	-11.3458	36.6201	-12.263	-	-	-	-
					DC2	15_SZ	5.5113	3.7976	13.0873	-3.9507	-19.7525	10.6159	-	-	-	-
	GL	GqGL1b	1	9.13-40.35	8way	15_SZ	11.6771	6.4373	-0.0782	-0.1142	-0.0503	-0.167	0.214	-0.0035	-0.0105	0.2098
					8way	16_SZ	10.3654	3.1626	-0.1508	0.0391	-0.0585	-0.1465	0.1234	0.1046	-0.0485	0.1372
		GqGL3a	3	16.21-16.66	8way	15_PX	20.5344	5.9217	-0.1762	0.187	-0.3312	0.1412	0.3271	-0.1697	-0.0968	0.1185	GS3(Mao et al., 2010)
					8way	16_PX	13.5788	5.794	-0.0168	0.2158	-0.2734	0.1805	0.5167	-0.0693	-0.6524	0.0988	GS3(Mao et al., 2010)
					8way	15_SZ	11.7087	6.3521	-0.0528	0.1048	-0.2854	0.0627	0.315	-0.0243	-0.2428	0.1228	GS3(Mao et al., 2010)
					8way	16_SZ	16.7641	5.9124	-0.05	0.1487	-0.2684	0.2236	0.3068	-0.1508	-0.3694	0.1595	GS3(Mao et al., 2010)
		GqGL3b	3	20.06-22.24	8way	15_PX	22.9288	6.645	-0.5601	0.0482	-0.1595	0.0896	0.2389	0.04	0.2566	0.0463
					8way	16_PX	16.9729	7.4085	-0.4202	0.0863	-0.2701	0.0222	0.4109	0.0482	0.1964	-0.0737
					8way	16_SZ	19.6983	6.7348	-0.4329	0.1022	-0.1682	0.0204	0.1981	-0.0072	0.2504	0.0373
	GW	GqGW5a	5	5.36-19.28	8way	16_PX	15.0146	10.9395	0.0831	0.0223	-0.0544	0.0673	-0.058	0.0226	-0.0833	0.0005	GW5 (Weng et al., 2008)
					8way	15_SZ	10.8079	6.3206	0.0589	-0.017	-0.014	0.0096	-0.0494	-0.0057	0.0587	-0.0411	GW5 (Weng et al., 2008)
					8way	16_SZ	8.0758	3.8268	0.0658	-0.0343	-0.0294	0.0123	-0.0128	0.0229	-0.0117	-0.0129	GW5 (Weng et al., 2008)
		GqGW5b	5	6.54-6.55	8way	15_SZ	10.4511	5.9597	0.0747	-0.0226	-0.0063	0.0372	-0.0125	-0.052	-0.0331	0.0145
					8way	16_SZ	10.6787	5.0742	0.1012	-0.0124	0.0059	0.0099	-0.0082	-0.0643	-0.0364	0.0044
	GLWR	GqGLWR1	1	9.15-40.61	8way	15_PX	10.0827	3.5828	-0.035	-0.0002	0.1019	0.016	0.0843	-0.1172	-0.0019	-0.0479
					8way	16_PX	9.3374	4.5333	-0.0678	0.065	0.06	-0.011	0.0659	-0.0344	0.0165	-0.0942
					8way	15_SZ	12.0761	6.0805	-0.0824	-0.0066	0.1124	0.0232	0.0682	-0.0154	-0.0594	-0.04
		GqGLWR3b	3	4.27-16.73	8way	15_PX	14.7414	5.1633	-0.0558	0.0429	-0.1175	0.0083	0.1422	-0.1132	0.0797	0.0133	GS3(Mao et al., 2010)
					8way	15_SZ	9.2074	4.46	-0.0445	0.0212	-0.0903	0.0283	0.1204	-0.1346	0.1165	-0.0171	GS3(Mao et al., 2011)
					8way	16_SZ	16.775	3.6677	-0.088	0.078	-0.097	0.0675	-0.0142	-0.0365	0.0188	0.0713	GS3(Mao et al., 2012)
		GqGLWR3c	3	21.56-22.10	8way	15_PX	10.8292	3.8188	-0.0442	0.0472	-0.076	0.0595	-0.0354	0.0793	-0.1139	0.0835
					8way	15_SZ	10.1657	5.0796	-0.0739	0.0631	-0.0979	0.0747	-0.0132	0.0702	-0.1016	0.0785
		GqGLWR4	4	29.64-29.72	8way	16_PX	8.8592	4.3919	-0.1137	0.0381	-0.0017	-0.0389	0.0362	0.0206	-0.0336	0.093
					8way	15_SZ	7.7881	4.6557	-0.1275	0.0941	0.0693	-0.0474	0.0128	0.0043	-0.0312	0.0257
		GqGLWR5	5	5.43-16.36	8way	16_PX	11.2161	5.5347	-0.1304	-0.0459	-0.0646	0.0053	0.0523	0.0875	0.0675	0.0284	GW5 (Weng et al., 2008)
					8way	15_SZ	7.9645	3.8538	-0.1058	-0.0578	-0.0252	-0.0196	0.0719	0.0595	0.0381	0.0389	GW5 (Weng et al., 2008)
	DEC	GqDEC5b	5	8.97-9.22	8way	15_PX	11.0649	3.3696	4.6432	0.0427	2.3796	-1.3199	0.174	-3.4114	-0.9796	-1.5286
					8way	16_PX	8.8921	6.2401	5.4059	-2.434	-0.8207	0.3567	3.5794	-1.035	-4.4668	-0.5855
		GqDEC5c	5	6.54-7.84	8way	15_PX	11.3088	3.4693	4.8103	-0.7638	3.1464	-2.1179	-0.6206	-3.9041	-0.4155	-0.1348
					8way	16_SZ	8.0369	4.3262	3.376	-5.5315	-2.6084	3.1221	3.2417	-1.5862	-1.4726	1.4591
		GqDEC6	6	1.83-2.37	8way	15_SZ	8.2392	5.7209	0.2652	6.0224	4.5419	6.8558	-4.2848	-3.8526	-2.9875	-6.5606	GS6 (Sun et al., 2013)
	PGWC	GqPGWC5b	5	6.54-7.84	8way	15_PX	14.8691	5.2741	14.4195	-3.2573	10.2711	-7.9357	-5.2892	-9.9509	4.1506	-2.4081
					8way	16_SZ	9.2688	4.1685	6.5594	-9.2401	-2.9499	4.671	4.9027	-4.8814	-3.0806	4.0189
		GqPGWC5c	5	8.97-9.22	8way	15_PX	12.8529	4.5437	14.2351	0.3319	3.5651	-3.4671	-2.41	-10.2747	2.1485	-4.1288
					8way	16_PX	9.3951	10.0887	11.7376	-5.1346	-0.0996	0.3112	5.3626	-1.3953	-8.4864	-2.2954
		GqPGWC5d	5	14.20-14.83	8way	15_PX	7.6926	2.8972	12.4808	-2.1002	2.6003	-1.6026	-4.8369	-4.4201	-1.3196	-0.8018
					8way	16_SZ	7.6744	3.8934	7.2562	-2.1114	-4.9052	5.7547	0.8643	-6.0928	-4.708	3.9422
		GqPGWC6	6	1.83-2.34	8way	15_SZ	8.3859	5.3265	-3.0361	16.8397	11.4632	0.9638	-11.5127	4.1982	0.5922	-19.5083	GS6 (Sun et al., 2013)
					8way	16_SZ	8.7648	4.2561	-10.3077	12.9785	2.6049	-3.5691	-7.0829	-0.3506	1.1649	4.5619	GS6 (Sun et al., 2013)
